# Supplementary material
Source: publisher site journal article supplement (https://www.dovepress.com/article/466136)
Supplement: Supplementary file 1 [file get_supplementary_file.php]

## Supplementary Figures

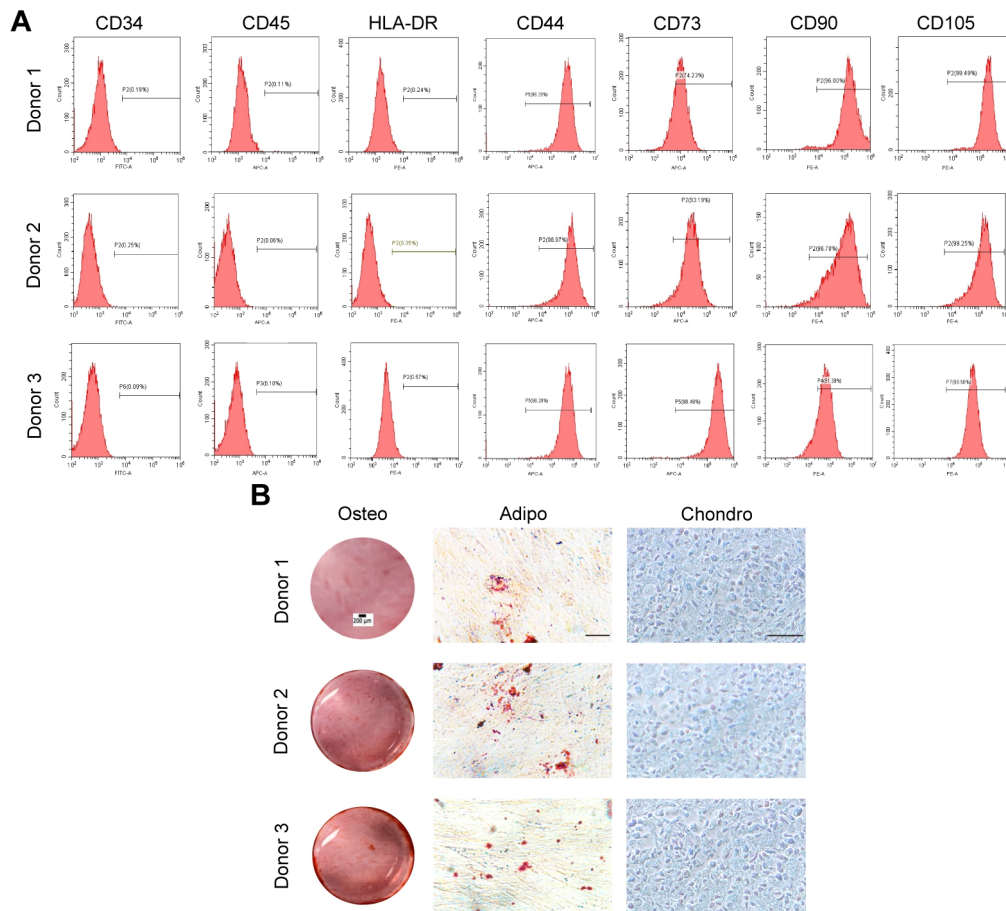

**Figure S1** Characterization of SNTSCs. **(A)** Flow cytometric analyses of SNTSCs. **(B)**

Representative images of Alizarin Red S, Oil Red O staining and Alcian blue staining of the chondrogenic pellets. (Scale = 200  $\mu$ m, 50  $\mu$ m, 50  $\mu$ m.)

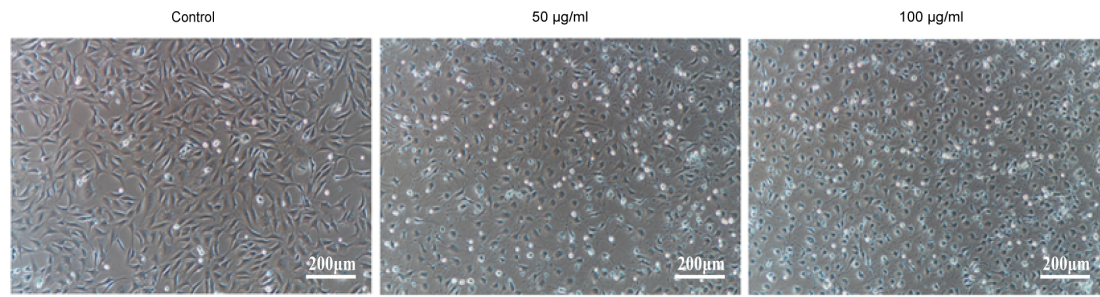

**Figure S2** Images of HUVECs under high dose of SNTSC-ApoEVs for 3 days. After 3 days of SNTSC-ApoEVs treatment, the morphology of HUVECs altered in the 50 µg/ml and 100 µg/ml groups. (Scale = 200 µm.)

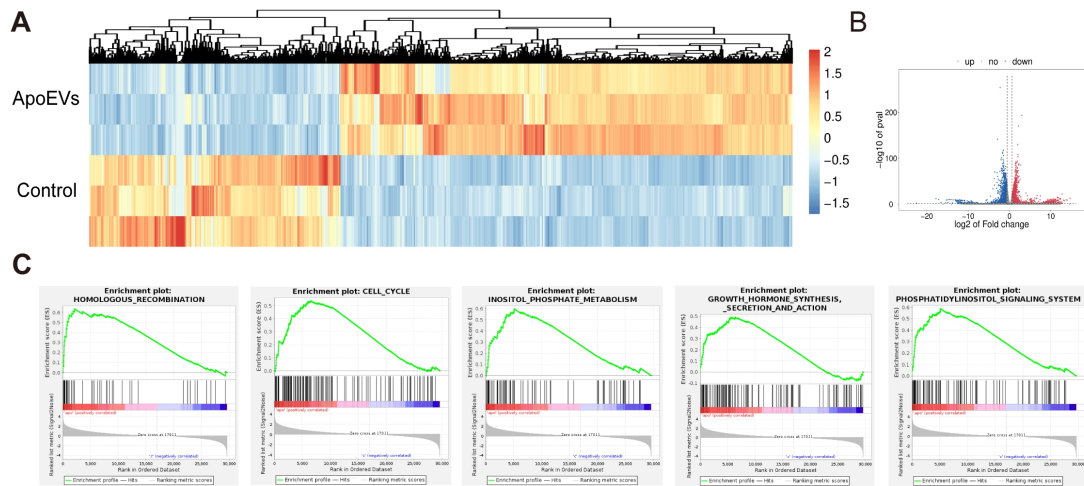

**Figure S3** SNTSC-ApoEVs modulated gene expression of HUVECs. **(A)** Heatmap of the 5863 differentially expressed genes between the control and SNTSC-ApoEVs-treated groups. **(B)** Volcano plot showing upregulated (red dots) and downregulated (blue dots) genes. **(C)** GSEA-KEGG pathway analysis of significantly upregulated genes in HUVECs treated with SNTSC-ApoEVs.

**Table S1. List of all the proteins identified during proteomic analysis.**

| <b>Protein</b>        | <b>SNTSC-ApoEVs-1-Free Quant</b> | <b>SNTSC-ApoEVs-2-Free Quant</b> | <b>SNTSC-ApoEVs-3-Free Quant</b> |
|-----------------------|----------------------------------|----------------------------------|----------------------------------|
| sp P04217 A1BG_HUMAN  | 2609.4734                        | 951.8012                         | 5905.8574                        |
| sp P01023 A2MG_HUMAN  | 87603.72                         | 41753.164                        | 8388.063                         |
| sp Q13685 AAMP_HUMAN  | 350.2976                         | NaN                              | 8823.477                         |
| sp P49588 SYAC_HUMAN  | 5024.3545                        | NaN                              | 41180.617                        |
| sp Q9BTE6 AASD1_HUMAN | 165.9613                         | NaN                              | 1842.9047                        |
| sp Q8WWZ4 ABCAA_HUMAN | 12847.383                        | 2773.0107                        | 11965.486                        |
| sp Q9BZC7 ABCA2_HUMAN | NaN                              | 445.12476                        | 10952.443                        |
| sp P08183 MDR1_HUMAN  | 3084.8516                        | NaN                              | 3738.9941                        |
| sp O95342 ABCBB_HUMAN | 1445.5498                        | NaN                              | 10996.757                        |
| sp P33527 MRP1_HUMAN  | 8668.512                         | NaN                              | 3240.685                         |
| sp O15438 MRP3_HUMAN  | 2344.4956                        | NaN                              | 1948.8894                        |
| sp O15439 MRP4_HUMAN  | 7263.263                         | NaN                              | 3287.0205                        |
| sp P33897 ABCD1_HUMAN | 640.4852                         | NaN                              | 4731.1895                        |
| sp P28288 ABCD3_HUMAN | 7002.9683                        | NaN                              | 344.92822                        |
| sp P61221 ABCE1_HUMAN | 4092.622                         | NaN                              | 2075.5242                        |
| sp Q8NE71 ABCF1_HUMAN | 4763.7324                        | NaN                              | 677.8869                         |
| sp Q9UG63 ABCF2_HUMAN | 6069.9937                        | NaN                              | 2864.3306                        |
| sp Q9NUQ8 ABCF3_HUMAN | 1695.6232                        | NaN                              | 6504.0635                        |
| sp Q9NUJ1 ABHDA_HUMAN | 2080.8555                        | NaN                              | 6382.0503                        |
| sp Q8N2K0 ABD12_HUMAN | 1563.6064                        | NaN                              | 824.0261                         |
| sp Q96IU4 ABHEB_HUMAN | 615.2934                         | NaN                              | 295.3051                         |
| sp O95870 ABHGA_HUMAN | 900.433                          | NaN                              | 1511.7329                        |
| sp Q8IZP0 ABI1_HUMAN  | 1855.5247                        | NaN                              | 4221.518                         |
| sp Q9P1F3 ABRAL_HUMAN | 760.6892                         | NaN                              | 4578.725                         |
| sp Q15018 ABRX2_HUMAN | 244.82051                        | NaN                              | 5163.6157                        |
| sp P09110 THIK_HUMAN  | 5710.8022                        | NaN                              | 6337.867                         |
| sp P42765 THIM_HUMAN  | 8086.7676                        | 354.12115                        | 11228.293                        |
| sp Q13085 ACACA_HUMAN | 1562.7046                        | NaN                              | 20009.11                         |
| sp Q9H845 ACAD9_HUMAN | 2556.0828                        | NaN                              | 10100.912                        |
| sp P11310 ACADM_HUMAN | 379.35306                        | NaN                              | 5243.597                         |
| sp P49748 ACADV_HUMAN | 10166.151                        | 494.12253                        | 10031.679                        |

|                       |           |           |           |
|-----------------------|-----------|-----------|-----------|
| sp P16112 PGCA_HUMAN  | 298.93323 | NaN       | 467.99506 |
| sp Q15057 ACAP2_HUMAN | 1962.4823 | NaN       | 10376.246 |
| sp P24752 THIL_HUMAN  | 7174.4434 | 280.76428 | 21021.201 |
| sp Q9BWD1 THIC_HUMAN  | 7342.113  | NaN       | 8914.313  |
| sp Q9H3P7 GCP60_HUMAN | 757.364   | NaN       | 4328.8276 |
| sp P53396 ACLY_HUMAN  | 12863.405 | 484.6665  | 17484.727 |
| sp P21399 ACOHC_HUMAN | 8505.414  | NaN       | 11384.359 |
| sp Q99798 ACON_HUMAN  | 6196.643  | 204.41548 | 5689.748  |
| sp O00154 BACH_HUMAN  | 9785.595  | NaN       | 1700.7755 |
| sp Q9Y305 ACOT9_HUMAN | 5528.902  | NaN       | 29321.455 |
| sp Q15067 ACOX1_HUMAN | 723.1584  | NaN       | 4233.865  |
| sp O15254 ACOX3_HUMAN | 556.8563  | NaN       | 8299.368  |
| sp P24666 PPAC_HUMAN  | 1973.9869 | NaN       | 23070.836 |
| sp P11117 PPAL_HUMAN  | 4246.2656 | NaN       | 2488.7173 |
| sp P33121 ACSL1_HUMAN | 4239.8154 | NaN       | 605.40247 |
| sp O95573 ACSL3_HUMAN | 13753.62  | 993.3939  | 10698.082 |
| sp O60488 ACSL4_HUMAN | 13471.306 | 788.00464 | 2971.5906 |
| sp Q9NR19 ACSA_HUMAN  | 455.29404 | NaN       | 15701.227 |
| sp P60709 ACTB_HUMAN  | 593.9885  | 6297.0776 | 9398.611  |
| sp Q562R1 ACTBL_HUMAN | 505.35315 | NaN       | 18381.188 |
| sp P68032 ACTC_HUMAN  | 42646.48  | 96.508896 | 2199.181  |
| sp P63261 ACTG_HUMAN  | 297187.12 | 52739.61  | 2888.693  |
| sp O96019 ACL6A_HUMAN | 341.02496 | NaN       | 3139.8064 |
| sp P12814 ACTN1_HUMAN | 54439.83  | 9989.031  | 5687.754  |
| sp O43707 ACTN4_HUMAN | 22837.635 | 2519.5732 | 17207.945 |
| sp Q9NZ32 ARP10_HUMAN | 2168.3481 | NaN       | 3592.6365 |
| sp P61163 ACTZ_HUMAN  | 10633.571 | NaN       | 9876.525  |
| sp P42025 ACTY_HUMAN  | 900.6736  | NaN       | 444.50073 |
| sp P61160 ARP2_HUMAN  | 17080.06  | 0         | 5125.4062 |
| sp P61158 ARP3_HUMAN  | 15082.909 | 815.31537 | 17217.836 |
| sp Q04771 ACVR1_HUMAN | 8556.978  | NaN       | 338.60892 |
| sp P00813 ADA_HUMAN   | 87.73685  | 1376.8369 | 60541.066 |
| sp O14672 ADA10_HUMAN | 6100.67   | NaN       | 32985.23  |

|                       |           |           |           |
|-----------------------|-----------|-----------|-----------|
| sp Q13443 ADAM9_HUMAN | 6193.034  | NaN       | 9558.032  |
| sp P55265 DSRAD_HUMAN | 419.33014 | NaN       | 18393.203 |
| sp O60503 ADCY9_HUMAN | 759.21173 | NaN       | 12830.398 |
| sp P35611 ADDA_HUMAN  | 3779.2373 | NaN       | 21922.047 |
| sp Q9UEY8 ADDG_HUMAN  | 4820.007  | NaN       | 4062.6345 |
| sp Q96PE1 AGRA2_HUMAN | 268.12    | NaN       | 3083.5576 |
| sp P48960 AGRE5_HUMAN | 5387.319  | NaN       | 179.22346 |
| sp P11766 ADHX_HUMAN  | 9756.6    | NaN       | 19151.129 |
| sp Q9BV57 MTND_HUMAN  | 986.0338  | NaN       | 8529.311  |
| sp P55263 ADK_HUMAN   | 3456.6372 | NaN       | 2437.754  |
| sp Q9BRR6 ADPGK_HUMAN | 4745.136  | NaN       | 8667.611  |
| sp Q16186 ADRM1_HUMAN | 1035.7169 | NaN       | 9194.835  |
| sp P30566 PUR8_HUMAN  | 2653.961  | NaN       | 21942.44  |
| sp P30520 PURA2_HUMAN | 4918.8535 | NaN       | 4233.8696 |
| sp Q9Y4W6 AFG32_HUMAN | 265.0688  | NaN       | 12058.481 |
| sp P43652 AFAM_HUMAN  | 1299.6733 | NaN       | 71073.42  |
| sp P02771 FETA_HUMAN  | 24486.97  | 18888.578 | 998.1627  |
| sp P20933 ASPG_HUMAN  | 489.07352 | NaN       | 12494.095 |
| sp Q53H12 AGK_HUMAN   | 1922.0356 | NaN       | 18692.846 |
| sp Q99943 PLCA_HUMAN  | 2449.8364 | NaN       | 2772.4426 |
| sp O00116 ADAS_HUMAN  | 4386.608  | NaN       | 633.579   |
| sp P01019 ANGT_HUMAN  | 1367.367  | 453.57883 | 6534.1826 |
| sp Q6RW13 ATRAP_HUMAN | 4373.4697 | NaN       | 767.15894 |
| sp P23526 SAHH_HUMAN  | 6492.8057 | 903.97107 | 8734.977  |
| sp O43865 SAHH2_HUMAN | 5816.5127 | NaN       | 19260.74  |
| sp Q09666 AHNK_HUMAN  | 24137.02  | 5096.805  | 6696.4204 |
| sp O95433 AHSA1_HUMAN | 15110.779 | NaN       | 8168.584  |
| sp P02765 FETUA_HUMAN | 33780.902 | 18617.684 | 10678.939 |
| sp O95831 AIFM1_HUMAN | 1162.6565 | NaN       | 14376.5   |
| sp Q9BRQ8 FSP1_HUMAN  | 3599.1235 | NaN       | 23911.855 |
| sp Q9NVV5 AIG1_HUMAN  | 543.0348  | NaN       | 20411.502 |
| sp Q12904 AIMP1_HUMAN | 1605.7546 | NaN       | 24456.398 |
| sp Q13155 AIMP2_HUMAN | 5648.804  | NaN       | 3261.844  |

|                       |           |            |           |
|-----------------------|-----------|------------|-----------|
| sp O00170 AIP_HUMAN   | 880.289   | NaN        | 13958.043 |
| sp P00568 KAD1_HUMAN  | 6975.6865 | 351.69476  | 2618.2812 |
| sp P54819 KAD2_HUMAN  | 1368.9336 | NaN        | 4758.1255 |
| sp Q9UIJ7 KAD3_HUMAN  | 5819.355  | 159.26997  | 5514.817  |
| sp Q9Y6K8 KAD5_HUMAN  | 756.0431  | NaN        | 923.39935 |
| sp Q9UKA4 AKA11_HUMAN | 1053.3514 | NaN        | 1441.7335 |
| sp Q02952 AKA12_HUMAN | 2881.1365 | NaN        | 18502.9   |
| sp Q9Y2D5 AKAP2_HUMAN | 2502.2468 | NaN        | 3545.931  |
| sp P14550 AK1A1_HUMAN | 6266.3916 | 117.517395 | 6525.5337 |
| sp P15121 ALDR_HUMAN  | 8637.022  | 2771.6091  | 1426.9509 |
| sp Q04828 AK1C1_HUMAN | 6172.7075 | NaN        | 305.92224 |
| sp O43488 ARK72_HUMAN | 3933.4023 | NaN        | 3568.894  |
| sp P31749 AKT1_HUMAN  | 3414.4875 | NaN        | 28279.215 |
| sp P31751 AKT2_HUMAN  | 936.25354 | NaN        | 2847.183  |
| sp P02768 ALBU_HUMAN  | 84179.43  | 142621.2   | 14709.26  |
| sp Q13740 CD166_HUMAN | 11823.182 | 489.70105  | 4383.873  |
| sp Q8IZ83 A16A1_HUMAN | 9941.439  | NaN        | 14940.57  |
| sp P54886 P5CS_HUMAN  | 7428.319  | NaN        | 5085.8184 |
| sp P47895 AL1A3_HUMAN | 17046.96  | NaN        | 14487.832 |
| sp P30837 AL1B1_HUMAN | 861.0027  | NaN        | 22884.371 |
| sp P05091 ALDH2_HUMAN | 4959.2734 | 619.2818   | 530.1398  |
| sp P51648 AL3A2_HUMAN | 4924.26   | NaN        | 11656.408 |
| sp P43353 AL3B1_HUMAN | 1784.0701 | NaN        | 6669.4614 |
| sp Q02252 MMSA_HUMAN  | 584.3071  | NaN        | 8887.834  |
| sp P49419 AL7A1_HUMAN | 14004.54  | 151.25279  | 5431.6523 |
| sp P49189 AL9A1_HUMAN | 5355.593  | NaN        | 15290.612 |
| sp P04075 ALDOA_HUMAN | 34827.668 | 8777.8545  | 6016.6035 |
| sp P09972 ALDOC_HUMAN | 2962.1099 | 1161.1523  | 27310.36  |
| sp Q9BT22 ALG1_HUMAN  | 3228.5093 | NaN        | 343.92642 |
| sp Q9H553 ALG2_HUMAN  | 4423.91   | NaN        | 6799.1025 |
| sp Q9Y673 ALG5_HUMAN  | 2363.815  | NaN        | 10879.949 |
| sp P05186 PPBT_HUMAN  | 2455.4067 | NaN        | 348.09393 |
| sp Q86V81 THOC4_HUMAN | 616.12256 | NaN        | 9859.205  |

|                       |            |           |           |
|-----------------------|------------|-----------|-----------|
| sp P02760 AMBP_HUMAN  | 8955.685   | 6528.9746 | 1472.1002 |
| sp Q9Y303 NAGA_HUMAN  | 1395.2302  | NaN       | 5151.2017 |
| sp Q9Y2J4 AMOL2_HUMAN | 180.1962   | NaN       | 12623.637 |
| sp Q01433 AMPD2_HUMAN | 1044.5107  | NaN       | 11511.609 |
| sp P49418 AMPH_HUMAN  | 259.99646  | NaN       | 20487.854 |
| sp P04746 AMYP_HUMAN  | 1546.7367  | 289.92618 | 5739.533  |
| sp Q9UKU9 ANGL2_HUMAN | 223.80627  | NaN       | 2377.862  |
| sp Q9P2R3 ANFY1_HUMAN | 4002.8928  | NaN       | 941.3776  |
| sp Q8IZ07 AN13A_HUMAN | 4251.6006  | NaN       | 5939.61   |
| sp O15084 ANR28_HUMAN | 653.93     | NaN       | 3276.557  |
| sp Q9NW15 ANO10_HUMAN | 5337.5195  | 1636.9127 | 8682.667  |
| sp Q4KMQ2 ANO6_HUMAN  | 3606.6443  | NaN       | 3059.7122 |
| sp P39687 AN32A_HUMAN | 2125.654   | NaN       | 771.8324  |
| sp Q92688 AN32B_HUMAN | 176.53188  | NaN       | 279.47684 |
| sp Q9BTT0 AN32E_HUMAN | 331.13922  | NaN       | 4494.908  |
| sp P15144 AMPN_HUMAN  | 14963.3955 | NaN       | 3638.3086 |
| sp Q9H6X2 ANTR1_HUMAN | 4238.098   | 91.76     | 24253.377 |
| sp P58335 ANTR2_HUMAN | 3224.457   | NaN       | 8966.382  |
| sp P04083 ANXA1_HUMAN | 201218.9   | 17701.984 | 8235.747  |
| sp P50995 ANX11_HUMAN | 16141.168  | 1809.5227 | 3281.3599 |
| sp P07355 ANXA2_HUMAN | 310493.8   | 33631.17  | 6687.031  |
| sp P12429 ANXA3_HUMAN | 8779.391   | NaN       | 8692.793  |
| sp P09525 ANXA4_HUMAN | 20488.742  | 3409.9846 | 12256.412 |
| sp P08758 ANXA5_HUMAN | 172161.88  | 17325.92  | 15048.378 |
| sp P08133 ANXA6_HUMAN | 146314.86  | 7377.661  | 26273.76  |
| sp P20073 ANXA7_HUMAN | 12942.181  | 919.63965 | 8371.963  |
| sp O75106 AOC2_HUMAN  | 1267.4272  | NaN       | 32586.395 |
| sp Q10567 AP1B1_HUMAN | 12778.731  | 820.43054 | 1447.8958 |
| sp O43747 AP1G1_HUMAN | 1597.7224  | NaN       | 19388.934 |
| sp Q9BXS5 AP1M1_HUMAN | 4836.386   | NaN       | 1229.4689 |
| sp P61966 AP1S1_HUMAN | 772.5262   | NaN       | 19698.877 |
| sp O95782 AP2A1_HUMAN | 10886.188  | NaN       | 6043.1353 |
| sp O94973 AP2A2_HUMAN | 4203.9204  | NaN       | 11552.305 |



|                       |           |           |            |
|-----------------------|-----------|-----------|------------|
| sp P63010 AP2B1_HUMAN | 5190.247  | NaN       | 12351.137  |
| sp Q96CW1 AP2M1_HUMAN | 14989.996 | NaN       | 28413.736  |
| sp P53680 AP2S1_HUMAN | 1442.8018 | NaN       | 7562.698   |
| sp O00203 AP3B1_HUMAN | 5958.749  | 376.94485 | 10374.878  |
| sp O14617 AP3D1_HUMAN | 3644.9524 | NaN       | 14249.952  |
| sp Q9Y2T2 AP3M1_HUMAN | 3189.9128 | NaN       | 23185.822  |
| sp Q92572 AP3S1_HUMAN | 973.12714 | NaN       | 15504.749  |
| sp P13798 ACPH_HUMAN  | 4266.5728 | NaN       | 6876.3657  |
| sp P27695 APEX1_HUMAN | 6888.871  | NaN       | 1570.6892  |
| sp Q96BI3 APH1A_HUMAN | 720.28577 | NaN       | 16228.586  |
| sp Q8WW43 APH1B_HUMAN | 285.79758 | NaN       | 10014.0205 |
| sp Q9BZZ5 API5_HUMAN  | 349.62317 | NaN       | 9288.61    |
| sp Q06481 APLP2_HUMAN | 5934.165  | NaN       | 10093.719  |
| sp Q9HDC9 APMAP_HUMAN | 9850.699  | 1467.98   | 10552.908  |
| sp P02647 APOA1_HUMAN | 19722.398 | 13725.328 | 2810.9082  |
| sp P02652 APOA2_HUMAN | 859.0045  | 1160.4952 | 3614.157   |
| sp P06727 APOA4_HUMAN | 3263.0999 | 462.4463  | 7351.015   |
| sp P04114 APOB_HUMAN  | 9930.184  | 2671.026  | 11104.701  |
| sp Q9NRW3 ABC3C_HUMAN | 2273.006  | NaN       | 174.80054  |
| sp P02656 APOC3_HUMAN | 17065.482 | 748.4058  | 4193.2905  |
| sp P02649 APOE_HUMAN  | 8651.611  | 1226.0416 | 43019.93   |
| sp P02749 APOH_HUMAN  | 6909.1665 | 1115.5247 | 15537.513  |
| sp Q9BQE5 APOL2_HUMAN | 4115.4854 | 1068.5967 | 3962.4253  |
| sp O95445 APOM_HUMAN  | 212.00978 | NaN       | 284.02527  |
| sp Q6UXV4 MIC27_HUMAN | 83.06569  | NaN       | 1436.4304  |
| sp P05067 A4_HUMAN    | 7073.3506 | NaN       | 2851.9512  |
| sp Q8NEU8 DP13B_HUMAN | 4249.7637 | NaN       | 26523.684  |
| sp P07741 APT_HUMAN   | 7726.619  | 158.95462 | 9667.773   |
| sp Q96P48 ARAP1_HUMAN | 317.51605 | NaN       | 5477.716   |
| sp P48444 COPD_HUMAN  | 7207.8086 | NaN       | 1395.5874  |
| sp P61204 ARF3_HUMAN  | 13543.308 | 1597.1271 | 5809.4365  |
| sp P18085 ARF4_HUMAN  | 21622.258 | 1150.0178 | 10000.189  |
| sp P84085 ARF5_HUMAN  | 2121.888  | NaN       | 3641.8645  |

|                       |           |           |            |
|-----------------------|-----------|-----------|------------|
| sp P62330 ARF6_HUMAN  | 5907.751  | NaN       | 9077.371   |
| sp Q8N6T3 ARFG1_HUMAN | 1034.6937 | NaN       | 24898      |
| sp Q8N6H7 ARFG2_HUMAN | 248.37779 | NaN       | 2373.8296  |
| sp Q9Y6D6 BIG1_HUMAN  | 641.6954  | NaN       | 12755.492  |
| sp Q9Y6D5 BIG2_HUMAN  | 3298.433  | NaN       | 6786.1777  |
| sp P53367 ARFP1_HUMAN | 2021.4989 | NaN       | 8232.502   |
| sp Q13795 ARFRP_HUMAN | 222.06317 | NaN       | 3297.8325  |
| sp Q07960 RHG01_HUMAN | 5014.708  | NaN       | 4474.869   |
| sp Q68EM7 RHG17_HUMAN | 1663.3335 | NaN       | 2241.7341  |
| sp Q9NRY4 RHG35_HUMAN | 330.58508 | NaN       | 5434.2607  |
| sp P52565 GDIR1_HUMAN | 17810.36  | 1174.8566 | 33990.867  |
| sp Q92888 ARHG1_HUMAN | 5689.2246 | NaN       | 5316.177   |
| sp O15013 ARHGA_HUMAN | 2254.5498 | NaN       | 1479.9464  |
| sp Q9Y4X5 ARI1_HUMAN  | 477.947   | NaN       | 12369.671  |
| sp P40616 ARL1_HUMAN  | 8095.9937 | NaN       | 37261.8    |
| sp P36404 ARL2_HUMAN  | 1571.5192 | NaN       | 2003.7097  |
| sp P36405 ARL3_HUMAN  | 3696.5862 | NaN       | 3451.0833  |
| sp Q9H0F7 ARL6_HUMAN  | 599.54456 | NaN       | 2611.8894  |
| sp Q15041 AR6P1_HUMAN | 5729.752  | NaN       | 2736.1858  |
| sp O75915 PRAF3_HUMAN | 4530.3794 | NaN       | 17903.195  |
| sp Q96BM9 ARL8A_HUMAN | 976.1629  | NaN       | 3313.9888  |
| sp Q9NVJ2 ARL8B_HUMAN | 4357.6875 | 514.9091  | 14925.87   |
| sp Q6NxE6 ARMC6_HUMAN | 886.81726 | NaN       | 3308.0103  |
| sp Q7Z3E5 ARMC9_HUMAN | 431.7297  | NaN       | 10838.2705 |
| sp Q9P291 ARMX1_HUMAN | 353.76294 | NaN       | 3734.9817  |
| sp Q7L311 ARMX2_HUMAN | 206.82494 | NaN       | 10475.97   |
| sp Q9UH62 ARMX3_HUMAN | 4213.5376 | NaN       | 3609.7283  |
| sp Q9H993 ARMT1_HUMAN | 535.21716 | NaN       | 6967.1426  |
| sp Q92747 ARC1A_HUMAN | 2368.31   | 434.7789  | 258.08243  |
| sp O15143 ARC1B_HUMAN | 11262.293 | 164.6075  | 4365.948   |
| sp O15144 ARPC2_HUMAN | 12811.502 | 244.02115 | 5741.957   |
| sp O15145 ARPC3_HUMAN | 6431.3887 | 843.1821  | 116.35126  |
| sp P59998 ARPC4_HUMAN | 7688.9893 | 304.67282 | 16342.773  |

|                       |           |           |            |
|-----------------------|-----------|-----------|------------|
| sp O15511 ARPC5_HUMAN | 5943.0503 | 280.64005 | 172.86118  |
| sp Q9BPX5 ARP5L_HUMAN | 2079.6162 | NaN       | 14359.436  |
| sp P56211 ARP19_HUMAN | 213.76053 | NaN       | 739.4995   |
| sp P15289 ARSA_HUMAN  | 1745.1675 | NaN       | 1048.1887  |
| sp Q13510 ASAH1_HUMAN | 2397.8958 | 1104.7007 | 32547.299  |
| sp Q8N3C0 ASCC3_HUMAN | 1197.3613 | NaN       | 11606.443  |
| sp P04424 ARLY_HUMAN  | 847.9665  | NaN       | 8018.5815  |
| sp O95671 ASML_HUMAN  | 0         | NaN       | 2197.9072  |
| sp P08243 ASNS_HUMAN  | 1096.8658 | NaN       | 28426.02   |
| sp Q12797 ASPH_HUMAN  | 11039.689 | 1712.2426 | 10272.183  |
| sp Q9NVI7 ATD3A_HUMAN | 8118.174  | NaN       | 14685.61   |
| sp Q5T9A4 ATD3B_HUMAN | 978.7982  | NaN       | 4357.1714  |
| sp Q9NT62 ATG3_HUMAN  | 1885.9095 | NaN       | 14066.602  |
| sp Q9Y4P1 ATG4B_HUMAN | 810.22205 | NaN       | 17366.549  |
| sp Q9H1Y0 ATG5_HUMAN  | 487.83154 | NaN       | 15221.776  |
| sp Q7Z3C6 ATG9A_HUMAN | 1432.8766 | NaN       | 13252.8545 |
| sp P31939 PUR9_HUMAN  | 8766.767  | 784.89984 | 2494.7332  |
| sp Q8WXF7 ATLA1_HUMAN | 5371.003  | NaN       | 2468.6353  |
| sp Q8NHH9 ATLA2_HUMAN | 558.76917 | NaN       | 13897.82   |
| sp Q6DD88 ATLA3_HUMAN | 15096.32  | 1028.2068 | 3731.614   |
| sp O00244 ATOX1_HUMAN | 1277.0669 | NaN       | 30479.752  |
| sp P98196 AT11A_HUMAN | 188.9226  | NaN       | 19246.754  |
| sp Q8NB49 AT11C_HUMAN | 1167.7455 | NaN       | 9639.482   |
| sp Q9HD20 AT131_HUMAN | 4170.872  | NaN       | 6447.117   |
| sp P05023 AT1A1_HUMAN | 48766.43  | 3694.9863 | 4305.0137  |
| sp P50993 AT1A2_HUMAN | 1013.6194 | NaN       | 33211.535  |
| sp P05026 AT1B1_HUMAN | 7003.0024 | NaN       | 18725.209  |
| sp P54709 AT1B3_HUMAN | 32766.719 | 1037.537  | 2244.2073  |
| sp P16615 AT2A2_HUMAN | 9611.716  | 2589.852  | 83671.414  |
| sp Q93084 AT2A3_HUMAN | 3413.2522 | NaN       | 44432.137  |
| sp P20020 AT2B1_HUMAN | 9715.745  | NaN       | 8312.368   |
| sp P23634 AT2B4_HUMAN | 14215.769 | 2450.8135 | 21840.664  |
| sp P98194 AT2C1_HUMAN | 9114.61   | NaN       | 4284.675   |

|                       |            |            |           |
|-----------------------|------------|------------|-----------|
| sp P25705 ATPA_HUMAN  | 32300.133  | 6612.498   | 8162.09   |
| sp P06576 ATPB_HUMAN  | 40863.477  | 7017.5376  | 6434.948  |
| sp P36542 ATPG_HUMAN  | 12507.014  | 327.35767  | 9356.295  |
| sp P30049 ATPD_HUMAN  | 4553.849   | 963.4248   | 13609.665 |
| sp P56381 ATP5E_HUMAN | 752.5665   | NaN        | 9349.877  |
| sp P56385 ATP5I_HUMAN | 6837.0103  | NaN        | 2270.9375 |
| sp P56134 ATPK_HUMAN  | 2534.606   | NaN        | 25166.682 |
| sp O75964 ATP5L_HUMAN | 6427.318   | 3173.5176  | 24463.621 |
| sp P56378 ATP68_HUMAN | 878.2181   | NaN        | 73554.68  |
| sp Q96IX5 ATPMK_HUMAN | 1479.7743  | 288.92862  | 28920.287 |
| sp P24539 AT5F1_HUMAN | 9622.528   | 1020.81726 | 3249.5544 |
| sp O75947 ATP5H_HUMAN | 6756.885   | 261.42313  | 1748.1045 |
| sp P18859 ATP5J_HUMAN | 7314.8633  | 1318.5256  | 22897.307 |
| sp P48047 ATPO_HUMAN  | 14996.078  | 2240.6047  | 2279.5396 |
| sp Q15904 VAS1_HUMAN  | 3975.4038  | NaN        | 17094.81  |
| sp O75787 RENR_HUMAN  | 2047.4863  | 9059.565   | 23932.09  |
| sp Q93050 VPP1_HUMAN  | 12783.423  | 363.89056  | 31846.191 |
| sp Q9Y487 VPP2_HUMAN  | 1471.8301  | NaN        | 12357.352 |
| sp P27449 VATL_HUMAN  | 7509.3965  | NaN        | 4409.237  |
| sp P61421 VA0D1_HUMAN | 9934.338   | 733.11755  | 5483.63   |
| sp P38606 VATA_HUMAN  | 8750.485   | 602.2843   | 19706.965 |
| sp P21281 VATB2_HUMAN | 11102.7705 | 18532.627  | 11463.497 |
| sp P21283 VATC1_HUMAN | 7246.1963  | NaN        | 1530.733  |
| sp Q9Y5K8 VATD_HUMAN  | 3946.5728  | NaN        | 3917.6494 |
| sp P36543 VATE1_HUMAN | 13512.354  | NaN        | 12102.12  |
| sp Q16864 VATF_HUMAN  | 2516.5183  | NaN        | 320.86838 |
| sp O75348 VATG1_HUMAN | 6974.826   | 1198.7026  | 52239.04  |
| sp Q9UI12 VATH_HUMAN  | 4184.8843  | NaN        | 304.6766  |
| sp Q04656 ATP7A_HUMAN | 258.41156  | NaN        | 8786.439  |
| sp O43520 AT8B1_HUMAN | 464.9513   | NaN        | 258.40674 |
| sp O75882 ATRN_HUMAN  | 971.072    | NaN        | 19411.156 |
| sp Q9UBB4 ATX10_HUMAN | 2488.1328  | NaN        | 49773.16  |
| sp Q9Y679 AUP1_HUMAN  | 3760.399   | NaN        | 71.67945  |

|                       |           |           |           |
|-----------------------|-----------|-----------|-----------|
| sp P30530 UFO_HUMAN   | 11418.113 | NaN       | 4866.2427 |
| sp P25311 ZA2G_HUMAN  | 1504.9756 | 268.82596 | 21801.646 |
| sp P61769 B2MG_HUMAN  | 22764.492 | 1740.6981 | 8697.785  |
| sp Q96L58 B3GT6_HUMAN | 228.92258 | NaN       | 13985.926 |
| sp Q6Y288 B3GLT_HUMAN | 657.76025 | NaN       | 6783.7485 |
| sp P15291 B4GT1_HUMAN | 1323.2711 | NaN       | 72781.14  |
| sp P56817 BACE1_HUMAN | 368.26355 | NaN       | 298.1663  |
| sp O95816 BAG2_HUMAN  | 7834.1855 | NaN       | 10467.96  |
| sp Q9UL15 BAG5_HUMAN  | 571.38354 | NaN       | 3918.1313 |
| sp P46379 BAG6_HUMAN  | 2815.2854 | NaN       | 4454.843  |
| sp O75531 BAF_HUMAN   | 2794.3574 | NaN       | 11373.84  |
| sp P80723 BASP1_HUMAN | 19512.93  | 2244.856  | 10251.961 |
| sp Q07812 BAX_HUMAN   | 5424.049  | 241.53647 | 26999.299 |
| sp Q9UHQ4 BAP29_HUMAN | 2505.5469 | NaN       | 21442.635 |
| sp P51572 BAP31_HUMAN | 5164.049  | 2008.2253 | 12513.683 |
| sp O75815 BCAR3_HUMAN | 598.524   | NaN       | 15434.299 |
| sp P54687 BCAT1_HUMAN | 8404.436  | NaN       | 9379.827  |
| sp Q9HB09 B2L12_HUMAN | 410.6123  | NaN       | 62869.88  |
| sp Q9BXK5 B2L13_HUMAN | 0         | NaN       | 5550.4565 |
| sp Q9Y276 BCS1_HUMAN  | 319.24173 | NaN       | 5101.7783 |
| sp Q9BUT1 DHRS6_HUMAN | 2432.9648 | NaN       | 3057.9167 |
| sp P30411 BKRB2_HUMAN | 4554.6763 | NaN       | 3439.7207 |
| sp O15155 BET1_HUMAN  | 1440.6495 | NaN       | 35747.312 |
| sp Q9NYM9 BET1L_HUMAN | 428.27188 | NaN       | 3145.2363 |
| sp P55957 BID_HUMAN   | 841.1412  | NaN       | 831.7771  |
| sp Q13867 BLMH_HUMAN  | 1582.3125 | NaN       | 361.03015 |
| sp P53004 BIEA_HUMAN  | 3709.2922 | NaN       | 4643.6533 |
| sp P30043 BLVRB_HUMAN | 51298.54  | 230.85892 | 24285.19  |
| sp P36894 BMR1A_HUMAN | 274.02478 | NaN       | 5305.092  |
| sp Q9H3K6 BOLA2_HUMAN | 1339.0143 | NaN       | 3877.059  |
| sp O95861 BPNT1_HUMAN | 1045.293  | NaN       | 11996.391 |
| sp Q9NX62 IMPA3_HUMAN | 3708.3281 | NaN       | 6391.0615 |
| sp P46736 BRCC3_HUMAN | 587.27563 | NaN       | 9211.716  |

|                       |           |           |           |
|-----------------------|-----------|-----------|-----------|
| sp Q9H8M2 BRD9_HUMAN  | 3510.063  | 308.69168 | 11833.902 |
| sp O95415 BRI3_HUMAN  | 2568.0596 | NaN       | 13825.279 |
| sp Q8WY22 BRI3B_HUMAN | 927.9713  | NaN       | 13718.935 |
| sp Q8WUW1 BRK1_HUMAN  | 2364.0352 | NaN       | 16516.201 |
| sp Q5VW32 BROX_HUMAN  | 1730.3184 | NaN       | 22588.285 |
| sp Q9NW68 BSDC1_HUMAN | 534.66516 | NaN       | 10846.282 |
| sp P35613 BASI_HUMAN  | 28966.701 | 420.82245 | 3807.5264 |
| sp Q10588 BST1_HUMAN  | 502.09842 | NaN       | 16870.266 |
| sp P20290 BTF3_HUMAN  | 1399.3375 | NaN       | 14259.602 |
| sp Q96K17 BT3L4_HUMAN | 501.41245 | NaN       | 18854.816 |
| sp Q7KYR7 BT2A1_HUMAN | 919.41003 | NaN       | 5710.3496 |
| sp O00478 BT3A3_HUMAN | 458.86685 | NaN       | 4948.6646 |
| sp O43684 BUB3_HUMAN  | 7329.545  | NaN       | 4311.4    |
| sp Q7L1Q6 5MP2_HUMAN  | 3798.5508 | NaN       | 2802.557  |
| sp Q9H3H3 CK068_HUMAN | 1946.7466 | NaN       | 3671.8267 |
| sp Q99622 C10_HUMAN   | 550.67957 | NaN       | 790.56934 |
| sp Q9NSK7 CS012_HUMAN | 229.31906 | NaN       | 6644.4375 |
| sp Q9UFG5 CS025_HUMAN | 125.34637 | NaN       | 12754.549 |
| sp Q9NS00 C1GLT_HUMAN | 33412.113 | NaN       | 5757.2686 |
| sp P02746 C1QB_HUMAN  | NaN       | 237.63545 | 3301.4458 |
| sp Q07021 C1QBP_HUMAN | 15880.963 | 1422.016  | 16037.397 |
| sp P00736 C1R_HUMAN   | 1682.5603 | NaN       | 5002.2246 |
| sp P09871 C1S_HUMAN   | 1364.6511 | 1416.9271 | 140.10507 |
| sp Q86YS7 C2CD5_HUMAN | 3067.0757 | NaN       | 2583.1062 |
| sp P01024 CO3_HUMAN   | 18047.223 | 8890.681  | 24241.502 |
| sp P0C0L4 CO4A_HUMAN  | 6794.562  | 2192.6077 | 1399.259  |
| sp P04003 C4BPA_HUMAN | 1334.049  | NaN       | 6392.182  |
| sp Q5BLP8 CD048_HUMAN | 1589.3062 | 1620.1724 | 12213.62  |
| sp P01031 CO5_HUMAN   | 914.3092  | NaN       | 6249.8047 |
| sp Q7Z4R8 CF120_HUMAN | 594.96674 | NaN       | 9592.144  |
| sp P02748 CO9_HUMAN   | 1147.318  | 825.9942  | 12905.864 |
| sp Q5T6V5 QSPP_HUMAN  | 360.89648 | NaN       | 3570.0452 |
| sp Q9Y376 CAB39_HUMAN | 2031.5413 | NaN       | 9853.057  |

|                       |            |           |           |
|-----------------------|------------|-----------|-----------|
| sp P54289 CA2D1_HUMAN | 6179.875   | NaN       | 20541.506 |
| sp Q9BXT2 CCG6_HUMAN  | 1791.7164  | NaN       | 6969.5737 |
| sp Q9HB71 CYBP_HUMAN  | 860.18317  | NaN       | 34721     |
| sp P27708 PYR1_HUMAN  | 8459.838   | NaN       | 4063.9868 |
| sp Q9BY67 CADM1_HUMAN | 524.09827  | NaN       | 9337.785  |
| sp Q9P1Z2 CACO1_HUMAN | 1930.8087  | NaN       | 25709.643 |
| sp Q13137 CACO2_HUMAN | 14095.599  | NaN       | 540.88074 |
| sp Q05682 CALD1_HUMAN | 8754.498   | 1928.8092 | 43221.125 |
| sp Q9HA72 CAHM2_HUMAN | 747.1309   | NaN       | 6645.023  |
| sp Q8N5C1 CAHM5_HUMAN | 10851.559  | NaN       | 15866.165 |
| sp P0DP23 CALM1_HUMAN | 17558.51   | 5399.0312 | 195.64746 |
| sp P27797 CALR_HUMAN  | 60124.82   | 8795.164  | 11802.439 |
| sp O43852 CALU_HUMAN  | 33393.56   | 5637.383  | 11471.836 |
| sp Q13557 KCC2D_HUMAN | 8694.406   | NaN       | 33756.57  |
| sp Q86VP6 CAND1_HUMAN | 6965.338   | NaN       | 78882.24  |
| sp P27824 CALX_HUMAN  | 35758.785  | 5273.4946 | 23856.246 |
| sp Q01518 CAP1_HUMAN  | 16084.132  | 3424.6873 | 39007.016 |
| sp P40123 CAP2_HUMAN  | 2563.2034  | NaN       | 9619.715  |
| sp P40121 CAPG_HUMAN  | 4797.014   | NaN       | 25908.861 |
| sp P07384 CAN1_HUMAN  | 11830.502  | NaN       | 18176.742 |
| sp P17655 CAN2_HUMAN  | 12619.366  | 840.17084 | 12380.88  |
| sp O15484 CAN5_HUMAN  | 847.6226   | NaN       | 48766.465 |
| sp P04632 CPNS1_HUMAN | 8795.072   | 1193.9922 | 6770.668  |
| sp Q14444 CAPR1_HUMAN | 4246.947   | NaN       | 11480.341 |
| sp P52907 CAZA1_HUMAN | 8108.1855  | 2275.846  | 16355.374 |
| sp P47755 CAZA2_HUMAN | 7246.445   | 352.713   | 9881.078  |
| sp P47756 CAPZB_HUMAN | 10808.2705 | 1040.396  | 3944.6287 |
| sp Q9Y2V2 CHSP1_HUMAN | 3078.9385  | NaN       | 13634.289 |
| sp Q86X55 CARM1_HUMAN | 1674.8118  | NaN       | 8796.929  |
| sp Q5VZK9 CARL1_HUMAN | NaN        | 391.2723  | 2752.739  |
| sp P49589 SYCC_HUMAN  | 1978.502   | NaN       | 9220.434  |
| sp Q9HA77 SYCM_HUMAN  | 1594.0471  | NaN       | 262.82498 |
| sp O14936 CSKP_HUMAN  | 920.1863   | NaN       | 3774.3325 |

|                       |           |           |           |
|-----------------------|-----------|-----------|-----------|
| sp P55212 CASP6_HUMAN | 576.13116 | NaN       | 21606.2   |
| sp P20810 ICAL_HUMAN  | 2814.939  | NaN       | 1311.103  |
| sp P04040 CATA_HUMAN  | 15685.2   | 329.79843 | 5553.394  |
| sp Q03135 CAV1_HUMAN  | 19496.979 | 1775.5876 | 25438.443 |
| sp P51636 CAV2_HUMAN  | 4059.9578 | NaN       | 8142.5957 |
| sp Q6NZI2 CAVN1_HUMAN | 19998.754 | 5683.451  | 5531.1514 |
| sp O95810 CAVN2_HUMAN | 3961.054  | NaN       | 11427.961 |
| sp Q969G5 CAVN3_HUMAN | 6103.9126 | NaN       | 30626.541 |
| sp P16152 CBR1_HUMAN  | 16145.916 | 219.23117 | 6341.041  |
| sp O75828 CBR3_HUMAN  | 3966.1152 | NaN       | 28523.672 |
| sp Q13185 CBX3_HUMAN  | 2164.533  | NaN       | 20870.81  |
| sp P45973 CBX5_HUMAN  | 556.23816 | NaN       | 14912.631 |
| sp Q6P1N0 C2D1A_HUMAN | 912.1801  | NaN       | 20115.947 |
| sp Q8IX12 CCAR1_HUMAN | 708.01086 | NaN       | 5314.7686 |
| sp Q8N163 CCAR2_HUMAN | 1264.1158 | NaN       | 4905.3516 |
| sp Q9H6E4 CC134_HUMAN | 448.95905 | NaN       | 1226.5702 |
| sp Q8IYT3 CC170_HUMAN | NaN       | 412.25174 | 21325.855 |
| sp Q96A33 CCD47_HUMAN | 9180.558  | NaN       | 208.97577 |
| sp Q9BSQ5 CCM2_HUMAN  | 1727.6416 | NaN       | 19999.049 |
| sp O00622 CCN1_HUMAN  | 8827.452  | NaN       | 7257.089  |
| sp P29279 CCN2_HUMAN  | 762.2817  | NaN       | 13237.637 |
| sp Q8ND76 CCNY_HUMAN  | 590.7664  | NaN       | 2503.738  |
| sp Q9ULG6 CCPG1_HUMAN | 2688.0322 | NaN       | 34929.78  |
| sp P78371 TCPB_HUMAN  | 14748.496 | 1767.153  | 7518.1055 |
| sp P49368 TCPG_HUMAN  | 21444.393 | 406.71597 | 25310.166 |
| sp P50991 TCPD_HUMAN  | 18954.066 | NaN       | 19395.629 |
| sp P48643 TCPE_HUMAN  | 10321.24  | 601.955   | 6500.0107 |
| sp P40227 TCPZ_HUMAN  | 13238.609 | 434.2104  | 8202.891  |
| sp Q99832 TCPH_HUMAN  | 10695.644 | 1782.7134 | 6525.6987 |
| sp P50990 TCPQ_HUMAN  | 11496.133 | 4579.6763 | 14024.758 |
| sp P86790 CCZ1B_HUMAN | 1513.4148 | NaN       | 1192.3501 |
| sp Q6YHK3 CD109_HUMAN | 9161.01   | NaN       | 2995.2803 |
| sp P48509 CD151_HUMAN | 26974.49  | 1085.2191 | 5545.698  |



|                       |           |           |           |
|-----------------------|-----------|-----------|-----------|
| sp Q9HCU0 CD248_HUMAN | 8760.542  | NaN       | 818.4199  |
| sp Q9NZQ7 PD1L1_HUMAN | 853.67163 | NaN       | 4824.213  |
| sp Q5ZPR3 CD276_HUMAN | 19605.248 | 229.64717 | 5463.723  |
| sp Q8IX05 CD302_HUMAN | 438.72833 | NaN       | 2339.8088 |
| sp Q9NPF0 CD320_HUMAN | 869.86414 | NaN       | 4013.586  |
| sp P16070 CD44_HUMAN  | 105729.36 | 9028.498  | 5238.9355 |
| sp P15529 MCP_HUMAN   | 3406.2012 | NaN       | 13583.612 |
| sp Q08722 CD47_HUMAN  | 6163.3833 | 746.78864 | 8140.1187 |
| sp P08174 DAF_HUMAN   | 9249.328  | NaN       | 8307.771  |
| sp P13987 CD59_HUMAN  | 75473.58  | 2942.819  | 1101.5825 |
| sp P08962 CD63_HUMAN  | 46984.723 | 6586.0093 | 19933.72  |
| sp P34810 CD68_HUMAN  | 3401.9097 | NaN       | 29085.57  |
| sp P60033 CD81_HUMAN  | 29037.844 | 982.78033 | 9448.282  |
| sp P27701 CD82_HUMAN  | 10338.818 | 1837.9099 | 17983.902 |
| sp P21926 CD9_HUMAN   | 8239.529  | 306.59695 | 3033.6125 |
| sp P14209 CD99_HUMAN  | 4291.9014 | 220.21442 | 4283.0254 |
| sp Q8TCZ2 C99L2_HUMAN | 2915.1904 | NaN       | 18099.08  |
| sp Q9UJX2 CDC23_HUMAN | 744.0526  | NaN       | 17604.598 |
| sp Q16543 CDC37_HUMAN | 4529.5815 | NaN       | 6851.0405 |
| sp P60953 CDC42_HUMAN | 25588.535 | 517.39465 | 11532.877 |
| sp Q9Y5S2 MRCKB_HUMAN | 486.80814 | NaN       | 1581.3502 |
| sp Q9NRR8 C42S1_HUMAN | 248.22842 | NaN       | 4224.244  |
| sp Q9H5V8 CDCP1_HUMAN | 2860.8472 | NaN       | 308.6851  |
| sp P55287 CAD11_HUMAN | 2251.0808 | NaN       | 10186.786 |
| sp P55290 CAD13_HUMAN | 1102.4124 | NaN       | 3832.145  |
| sp P55285 CADH6_HUMAN | 6027.58   | NaN       | 2280.6555 |
| sp O14735 CDIPT_HUMAN | 6196.6123 | NaN       | 4318.8647 |
| sp P06493 CDK1_HUMAN  | 5197.6143 | NaN       | 7374.534  |
| sp P24941 CDK2_HUMAN  | 136.72258 | NaN       | 10243.615 |
| sp Q00535 CDK5_HUMAN  | 726.775   | NaN       | 16447.307 |
| sp Q96JB5 CK5P3_HUMAN | 1175.5625 | NaN       | 2991.111  |
| sp Q96HQ2 C2AIL_HUMAN | 465.74475 | NaN       | 13227.675 |
| sp O95674 CDS2_HUMAN  | 1277.7429 | NaN       | 8721.22   |

|                       |           |           |           |
|-----------------------|-----------|-----------|-----------|
| sp Q9UKY7 CDV3_HUMAN  | 136.11603 | NaN       | 35456.47  |
| sp Q92879 CELF1_HUMAN | 1866      | NaN       | 1512.7225 |
| sp Q9UHN6 CEIP2_HUMAN | 642.7034  | 195.27954 | 3807.133  |
| sp P07199 CENPB_HUMAN | 241.66022 | NaN       | 8599.122  |
| sp Q9Y6K0 CEPT1_HUMAN | 4754.1553 | NaN       | 7504.504  |
| sp Q96G23 CERS2_HUMAN | 4419.1626 | NaN       | 4020.943  |
| sp P41208 CETN2_HUMAN | 482.107   | NaN       | 5039.003  |
| sp P00751 CFAB_HUMAN  | 5284.7026 | 2690.6956 | 13251.065 |
| sp P08603 CFAH_HUMAN  | 1820.2739 | 140.03374 | 9404.711  |
| sp P05156 CFAI_HUMAN  | 1640.6556 | 2530.4397 | 10841.082 |
| sp P23528 COF1_HUMAN  | 44321.41  | 8307.335  | 1867.8619 |
| sp Q9Y281 COF2_HUMAN  | 4322.1064 | 305.26028 | 3026.1245 |
| sp Q9NX63 MIC19_HUMAN | 1410.0399 | 890.5794  | 8647.353  |
| sp Q9UKJ5 CHIC2_HUMAN | 357.01813 | NaN       | 2864.0144 |
| sp Q9BWS9 CHID1_HUMAN | 3406.9575 | NaN       | 2133.471  |
| sp P24386 RAE1_HUMAN  | 250.54826 | NaN       | 6152.088  |
| sp Q9HD42 CHM1A_HUMAN | 657.34326 | NaN       | 26412.53  |
| sp O43633 CHM2A_HUMAN | 1358.2281 | NaN       | 10034.723 |
| sp Q9BY43 CHM4A_HUMAN | 0         | NaN       | 1676.9132 |
| sp Q9H444 CHM4B_HUMAN | 3380.6594 | NaN       | 1273.2346 |
| sp Q9NZZ3 CHMP5_HUMAN | 1080.2595 | NaN       | 14799.418 |
| sp Q96FZ7 CHMP6_HUMAN | 5944.82   | NaN       | 13697.043 |
| sp Q8WUX9 CHMP7_HUMAN | 112.19716 | NaN       | 11286.824 |
| sp Q9UHD1 CHRD1_HUMAN | 10422.922 | NaN       | 1245.0864 |
| sp Q99653 CHP1_HUMAN  | 7954.6816 | NaN       | 28391.277 |
| sp Q9P2E5 CHPF2_HUMAN | 1103.7412 | NaN       | 16477.451 |
| sp Q8NCH0 CHSTE_HUMAN | 470.288   | NaN       | 4415.0024 |
| sp O76071 CIAO1_HUMAN | 1529.6228 | NaN       | 12732.969 |
| sp Q9NZ45 CISD1_HUMAN | 3300.0742 | NaN       | 8473.554  |
| sp Q8N5K1 CISD2_HUMAN | 3363.4194 | NaN       | 3083.8845 |
| sp Q07065 CKAP4_HUMAN | 48392.867 | 8965.296  | 4116.2837 |
| sp Q14008 CKAP5_HUMAN | 3146.549  | NaN       | 1484.8752 |
| sp P12277 KCRB_HUMAN  | 3206.522  | NaN       | 19586.54  |

|                       |           |           |            |
|-----------------------|-----------|-----------|------------|
| sp Q9UBR5 CKLF_HUMAN  | 0         | NaN       | 13472.0625 |
| sp P33552 CKS2_HUMAN  | 400.2189  | NaN       | 20001.342  |
| sp Q7Z460 CLAP1_HUMAN | 1140.9738 | NaN       | 9715.588   |
| sp O75122 CLAP2_HUMAN | 0         | NaN       | 12049.766  |
| sp Q96S66 CLCC1_HUMAN | 1314.4332 | NaN       | 6933.8486  |
| sp P51790 CLCN3_HUMAN | 618.16534 | NaN       | 11564.225  |
| sp P51798 CLCN7_HUMAN | 3939.3342 | NaN       | 6057.148   |
| sp O75508 CLD11_HUMAN | 3676.4836 | NaN       | 6686.595   |
| sp Q9NY35 CLDN1_HUMAN | 1932.1794 | NaN       | 6903.214   |
| sp P05452 TETN_HUMAN  | 8525.815  | 4413.25   | 1038.7529  |
| sp O00299 CLIC1_HUMAN | 13069.872 | 4224.835  | 1249.5739  |
| sp Q9Y696 CLIC4_HUMAN | 35431.32  | NaN       | 1403.4023  |
| sp Q14677 EPN4_HUMAN  | 883.69965 | NaN       | 7918.195   |
| sp P30622 CLIP1_HUMAN | 548.178   | NaN       | 9193.953   |
| sp Q9H6B4 CLMP_HUMAN  | 11847.214 | NaN       | 790.577    |
| sp Q13286 CLN3_HUMAN  | 1359.3916 | NaN       | 4943.9614  |
| sp Q16740 CLPP_HUMAN  | 3456.8906 | NaN       | 15719.419  |
| sp O96005 CLPT1_HUMAN | 9876.454  | NaN       | 14213.875  |
| sp Q96KA5 CLP1L_HUMAN | 216.54242 | NaN       | 18586.523  |
| sp P09496 CLCA_HUMAN  | 6605.969  | 221.89598 | 4502.2607  |
| sp P09497 CLCB_HUMAN  | 1614.4396 | 296.09705 | 4977.0645  |
| sp Q00610 CLH1_HUMAN  | 39458.113 | 3962.8994 | 1606.138   |
| sp P10909 CLUS_HUMAN  | 5626.783  | 307.32648 | 195.691    |
| sp Q96DG6 CMBL_HUMAN  | 310.61295 | NaN       | 1650.1594  |
| sp P30085 KCY_HUMAN   | 3645.1506 | NaN       | 3342.9204  |
| sp Q96MX0 CKLF3_HUMAN | 556.0744  | NaN       | 802.67993  |
| sp Q9NX76 CKLF6_HUMAN | 895.9306  | NaN       | 965.48834  |
| sp Q96FZ5 CKLF7_HUMAN | 282.5538  | NaN       | 4847.0913  |
| sp P62633 CNBP_HUMAN  | 2028.7056 | NaN       | 5385.8174  |
| sp Q96KP4 CNDP2_HUMAN | 2228.256  | 5984.106  | 6930.1577  |
| sp O95406 CNIH1_HUMAN | 128.39856 | NaN       | 750.4961   |
| sp Q9P003 CNIH4_HUMAN | 682.0591  | NaN       | 5937.8125  |
| sp Q99439 CNN2_HUMAN  | 5450.338  | NaN       | 9705.489   |

|                         |            |           |           |
|-------------------------|------------|-----------|-----------|
| sp Q15417 CNN3_HUMAN    | 3799.4446  | 228.21686 | 7440.022  |
| sp A5YKK6 CNOT1_HUMAN   | 306.618    | NaN       | 10270.411 |
| sp P09543 CN37_HUMAN    | 11784.385  | 352.1659  | 2125.2896 |
| sp Q9Y2B0 CNPY2_HUMAN   | 6680.189   | 237.09448 | 25723.871 |
| sp Q9BT09 CNPY3_HUMAN   | 1028.1191  | NaN       | 3851.2559 |
| sp Q8N129 CNPY4_HUMAN   | 4079.0222  | NaN       | 5229.539  |
| sp Q96F85 CNRP1_HUMAN   | 0          | NaN       | 3836.3103 |
| sp Q9P232 CNTN3_HUMAN   | 2748.3196  | 194.62729 | 1672.1049 |
| sp P78357 CNTP1_HUMAN   | 6481.0557  | NaN       | 2857.8835 |
| sp Q9Y2R0 COA3_HUMAN    | 1660.3801  | NaN       | 4276.5713 |
| sp Q13057 COASY_HUMAN   | 1184.4143  | NaN       | 3761.543  |
| sp Q9H9E3 COG4_HUMAN    | 261.00708  | NaN       | 7025.6123 |
| sp Q96MW5 COG8_HUMAN    | 334.31927  | NaN       | 20953.264 |
| sp P12107 COL11A1_HUMAN | 1074.4045  | NaN       | 7010.465  |
| sp Q99715 COL12A1_HUMAN | 9896.241   | NaN       | 1389.9922 |
| sp Q05707 COL14A1_HUMAN | 141.76547  | NaN       | 5965.6665 |
| sp P39060 COL18A1_HUMAN | 2050.0964  | NaN       | 526.681   |
| sp P02452 COL1A1_HUMAN  | 24730.441  | 6166.204  | 18397.404 |
| sp P08123 COL1A2_HUMAN  | 14836.1875 | 4027.6992 | 20316.986 |
| sp P02458 COL2A1_HUMAN  | 6360.1157  | NaN       | 700.3791  |
| sp P02461 COL3A1_HUMAN  | 10034.134  | 2660.8062 | 4841.9683 |
| sp P20908 COL5A1_HUMAN  | 1638.904   | NaN       | 4959.794  |
| sp P05997 COL5A2_HUMAN  | 911.8333   | NaN       | 950.32446 |
| sp P12109 COL6A1_HUMAN  | 7250.413   | 820.88635 | 2387.9387 |
| sp P12110 COL6A2_HUMAN  | 7932.827   | NaN       | 16975.447 |
| sp P12111 COL6A3_HUMAN  | 15145.74   | 8816.428  | 378.52777 |
| sp Q02388 COL7A1_HUMAN  | 225.86366  | NaN       | 1911.9609 |
| sp Q5KU26 COLEC12_HUMAN | 7526.398   | NaN       | 27940.635 |
| sp Q8NBJ5 GT251_HUMAN   | 8828.929   | NaN       | 12749.91  |
| sp Q9UBI1 COMD3_HUMAN   | 772.9703   | NaN       | 11755.596 |
| sp Q9H0A8 COMD4_HUMAN   | 441.89526  | NaN       | 3136.26   |
| sp Q7Z4G1 COMD6_HUMAN   | 0          | NaN       | 2395.0986 |
| sp Q9P000 COMD9_HUMAN   | 1168.821   | NaN       | 2219.986  |

|                       |           |           |            |
|-----------------------|-----------|-----------|------------|
| sp P49747 COMP_HUMAN  | 3220.8745 | 761.95886 | 16039.824  |
| sp P21964 COMT_HUMAN  | 15275.49  | NaN       | 5232.2837  |
| sp P53621 COPA_HUMAN  | 18772.684 | 459.8729  | 23686.098  |
| sp P53618 COPB_HUMAN  | 11046.631 | NaN       | 8348.088   |
| sp P35606 COPB2_HUMAN | 9013.126  | 527.004   | 6066.765   |
| sp O14579 COPE_HUMAN  | 4594.016  | NaN       | 3231.69    |
| sp Q9Y678 COPG1_HUMAN | 11398.083 | 284.2212  | 6102.3125  |
| sp Q9UBF2 COPG2_HUMAN | 2528.0852 | 614.7248  | 66109.49   |
| sp P61201 CSN2_HUMAN  | 3845.7202 | NaN       | 3192.6267  |
| sp Q9UNS2 CSN3_HUMAN  | 3230.9673 | 136.48111 | 3177.3682  |
| sp Q9BT78 CSN4_HUMAN  | 26675.62  | NaN       | 10963.064  |
| sp Q92905 CSN5_HUMAN  | 3554.1213 | NaN       | 5981.0254  |
| sp Q7L5N1 CSN6_HUMAN  | 3622.8435 | NaN       | 2946.2764  |
| sp Q9UBW8 CSN7A_HUMAN | 547.30396 | NaN       | 11088.441  |
| sp Q99627 CSN8_HUMAN  | 912.0425  | NaN       | 6360.0454  |
| sp P61923 COPZ1_HUMAN | 4237.451  | NaN       | 992.41846  |
| sp Q9BR76 COR1B_HUMAN | 5773.441  | NaN       | 1934.7463  |
| sp Q9ULV4 COR1C_HUMAN | 9788.679  | NaN       | 14080.8955 |
| sp Q14019 COTL1_HUMAN | 5420.085  | NaN       | 2576.3516  |
| sp Q5RI15 COX20_HUMAN | 1299.4204 | NaN       | 17535.916  |
| sp P13073 COX41_HUMAN | 6821.6636 | 452.3087  | 2148.1272  |
| sp P20674 COX5A_HUMAN | 4092.9756 | 1556.6497 | 1855.0089  |
| sp P10606 COX5B_HUMAN | 10501.79  | 2110.6907 | 21713.816  |
| sp P14854 CX6B1_HUMAN | 2573.3604 | NaN       | 72345.06   |
| sp P09669 COX6C_HUMAN | 722.7545  | NaN       | 5820.4688  |
| sp P24310 CX7A1_HUMAN | 261.77692 | NaN       | 6010.248   |
| sp P14406 CX7A2_HUMAN | 1911.2814 | NaN       | 23492.09   |
| sp O14548 COX7R_HUMAN | 727.12994 | NaN       | 6165.289   |
| sp P15954 COX7C_HUMAN | 319.42987 | NaN       | 3460.1924  |
| sp P10176 COX8A_HUMAN | 424.7851  | NaN       | 3740.383   |
| sp P00450 CERU_HUMAN  | 6989.617  | 1645.3976 | 7819.924   |
| sp O75976 CBPD_HUMAN  | 26128.166 | NaN       | 1030.2122  |
| sp P14384 CBPM_HUMAN  | 1658.516  | NaN       | 13554.38   |

|                       |           |           |           |
|-----------------------|-----------|-----------|-----------|
| sp P15169 CBPN_HUMAN  | 363.8977  | NaN       | 2266.9768 |
| sp Q99829 CPNE1_HUMAN | 7451.1655 | NaN       | 1855.9227 |
| sp Q96FN4 CPNE2_HUMAN | 513.3798  | 242.21753 | 5426.333  |
| sp O75131 CPNE3_HUMAN | 12412.06  | NaN       | 1709.3878 |
| sp Q9UBL6 CPNE7_HUMAN | 3335.6855 | NaN       | 7855.961  |
| sp P36551 HEM6_HUMAN  | 137.87886 | NaN       | 17081.324 |
| sp Q9BRF8 CPPED_HUMAN | 913.9199  | NaN       | 4659.4375 |
| sp Q16630 CPSF6_HUMAN | 147.80472 | NaN       | 34942.215 |
| sp Q8N684 CPSF7_HUMAN | 369.82812 | NaN       | 3147.1545 |
| sp P50416 CPT1A_HUMAN | 8666.599  | 199.8777  | 5502.727  |
| sp P43155 CACP_HUMAN  | 835.78503 | NaN       | 6271.474  |
| sp Q96HD1 CREL1_HUMAN | 409.36798 | NaN       | 9613.138  |
| sp Q6UXH1 CREL2_HUMAN | 1977.346  | NaN       | 5244.051  |
| sp Q9NZV1 CRIM1_HUMAN | 4398.504  | NaN       | 30745.963 |
| sp P46108 CRK_HUMAN   | 1648.6738 | NaN       | 38149.242 |
| sp P46109 CRKL_HUMAN  | 1450.0208 | NaN       | 124477.78 |
| sp Q9UKG9 OCTC_HUMAN  | 1118.7573 | NaN       | 4660.743  |
| sp O75718 CRTAP_HUMAN | 9971.833  | NaN       | 6940.2026 |
| sp P02511 CRYAB_HUMAN | 2039.3949 | NaN       | 1082.0845 |
| sp Q08257 QOR_HUMAN   | 3530.93   | NaN       | 2392.5615 |
| sp O75390 CISY_HUMAN  | 11856.574 | 321.10956 | 2738.3772 |
| sp O75534 CSDE1_HUMAN | 7485.175  | NaN       | 474.35248 |
| sp P55060 XPO2_HUMAN  | 7082.9316 | NaN       | 15941.406 |
| sp Q8TDX6 CGAT1_HUMAN | 2086.4243 | NaN       | 13606.98  |
| sp P41240 CSK_HUMAN   | 813.78467 | NaN       | 13017.834 |
| sp P48729 KC1A_HUMAN  | 2194.5054 | NaN       | 8065.438  |
| sp P48730 KC1D_HUMAN  | 383.32516 | NaN       | 4668.695  |
| sp P68400 CSK21_HUMAN | 7726.497  | NaN       | 1344.617  |
| sp P19784 CSK22_HUMAN | 5804.792  | NaN       | 6132.719  |
| sp P67870 CSK2B_HUMAN | 5809.1445 | NaN       | 1701.7769 |
| sp Q6UVK1 CSPG4_HUMAN | 9460.806  | NaN       | 8227.359  |
| sp P21291 CSRP1_HUMAN | 11294.082 | 258.0214  | 11913.664 |
| sp Q16527 CSRP2_HUMAN | 466.22696 | NaN       | 7288.0347 |

|                       |            |           |           |
|-----------------------|------------|-----------|-----------|
| sp P04080 CYTB_HUMAN  | 8828.159   | 769.0468  | 5394.963  |
| sp Q13363 CTBP1_HUMAN | 2023.081   | NaN       | 1635.9789 |
| sp P56545 CTBP2_HUMAN | 211.6437   | NaN       | 13101.076 |
| sp O15194 CTDSL_HUMAN | 213.3219   | NaN       | 6565.6777 |
| sp Q96CG8 CTHR1_HUMAN | 4745.211   | 731.1213  | 3812.9243 |
| sp O43310 CTIF_HUMAN  | 302.38913  | NaN       | 2878.4702 |
| sp P35221 CTNA1_HUMAN | 11345.8545 | 625.5239  | 1327.8271 |
| sp P35222 CTNB1_HUMAN | 8215.919   | 436.47815 | 5536.1113 |
| sp O60716 CTND1_HUMAN | 7702.34    | NaN       | 5049.2407 |
| sp P17812 PYRG1_HUMAN | 5539.004   | NaN       | 2953.4448 |
| sp P10619 PPGB_HUMAN  | 4964.0874  | 892.7404  | 26884.943 |
| sp P07858 CATB_HUMAN  | 10262.099  | 4163.2754 | 7816.374  |
| sp P53634 CATC_HUMAN  | 454.62244  | NaN       | 7972.073  |
| sp P07339 CATD_HUMAN  | 15083.989  | 3667.9692 | 32969.5   |
| sp P43235 CATK_HUMAN  | 5150.728   | 692.72076 | 11427.076 |
| sp P07711 CATL1_HUMAN | 2240.63    | NaN       | 4763.079  |
| sp P25774 CATS_HUMAN  | NaN        | 190.81592 | 8187.447  |
| sp Q9UBR2 CATZ_HUMAN  | 2737.3958  | 385.60852 | 14458.774 |
| sp Q14247 SRC8_HUMAN  | 9046.548   | NaN       | 17591.387 |
| sp Q13616 CUL1_HUMAN  | 1679.4539  | NaN       | 1291.6803 |
| sp Q13617 CUL2_HUMAN  | 783.2515   | NaN       | 1223.331  |
| sp Q13618 CUL3_HUMAN  | 665.7038   | NaN       | 11874.02  |
| sp Q13619 CUL4A_HUMAN | 1901.6157  | NaN       | 605.95215 |
| sp Q13620 CUL4B_HUMAN | 2661.445   | NaN       | 2300.2424 |
| sp Q93034 CUL5_HUMAN  | 1705.5869  | NaN       | 46269.46  |
| sp Q14999 CUL7_HUMAN  | 770.2501   | NaN       | 2323.6604 |
| sp O60888 CUTA_HUMAN  | 2384.352   | 657.2885  | 6824.295  |
| sp P48061 SDF1_HUMAN  | 665.976    | NaN       | 1002.4628 |
| sp O14569 C56D2_HUMAN | 293.43423  | NaN       | 425.9376  |
| sp P00167 CYB5_HUMAN  | 5698.114   | NaN       | 8599.885  |
| sp O43169 CYB5B_HUMAN | 11618.357  | 2215.848  | 10077.266 |
| sp Q9UHQ9 NB5R1_HUMAN | 2968.2932  | NaN       | 2422.0872 |
| sp P00387 NB5R3_HUMAN | 30975.41   | 4209.651  | 696.7848  |

|                       |           |           |           |
|-----------------------|-----------|-----------|-----------|
| sp Q9BQA9 CYBC1_HUMAN | 1473.635  | NaN       | 2440.0085 |
| sp Q53TN4 CYBR1_HUMAN | 20362.492 | NaN       | 17310.934 |
| sp P08574 CY1_HUMAN   | 2568.2627 | NaN       | 9059.343  |
| sp P99999 CYC_HUMAN   | 1058.3708 | NaN       | 2908.9082 |
| sp Q7L576 CYFP1_HUMAN | 16206.73  | NaN       | 4168.5796 |
| sp Q8WWM9 CYGB_HUMAN  | 517.8949  | NaN       | 1883.4929 |
| sp Q16678 CP1B1_HUMAN | 3525.3958 | NaN       | 17194.25  |
| sp Q6UW02 CP20A_HUMAN | 2584.3506 | NaN       | 4793.5913 |
| sp Q16850 CP51A_HUMAN | 6686.498  | NaN       | 15813.6   |
| sp Q9H0Q0 CYRIA_HUMAN | 442.91724 | NaN       | 9788.588  |
| sp Q9NUQ9 CYRIB_HUMAN | 1891.1189 | NaN       | 4036.5127 |
| sp Q9H1C7 CYTM1_HUMAN | 787.8904  | NaN       | 16024.566 |
| sp Q9NWV4 CZIB_HUMAN  | 569.7238  | NaN       | 9073.459  |
| sp P98082 DAB2_HUMAN  | 1763.031  | NaN       | 18699.44  |
| sp P61803 DAD1_HUMAN  | 12907.39  | 1452.7041 | 5068.6123 |
| sp Q14118 DAG1_HUMAN  | 4975.957  | NaN       | 4897.889  |
| sp Q8NCG7 DGLB_HUMAN  | 1834.529  | NaN       | 11096.9   |
| sp P51398 RT29_HUMAN  | 1401.1305 | NaN       | 8120.5186 |
| sp O43293 DAPK3_HUMAN | 1030.5289 | NaN       | 1681.585  |
| sp P14868 SYDC_HUMAN  | 8622.263  | 510.85373 | 3855.2485 |
| sp Q6PI48 SYDM_HUMAN  | 462.99234 | NaN       | 1702.8223 |
| sp Q96EP5 DAZP1_HUMAN | 1308.2299 | NaN       | 19364.34  |
| sp P07108 ACBP_HUMAN  | 7087.2646 | NaN       | 12288.511 |
| sp Q16643 DREB_HUMAN  | 5626.966  | NaN       | 3881.4785 |
| sp Q9UJU6 DBNL_HUMAN  | 7867.24   | NaN       | 14742.968 |
| sp P11182 ODB2_HUMAN  | 1975.6038 | NaN       | 4425.702  |
| sp Q6ZNG2 DBX2_HUMAN  | NaN       | 80.26558  | 7257.059  |
| sp P61962 DCAF7_HUMAN | 1744.5272 | NaN       | 10366.086 |
| sp Q96PD2 DCBD2_HUMAN | 1190.7748 | NaN       | 3721.5322 |
| sp P81605 DCD_HUMAN   | NaN       | 0         | 9535.72   |
| sp P27707 DCK_HUMAN   | 1069.8582 | NaN       | 1154.5889 |
| sp P07585 PGS2_HUMAN  | 1602.6492 | NaN       | 3936.7925 |
| sp P32321 DCTD_HUMAN  | 602.10504 | NaN       | 8302.548  |



|                       |            |           |           |
|-----------------------|------------|-----------|-----------|
| sp Q14203 DCTN1_HUMAN | 5996.2314  | NaN       | 6323.2837 |
| sp Q13561 DCTN2_HUMAN | 8724.616   | 268.47922 | 6464.5293 |
| sp O75935 DCTN3_HUMAN | 950.6952   | NaN       | 15469.277 |
| sp Q9UJW0 DCTN4_HUMAN | 29454.467  | NaN       | 8613.485  |
| sp O00399 DCTN6_HUMAN | 1458.1357  | NaN       | 277.26498 |
| sp Q8IWE4 DCNL3_HUMAN | 460.37466  | NaN       | 18961.152 |
| sp Q7Z4W1 DCXR_HUMAN  | 1472.3967  | NaN       | 8249.71   |
| sp O94760 DDAH1_HUMAN | 1025.5306  | NaN       | 16913.498 |
| sp O95865 DDAH2_HUMAN | 2716.0588  | NaN       | 17228.736 |
| sp Q16531 DDB1_HUMAN  | 8406.617   | NaN       | 7821.763  |
| sp P39656 OST48_HUMAN | 21444.143  | 1437.7257 | 36854.438 |
| sp Q16832 DDR2_HUMAN  | 74557.37   | NaN       | 2226.9915 |
| sp Q96HY6 DDRGK_HUMAN | 923.9595   | NaN       | 5524.8057 |
| sp P30046 DOPD_HUMAN  | 1956.6932  | NaN       | 225.73972 |
| sp Q92499 DDX1_HUMAN  | 7900.2637  | NaN       | 1082.3386 |
| sp Q92841 DDX17_HUMAN | 5256.5723  | NaN       | 2370.471  |
| sp Q9NUU7 DD19A_HUMAN | 10655.69   | NaN       | 7338.222  |
| sp O00148 DX39A_HUMAN | 17364.922  | NaN       | 6229.0137 |
| sp Q13838 DX39B_HUMAN | 2394.0908  | NaN       | 10884.142 |
| sp O00571 DDX3X_HUMAN | 9888.548   | 273.5707  | 17405.129 |
| sp Q7L014 DDX46_HUMAN | 397.813    | NaN       | 7627.6167 |
| sp Q9Y6V7 DDX49_HUMAN | 718.45026  | NaN       | 1996.3433 |
| sp P17844 DDX5_HUMAN  | 5501.455   | NaN       | 5616.12   |
| sp P26196 DDX6_HUMAN  | 4439.4106  | NaN       | 4028.419  |
| sp Q16698 DECR_HUMAN  | 7412.8203  | 527.4026  | 6765.0605 |
| sp O15121 DEGS1_HUMAN | 3993.589   | NaN       | 3672.4722 |
| sp P35659 DEK_HUMAN   | 10826.5625 | NaN       | 1889.2722 |
| sp Q8TCE6 DEN10_HUMAN | 278.0211   | NaN       | 3051.7231 |
| sp O43583 DENR_HUMAN  | 872.1824   | NaN       | 21798.285 |
| sp Q9Y315 DEOC_HUMAN  | 2668.6326  | NaN       | 4312.9854 |
| sp Q9BUN8 DERL1_HUMAN | 2325.8914  | NaN       | 1799.8425 |
| sp Q9GZP9 DERL2_HUMAN | 125.2823   | NaN       | 31221.734 |
| sp Q15392 DHC24_HUMAN | 4827.5376  | NaN       | 13128.355 |

|                       |           |           |           |
|-----------------------|-----------|-----------|-----------|
| sp Q9UBM7 DHCR7_HUMAN | 4034.136  | NaN       | 12369.842 |
| sp P00374 DYR_HUMAN   | 596.5242  | NaN       | 5067.106  |
| sp Q96LJ7 DHRS1_HUMAN | 438.79477 | NaN       | 7553.2607 |
| sp O75911 DHRS3_HUMAN | 872.47266 | NaN       | 15439.744 |
| sp Q9BTZ2 DHRS4_HUMAN | 130.47627 | NaN       | 5244.0767 |
| sp Q9Y394 DHRS7_HUMAN | 5830.973  | NaN       | 5519.257  |
| sp O43143 DHX15_HUMAN | 5498.26   | NaN       | 8566.947  |
| sp Q7L2E3 DHX30_HUMAN | 617.91187 | NaN       | 4269.3438 |
| sp Q08211 DHX9_HUMAN  | 5997.112  | NaN       | 11089.626 |
| sp O60610 DIAP1_HUMAN | 1624.0414 | NaN       | 60326.24  |
| sp Q9P265 DIP2B_HUMAN | 3361.026  | NaN       | 10104.019 |
| sp Q5T7M9 DIK1A_HUMAN | 1220.4747 | NaN       | 1357.8153 |
| sp O60832 DKC1_HUMAN  | 184.22517 | NaN       | 6528.9404 |
| sp Q9UBP4 DKK3_HUMAN  | 4113.9395 | NaN       | 5101.1416 |
| sp P10515 ODP2_HUMAN  | 12603.709 | 0         | 5471.1416 |
| sp P09622 DLDH_HUMAN  | 11154.341 | 1435.065  | 15939.068 |
| sp Q12959 DLG1_HUMAN  | 1594.9077 | NaN       | 7448.6313 |
| sp P36957 ODO2_HUMAN  | 13287.49  | 2691.1416 | 7479.9995 |
| sp Q9UGM3 DMBT1_HUMAN | 301.9393  | NaN       | 10030.77  |
| sp Q86Y56 DAAF5_HUMAN | 129.5111  | NaN       | 3297.4097 |
| sp P31689 DNJA1_HUMAN | 11063.924 | NaN       | 3654.9592 |
| sp O60884 DNJA2_HUMAN | 7685.322  | NaN       | 5235.979  |
| sp Q96EY1 DNJA3_HUMAN | 882.3297  | NaN       | 8197.386  |
| sp P25685 DNJB1_HUMAN | 27945.176 | NaN       | 10495.757 |
| sp Q9UBS4 DJB11_HUMAN | 9045.883  | 277.84842 | 9786.969  |
| sp Q9NXW2 DJB12_HUMAN | 2149.5657 | NaN       | 6970.966  |
| sp Q9UDY4 DNJB4_HUMAN | 1110.9924 | NaN       | 8833.843  |
| sp O75190 DNJB6_HUMAN | 6377.665  | NaN       | 6209.547  |
| sp Q96KC8 DNJC1_HUMAN | 585.01105 | NaN       | 9898.359  |
| sp Q8IXB1 DJC10_HUMAN | 9294.638  | NaN       | 3188.4023 |
| sp Q9NVH1 DJC11_HUMAN | 139.40376 | 177.3374  | 9459.522  |
| sp O75165 DJC13_HUMAN | 4593.143  | NaN       | 4119.961  |
| sp Q13217 DNJC3_HUMAN | 6388.4146 | 494.4311  | 7441.753  |

|                       |            |           |           |
|-----------------------|------------|-----------|-----------|
| sp Q9H3Z4 DNJC5_HUMAN | 2526.5156  | 179.43863 | 7031.286  |
| sp Q99615 DNJC7_HUMAN | 2073.7612  | NaN       | 16929.98  |
| sp P49184 DNSL1_HUMAN | 1273.5786  | NaN       | 8454.051  |
| sp O00115 DNS2A_HUMAN | 761.26404  | 295.25748 | 868.00714 |
| sp O00429 DNM1L_HUMAN | 5010.0146  | NaN       | 37661.21  |
| sp P50570 DYN2_HUMAN  | 5789.365   | NaN       | 4459.5493 |
| sp Q9ULA0 DNPEP_HUMAN | 698.4054   | NaN       | 2477.662  |
| sp O43598 DNPH1_HUMAN | 453.11057  | NaN       | 3188.646  |
| sp Q14185 DOCK1_HUMAN | 484.95154  | NaN       | 688.0408  |
| sp Q96BY6 DOC10_HUMAN | 1089.6976  | NaN       | 27614.71  |
| sp Q5JSL3 DOC11_HUMAN | 501.714    | NaN       | 4874.3696 |
| sp Q96N67 DOCK7_HUMAN | 14619.397  | NaN       | 3788.4097 |
| sp Q9BU89 DOHH_HUMAN  | 194.87297  | NaN       | 6983.167  |
| sp Q9UPQ8 DOLK_HUMAN  | 937.6277   | NaN       | 595.6369  |
| sp Q9H3H5 GPT_HUMAN   | 325.38885  | NaN       | 14201.539 |
| sp O60762 DPM1_HUMAN  | 2015.2528  | NaN       | 4961.4414 |
| sp Q9P2X0 DPM3_HUMAN  | 1528.4225  | 296.6932  | 2933.6096 |
| sp Q9NY33 DPP3_HUMAN  | 3676.3079  | NaN       | 12659.17  |
| sp P27487 DPP4_HUMAN  | 13115.296  | NaN       | 5246.778  |
| sp Q9UHL4 DPP2_HUMAN  | 1552.1812  | NaN       | 4297.7295 |
| sp Q2PZ11 D19L1_HUMAN | 2485.6208  | NaN       | 34336.25  |
| sp Q9C005 DPY30_HUMAN | 125.665016 | NaN       | 19464.234 |
| sp Q16555 DPYL2_HUMAN | 10681.552  | 278.0461  | 271.76016 |
| sp Q14195 DPYL3_HUMAN | 8542.778   | NaN       | 7973.0884 |
| sp Q9Y295 DRG1_HUMAN  | 1408.128   | NaN       | 1665.6213 |
| sp P55039 DRG2_HUMAN  | 1733.0979  | NaN       | 5427.0044 |
| sp Q8IZU8 DSEL_HUMAN  | 798.77594  | NaN       | 24175.752 |
| sp P60981 DEST_HUMAN  | 15418.783  | 2082.9165 | 10194.496 |
| sp Q8TEA8 DTD1_HUMAN  | 444.82367  | NaN       | 4760.8623 |
| sp Q8TDB6 DTX3L_HUMAN | 479.5019   | 220.16243 | 6274.4937 |
| sp P23919 KTHY_HUMAN  | 6762.132   | NaN       | 4721.699  |
| sp P51452 DUS3_HUMAN  | 797.5442   | NaN       | 8222.086  |
| sp P33316 DUT_HUMAN   | 5691.1167  | NaN       | 3630.605  |

|                       |            |            |           |
|-----------------------|------------|------------|-----------|
| sp Q14204 DYHC1_HUMAN | 9572.928   | 1543.4951  | 4860.5435 |
| sp Q13409 DC1I2_HUMAN | 8040.2715  | NaN        | 396.56445 |
| sp Q9Y6G9 DC1L1_HUMAN | 6784.61    | NaN        | 7452.2188 |
| sp O43237 DC1L2_HUMAN | 4701.453   | NaN        | 15081.137 |
| sp P63167 DYL1_HUMAN  | 8107.3086  | NaN        | 7231.935  |
| sp Q96FJ2 DYL2_HUMAN  | 251.78778  | NaN        | 3822.1863 |
| sp Q9NP97 DLRB1_HUMAN | 3999.3735  | NaN        | 12694.633 |
| sp P63172 DYLT1_HUMAN | 1961.7749  | NaN        | 2686.729  |
| sp P51808 DYLT3_HUMAN | 2824.686   | NaN        | 11229.531 |
| sp Q15125 EBP_HUMAN   | 6346.331   | NaN        | 1805.3757 |
| sp P42892 ECE1_HUMAN  | 9414.065   | NaN        | 6434.866  |
| sp Q13011 ECH1_HUMAN  | 7873.839   | 1011.05896 | 7037.6587 |
| sp Q9NTX5 ECHD1_HUMAN | 845.1922   | NaN        | 5701.2773 |
| sp P30084 ECHM_HUMAN  | 9259.591   | 488.98584  | 2692.8755 |
| sp P42126 ECI1_HUMAN  | 2764.5015  | NaN        | 1189.9235 |
| sp O75521 ECI2_HUMAN  | 4594.0273  | NaN        | 17756.059 |
| sp Q5VYK3 ECM29_HUMAN | 3758.2354  | NaN        | 12654.769 |
| sp Q6P2E9 EDC4_HUMAN  | 3110.5771  | NaN        | 4477.5186 |
| sp O43854 EDIL3_HUMAN | 11608.572  | 1067.5801  | 7318.9487 |
| sp P24530 EDNRB_HUMAN | 3118.739   | NaN        | 5000.7007 |
| sp Q15075 EEA1_HUMAN  | 2959.8298  | NaN        | 3584.2258 |
| sp P68104 EF1A1_HUMAN | 100523.89  | 11443.602  | 13375.958 |
| sp P24534 EF1B_HUMAN  | 6645.619   | 1443.6306  | 3261.0112 |
| sp P29692 EF1D_HUMAN  | 14114.737  | 951.51184  | 2700.4695 |
| sp O43324 MCA3_HUMAN  | 3084.4314  | NaN        | 4473.9854 |
| sp P26641 EF1G_HUMAN  | 10259.752  | 1760.4423  | 6338.9863 |
| sp P13639 EF2_HUMAN   | 26316.008  | 4118.788   | 4512.7773 |
| sp Q12805 FBLN3_HUMAN | 1747.4839  | 190.7975   | 937.3638  |
| sp Q96C19 EFHD2_HUMAN | 617.6287   | NaN        | 8996.07   |
| sp Q7Z2Z2 EFL1_HUMAN  | 1016.39374 | NaN        | 6171.8345 |
| sp Q14156 EFR3A_HUMAN | 0          | NaN        | 302.35535 |
| sp Q15029 U5S1_HUMAN  | 5441.8467  | 396.82925  | 5874.221  |
| sp P00533 EGFR_HUMAN  | 9564.793   | NaN        | 22093.934 |

|                       |           |           |           |
|-----------------------|-----------|-----------|-----------|
| sp Q8N3D4 EH1L1_HUMAN | 4740.1943 | NaN       | 4419.834  |
| sp Q9H4M9 EHD1_HUMAN  | 6253.011  | NaN       | 6892.117  |
| sp Q9NZN4 EHD2_HUMAN  | 12925.37  | NaN       | 26941.312 |
| sp Q9NZN3 EHD3_HUMAN  | 14087.457 | NaN       | 10973.343 |
| sp Q9H223 EHD4_HUMAN  | 18266.725 | NaN       | 60196.035 |
| sp Q08426 ECHP_HUMAN  | 134.55772 | NaN       | 5175.202  |
| sp P41567 EIF1_HUMAN  | 4398.351  | NaN       | 6362.336  |
| sp P47813 IF1AX_HUMAN | 2402.1548 | NaN       | 14122.584 |
| sp Q9BY44 EIF2A_HUMAN | 523.52686 | NaN       | 15132.401 |
| sp P19525 E2AK2_HUMAN | 1712.212  | NaN       | 3849.531  |
| sp Q14232 EI2BA_HUMAN | 1606.5178 | NaN       | 1744.3479 |
| sp P49770 EI2BB_HUMAN | 822.96906 | NaN       | 10451.974 |
| sp Q9NR50 EI2BG_HUMAN | 303.80112 | NaN       | 23133.473 |
| sp Q9UI10 EI2BD_HUMAN | 894.67914 | NaN       | 4717.4653 |
| sp Q13144 EI2BE_HUMAN | 3316.977  | NaN       | 4924.0957 |
| sp P05198 IF2A_HUMAN  | 4081.6362 | 522.27185 | 7002.8843 |
| sp P20042 IF2B_HUMAN  | 5403.6064 | NaN       | 2043.6481 |
| sp P41091 IF2G_HUMAN  | 4391.8745 | NaN       | 1069.2903 |
| sp Q14152 EIF3A_HUMAN | 10255.929 | NaN       | 1759.9996 |
| sp P55884 EIF3B_HUMAN | 7428.6484 | NaN       | 5480.2285 |
| sp B5ME19 EIFCL_HUMAN | 8628.9    | NaN       | 3909.3293 |
| sp O15371 EIF3D_HUMAN | 6042.9053 | NaN       | 15914.748 |
| sp P60228 EIF3E_HUMAN | 6059.4688 | 221.3179  | 1952.9595 |
| sp O00303 EIF3F_HUMAN | 4287.236  | NaN       | 1792.0636 |
| sp O75821 EIF3G_HUMAN | 331.94757 | NaN       | 16170.798 |
| sp O15372 EIF3H_HUMAN | 3485.2292 | NaN       | 16180.734 |
| sp Q13347 EIF3I_HUMAN | 5672.192  | NaN       | 8412.519  |
| sp O75822 EIF3J_HUMAN | 845.009   | NaN       | 7378.8564 |
| sp Q9UBQ5 EIF3K_HUMAN | 5411.4263 | NaN       | 8361.96   |
| sp Q9Y262 EIF3L_HUMAN | 6768.953  | NaN       | 31649.377 |
| sp Q7L2H7 EIF3M_HUMAN | 5690.544  | NaN       | 1498.0947 |
| sp P60842 IF4A1_HUMAN | 21272.678 | 2642.248  | 5723.67   |
| sp Q14240 IF4A2_HUMAN | 1887.4037 | NaN       | 17584.814 |

|                       |           |           |           |
|-----------------------|-----------|-----------|-----------|
| sp P38919 IF4A3_HUMAN | 3287.7993 | NaN       | 1046.9407 |
| sp P23588 IF4B_HUMAN  | 255.54417 | NaN       | 3452.3591 |
| sp P06730 IF4E_HUMAN  | 2542.18   | NaN       | 5109.645  |
| sp O60573 IF4E2_HUMAN | 432.18332 | NaN       | 6961.6406 |
| sp Q13541 4EBP1_HUMAN | 496.75043 | NaN       | 13580.942 |
| sp Q04637 IF4G1_HUMAN | 9027.318  | NaN       | 12866.438 |
| sp P78344 IF4G2_HUMAN | 6460.6562 | NaN       | 9095.458  |
| sp Q15056 IF4H_HUMAN  | 2008.7374 | NaN       | 3001.4744 |
| sp P55010 IF5_HUMAN   | 3569.3833 | NaN       | 2674.1592 |
| sp P63241 IF5A1_HUMAN | 9698.543  | 254.01619 | 16746.463 |
| sp O60841 IF2P_HUMAN  | 1699.4877 | NaN       | 1164.9897 |
| sp P56537 IF6_HUMAN   | 1393.3267 | NaN       | 42030.566 |
| sp Q15717 ELAV1_HUMAN | 4558.885  | NaN       | 1735.0173 |
| sp Q96JJ3 ELMO2_HUMAN | 1198.8475 | NaN       | 5116.921  |
| sp Q8IZ81 ELMD2_HUMAN | 0         | NaN       | 4438.4785 |
| sp Q15370 ELOB_HUMAN  | 2751.3547 | NaN       | 5263.6377 |
| sp Q15369 ELOC_HUMAN  | 5979.5625 | NaN       | 8548.18   |
| sp Q9BW60 ELOV1_HUMAN | 3109.4087 | NaN       | 11672.668 |
| sp Q9NYP7 ELOV5_HUMAN | 1556.2778 | NaN       | 6547.119  |
| sp O95163 ELP1_HUMAN  | 2784.5974 | NaN       | 8273.105  |
| sp Q8N766 EMC1_HUMAN  | 5552.1074 | NaN       | 6746.8843 |
| sp Q5UCC4 EMC10_HUMAN | 633.9111  | NaN       | 15787.838 |
| sp Q15006 EMC2_HUMAN  | 3355.4846 | NaN       | 64294.99  |
| sp Q9P0I2 EMC3_HUMAN  | 2431.1099 | NaN       | 13814.033 |
| sp Q5J8M3 EMC4_HUMAN  | 2864.0288 | NaN       | 12096.665 |
| sp Q9NPA0 EMC7_HUMAN  | 15283.232 | NaN       | 5929.9775 |
| sp O43402 EMC8_HUMAN  | 1228.9844 | NaN       | 10822.849 |
| sp P50402 EMD_HUMAN   | 2878.8994 | NaN       | 12296.848 |
| sp Q9Y6C2 EMIL1_HUMAN | 955.55444 | NaN       | 10287.898 |
| sp O95834 EMAL2_HUMAN | 1010.5451 | NaN       | 478.4813  |
| sp Q9HC35 EMAL4_HUMAN | 868.37366 | NaN       | 1171.083  |
| sp P54852 EMP3_HUMAN  | 6190.515  | NaN       | 15291.609 |
| sp Q8N8S7 ENAH_HUMAN  | 271.42996 | NaN       | 10360.244 |

|                       |           |           |           |
|-----------------------|-----------|-----------|-----------|
| sp O94919 ENDD1_HUMAN | 4095.8335 | NaN       | 1089.0981 |
| sp P17813 EGLN_HUMAN  | 6885.825  | NaN       | 5602.5854 |
| sp P06733 ENOA_HUMAN  | 44003.65  | 10208.649 | 17598.084 |
| sp P09104 ENOG_HUMAN  | 2601.4917 | NaN       | 313.91827 |
| sp P13929 ENOB_HUMAN  | 32713.139 | 3741.8164 | 3490.427  |
| sp P49961 ENTP1_HUMAN | 3229.274  | NaN       | 71729.22  |
| sp Q5NDL2 EOGT_HUMAN  | 1538.8706 | NaN       | 66421.44  |
| sp Q9H4G0 E41L1_HUMAN | 827.59106 | NaN       | 3493.1309 |
| sp O43491 E41L2_HUMAN | 5379.14   | NaN       | 11682.133 |
| sp Q9Y2J2 E41L3_HUMAN | 5963.6626 | NaN       | 1879.6432 |
| sp Q9UM22 EPDR1_HUMAN | 3976.5295 | 347.50494 | 8312.414  |
| sp P29317 EPHA2_HUMAN | 5996.6895 | NaN       | 11384.939 |
| sp P54764 EPHA4_HUMAN | 3421.2522 | NaN       | 1640.9824 |
| sp P29323 EPHB2_HUMAN | 4134.803  | NaN       | 5714.95   |
| sp P54760 EPHB4_HUMAN | 1625.5441 | NaN       | 621.4536  |
| sp P07099 HYEP_HUMAN  | 15854.842 | 713.6244  | 5601.817  |
| sp P07814 SYEP_HUMAN  | 8610.454  | NaN       | 6399.7324 |
| sp P42566 EPS15_HUMAN | 264.25443 | NaN       | 9220.426  |
| sp Q9NZ08 ERAP1_HUMAN | 7099.735  | NaN       | 3390.8208 |
| sp Q96RT1 ERBIN_HUMAN | 2199.0398 | NaN       | 550.88385 |
| sp Q9UKR5 ERG28_HUMAN | 725.5757  | NaN       | 5633.489  |
| sp Q969X5 ERGI1_HUMAN | 8471.334  | NaN       | 2918.143  |
| sp Q96RQ1 ERGI2_HUMAN | 4156.654  | NaN       | 11376.24  |
| sp Q9Y282 ERGI3_HUMAN | 2361.9358 | NaN       | 23277.525 |
| sp P84090 ERH_HUMAN   | 540.58374 | NaN       | 6819.341  |
| sp Q96DZ1 ERLEC_HUMAN | 2090.6255 | NaN       | 18676.55  |
| sp O75477 ERLN1_HUMAN | 12342.689 | 1325.5078 | 3910.611  |
| sp O94905 ERLN2_HUMAN | 8857.237  | 489.60123 | 6159.4604 |
| sp Q7Z2K6 ERMP1_HUMAN | 770.6286  | NaN       | 14690.517 |
| sp Q96HE7 ERO1A_HUMAN | 7742.084  | 818.8362  | 20605.5   |
| sp P30040 ERP29_HUMAN | 14859.798 | 3025.083  | 3640.4917 |
| sp Q9BS26 ERP44_HUMAN | 11895.895 | 1005.7763 | 838.5655  |
| sp P10768 ESTD_HUMAN  | 7896.743  | 311.3629  | 4133.008  |

|                       |           |            |           |
|-----------------------|-----------|------------|-----------|
| sp Q9BSJ8 ESYT1_HUMAN | 30670.484 | 1002.24585 | 25085.084 |
| sp A0FGR8 ESYT2_HUMAN | 5759.809  | NaN        | 20861.023 |
| sp P62495 ERF1_HUMAN  | 6264.556  | NaN        | 5142.916  |
| sp P13804 ETFA_HUMAN  | 5538.3105 | 933.25195  | 11133.555 |
| sp P38117 ETFB_HUMAN  | 9244.969  | 1010.869   | 2997.289  |
| sp Q16134 ETFD_HUMAN  | 1341.1995 | NaN        | 2222.546  |
| sp O95571 ETHE1_HUMAN | 4036.1758 | 632.389    | 17395.303 |
| sp Q9NVM1 EVA1B_HUMAN | 1170.4521 | NaN        | 1152.5132 |
| sp P57679 EVC_HUMAN   | NaN       | 169.10039  | 1911.5312 |
| sp Q01844 EWS_HUMAN   | 918.6147  | NaN        | 2811.3691 |
| sp Q9NVH0 EXD2_HUMAN  | 520.5794  | NaN        | 15233.781 |
| sp Q9NV70 EXOC1_HUMAN | 2504.4158 | NaN        | 13570.908 |
| sp Q96KP1 EXOC2_HUMAN | 2251.5024 | NaN        | 6602.1357 |
| sp O60645 EXOC3_HUMAN | 4333.4893 | NaN        | 10391.311 |
| sp Q96A65 EXOC4_HUMAN | 3467.9866 | NaN        | 1950.8916 |
| sp O00471 EXOC5_HUMAN | 3654.3396 | NaN        | 6247.345  |
| sp Q9Y2D4 EXC6B_HUMAN | 3700.2217 | NaN        | 7103.1523 |
| sp Q9UPT5 EXOC7_HUMAN | 2791.823  | NaN        | 209.33618 |
| sp Q8IYI6 EXOC8_HUMAN | 3193.5974 | NaN        | 3740.9226 |
| sp Q9Y2C4 EXOG_HUMAN  | 190.06174 | NaN        | 1130.31   |
| sp Q9UBQ6 EXTL2_HUMAN | 786.71875 | NaN        | 7429.9136 |
| sp P15311 EZRI_HUMAN  | 16290.233 | NaN        | 3682.4062 |
| sp P00742 FA10_HUMAN  | 15802.158 | NaN        | 1473.9755 |
| sp P03951 FA11_HUMAN  | 457.5829  | 205.55586  | 18548.928 |
| sp P00734 THRB_HUMAN  | 17235.213 | 4199.3667  | 2705.7686 |
| sp P25116 PAR1_HUMAN  | 2891.763  | NaN        | 3370.7817 |
| sp P12259 FA5_HUMAN   | 21910.77  | 3347.225   | 2903.336  |
| sp P00740 FA9_HUMAN   | 911.1716  | 422.35895  | 5775.127  |
| sp Q01469 FABP5_HUMAN | 5512.1104 | NaN        | 5392.8506 |
| sp O60427 FADS1_HUMAN | 667.9792  | NaN        | 3008.7407 |
| sp O95864 FADS2_HUMAN | 2402.2046 | NaN        | 12839.452 |
| sp Q96CS3 FAF2_HUMAN  | 9805.926  | NaN        | 3413.6519 |
| sp P16930 FAAA_HUMAN  | 22.34328  | NaN        | 87.7669   |



|                       |           |           |           |
|-----------------------|-----------|-----------|-----------|
| sp Q6P587 FAHD1_HUMAN | 2432.445  | 388.44452 | 4813.0815 |
| sp Q96GK7 FAH2A_HUMAN | 3112.5234 | NaN       | 10883.201 |
| sp Q8IWE2 NXP20_HUMAN | 3882.1838 | 230.92494 | 13179.98  |
| sp Q9NZB2 F120A_HUMAN | 5612.0327 | NaN       | 4636.45   |
| sp Q9BYI3 HYCCI_HUMAN | 181.1634  | NaN       | 3039.0981 |
| sp O75063 XYLK_HUMAN  | 827.7604  | NaN       | 3399.1682 |
| sp Q8IXL6 FA20C_HUMAN | 671.5526  | NaN       | 1670.2434 |
| sp Q96KR6 F210B_HUMAN | 186.71716 | NaN       | 16933.412 |
| sp Q9H0X4 F234A_HUMAN | 2523.043  | NaN       | 5689.196  |
| sp Q92520 FAM3C_HUMAN | 9443.291  | NaN       | 10271.313 |
| sp Q8NCA5 FA98A_HUMAN | 4018.9822 | NaN       | 7655.4307 |
| sp Q52LJ0 FA98B_HUMAN | 820.26483 | NaN       | 1687.3243 |
| sp Q12884 SEPR_HUMAN  | 11562.631 | 10409.589 | 14770.315 |
| sp Q9Y4F1 FARP1_HUMAN | 4284.1543 | NaN       | 5977.3716 |
| sp Q9Y285 SYFA_HUMAN  | 3719.6843 | NaN       | 21281.404 |
| sp Q9NSD9 SYFB_HUMAN  | 3652.8784 | NaN       | 6261.8467 |
| sp P25445 TNR6_HUMAN  | 2766.3115 | NaN       | 2357.0488 |
| sp P49327 FAS_HUMAN   | 14407.612 | NaN       | 2015.2607 |
| sp Q14517 FAT1_HUMAN  | 5574.418  | NaN       | 29833.486 |
| sp P62861 RS30_HUMAN  | 199.07513 | NaN       | 38750.7   |
| sp P22087 FBRL_HUMAN  | 3211.6433 | NaN       | 15734.317 |
| sp Q8WUP2 FBLI1_HUMAN | 615.40985 | NaN       | 1644.4501 |
| sp P23142 FBLN1_HUMAN | 5601.1714 | NaN       | 2952.916  |
| sp P35555 FBN1_HUMAN  | 4385.0366 | NaN       | 660.2186  |
| sp Q9UKC9 FBXL2_HUMAN | 1730.7092 | NaN       | 1890.1223 |
| sp P55899 FCGRN_HUMAN | 1914.9946 | NaN       | 2459.7197 |
| sp P37268 FDFT_HUMAN  | 13930.178 | NaN       | 25195.428 |
| sp P14324 FPPS_HUMAN  | 4045.298  | NaN       | 4634.6865 |
| sp P10109 ADX_HUMAN   | 1344.5153 | NaN       | 33796.53  |
| sp P22570 ADRO_HUMAN  | 1029.0614 | NaN       | 29168.408 |
| sp P22830 HEMH_HUMAN  | 469.09622 | NaN       | 2660.746  |
| sp P39748 FEN1_HUMAN  | 2414.725  | NaN       | 17113.2   |
| sp Q96AC1 FERM2_HUMAN | 5399.979  | NaN       | 3119.9097 |

|                       |           |           |           |
|-----------------------|-----------|-----------|-----------|
| sp P02671 FIBA_HUMAN  | 647.5229  | NaN       | 4456.307  |
| sp P02675 FIBB_HUMAN  | 191.67221 | NaN       | 4114.4404 |
| sp P11362 FGFR1_HUMAN | 1504.9222 | NaN       | 9783.366  |
| sp P02679 FIBG_HUMAN  | NaN       | 77.015274 | 4663.3174 |
| sp P07954 FUMH_HUMAN  | 13300.961 | NaN       | 11405.992 |
| sp Q13642 FHL1_HUMAN  | 4803.3765 | 272.72726 | 6342.4355 |
| sp Q14192 FHL2_HUMAN  | 5437.193  | NaN       | 6354.4033 |
| sp O43427 FIBP_HUMAN  | 143.71208 | NaN       | 3279.9841 |
| sp Q9BVA6 FICD_HUMAN  | 55.950047 | NaN       | 2982.8074 |
| sp Q9Y3D6 FIS1_HUMAN  | 968.5823  | NaN       | 16559.195 |
| sp Q8N6M3 FITM2_HUMAN | 0         | NaN       | 3191.459  |
| sp Q96AY3 FKB10_HUMAN | 8456.529  | 1657.7424 | 4070.6667 |
| sp Q9NYL4 FKB11_HUMAN | 1685.2057 | 643.60315 | 804.64874 |
| sp Q9NWM8 FKB14_HUMAN | 1407.1095 | NaN       | 10006.03  |
| sp P62942 FKB1A_HUMAN | 6668.2324 | 608.0666  | 2160.4148 |
| sp P26885 FKBP2_HUMAN | 6244.319  | NaN       | 5911.5693 |
| sp Q00688 FKBP3_HUMAN | 2123.8818 | NaN       | 11521.697 |
| sp Q02790 FKBP4_HUMAN | 4770.809  | NaN       | 9504.491  |
| sp Q9Y680 FKBP7_HUMAN | 2690.8416 | NaN       | 12499.43  |
| sp Q14318 FKBP8_HUMAN | 4977.422  | NaN       | 2984.4614 |
| sp O95302 FKBP9_HUMAN | 14658.639 | 430.6253  | 1447.7717 |
| sp Q5D862 FILA2_HUMAN | NaN       | 538.1114  | 198.4686  |
| sp Q13045 FLII_HUMAN  | 4914.259  | NaN       | 2478.8782 |
| sp P21333 FLNA_HUMAN  | 66873.41  | 24677.225 | 4316.6245 |
| sp O75369 FLNB_HUMAN  | 46250.6   | 1559.3142 | 3452.9265 |
| sp Q14315 FLNC_HUMAN  | 20723.518 | NaN       | 3266.7102 |
| sp O75955 FLOT1_HUMAN | 17395.986 | 248.17569 | 15341.581 |
| sp Q14254 FLOT2_HUMAN | 14021.972 | NaN       | 9203.222  |
| sp Q8IVF7 FMNL3_HUMAN | 669.7545  | NaN       | 3163.9724 |
| sp Q06828 FMOD_HUMAN  | NaN       | 410.37244 | 4510.74   |
| sp P02751 FINC_HUMAN  | 17636.678 | 4480.5566 | 19040.988 |
| sp Q9HA64 KT3K_HUMAN  | 787.366   | NaN       | 4864.0933 |
| sp Q9Y2H6 FND3A_HUMAN | 817.501   | NaN       | 12137.188 |

|                       |           |           |           |
|-----------------------|-----------|-----------|-----------|
| sp Q53EP0 FND3B_HUMAN | 996.3216  | NaN       | 11894.75  |
| sp P49354 FNNTA_HUMAN | 413.10153 | NaN       | 21461.53  |
| sp Q96NE9 FRMD6_HUMAN | 1395.6047 | NaN       | 6315.145  |
| sp O94915 FRYL_HUMAN  | 618.64136 | NaN       | 9769.866  |
| sp Q16658 FSCN1_HUMAN | 43499.312 | 885.67725 | 3546.0242 |
| sp P19883 FST_HUMAN   | 1170.7866 | NaN       | 2723.1555 |
| sp Q12841 FSTL1_HUMAN | 4202.754  | NaN       | 8429.484  |
| sp P02794 FRIH_HUMAN  | 10952.369 | 13037.013 | 1068.4143 |
| sp P02792 FRIL_HUMAN  | 2917.2192 | NaN       | 19056.982 |
| sp Q96AE4 FUBP1_HUMAN | 681.051   | NaN       | 2952.8433 |
| sp Q96I24 FUBP3_HUMAN | 795.7062  | NaN       | 5399.3066 |
| sp Q8IVP5 FUND1_HUMAN | 991.9289  | NaN       | 2196.7864 |
| sp P35637 FUS_HUMAN R | 1257.1669 | NaN       | 37699.016 |
| sp P51114 FXR1_HUMAN  | 3706.725  | NaN       | 4919.049  |
| sp Q9BQS8 FYCO1_HUMAN | 2140.694  | NaN       | 5415.103  |
| sp Q14332 FZD2_HUMAN  | 898.6324  | NaN       | 2531.487  |
| sp O75084 FZD7_HUMAN  | 1292.5164 | NaN       | 373.34097 |
| sp Q13283 G3BP1_HUMAN | 4555.3027 | NaN       | 1142.6931 |
| sp Q9UN86 G3BP2_HUMAN | 931.467   | NaN       | 4196.8643 |
| sp Q9BUM1 G6PC3_HUMAN | 497.66907 | NaN       | 8583.034  |
| sp P11413 G6PD_HUMAN  | 18990.11  | 850.8237  | 3031.2603 |
| sp P10253 LYAG_HUMAN  | 3938.7842 | NaN       | 2877.0486 |
| sp O95166 GBRAP_HUMAN | 1389.8401 | NaN       | 1424.0515 |
| sp Q9H0R8 GBRL1_HUMAN | 949.76373 | NaN       | 1358.9508 |
| sp P60520 GBRL2_HUMAN | 5590.6694 | NaN       | 14130.074 |
| sp O14976 GAK_HUMAN   | 300.90503 | NaN       | 12825.273 |
| sp Q14376 GALE_HUMAN  | 1494.6318 | NaN       | 12132.434 |
| sp P51570 GALK1_HUMAN | 3835.1624 | NaN       | 2501.2817 |
| sp Q96C23 GALM_HUMAN  | 476.9262  | NaN       | 6287.377  |
| sp Q10472 GALT1_HUMAN | 696.1386  | NaN       | 3252.7822 |
| sp Q10471 GALT2_HUMAN | 7689.0376 | 402.8408  | 4519.3423 |
| sp Q7Z7M9 GALT5_HUMAN | 1223.2936 | NaN       | 5821.124  |
| sp Q8NCL4 GALT6_HUMAN | 131.20644 | NaN       | 2149.787  |

|                           |           |           |           |
|---------------------------|-----------|-----------|-----------|
| sp Q86SF2 GALT7_HUMAN     | 4539.5195 | NaN       | 9803.035  |
| sp Q14353 GAMT_HUMAN      | 241.10803 | NaN       | 1112.1511 |
| sp Q14697 GANAB_HUMAN     | 14283.549 | 2356.2773 | 34458.707 |
| sp P04406 G3P_HUMAN       | 163236.06 | 21248.807 | 8408.704  |
| sp Q14C86 GAPD1_HUMAN     | 186.43344 | NaN       | 2279.6187 |
| sp P41250 GARS_HUMAN      | 6473.7393 | NaN       | 63233.293 |
| sp P22102 PUR2_HUMAN      | 3767.83   | NaN       | 31659.637 |
| sp Q14393 GAS6_HUMAN      | 2644.3853 | NaN       | 5258.547  |
| sp A0A0B4J2D5 GAL3B_HUMAN | 266.64508 | NaN       | 16672.562 |
| sp P04062 GBA1_HUMAN      | 7390.0723 | 2014.4298 | 4026.7117 |
| sp Q04446 GLGB_HUMAN      | 4360.6484 | NaN       | 21084.781 |
| sp Q92538 GBF1_HUMAN      | 2978.9407 | NaN       | 7960.494  |
| sp P32455 GBP1_HUMAN      | 1404.8359 | NaN       | 145.40263 |
| sp P02774 VTDB_HUMAN      | 17714.465 | 22342.33  | 25265.043 |
| sp Q14397 GCKR_HUMAN      | 611.14636 | NaN       | 831.1848  |
| sp P48507 GSH0_HUMAN      | 4276.732  | NaN       | 5363.554  |
| sp Q92616 GCN1_HUMAN      | 15273.877 | NaN       | 14048.805 |
| sp P23434 GCSH_HUMAN      | 917.41187 | NaN       | 1811.6006 |
| sp Q9NZC3 GDE1_HUMAN      | 851.9072  | NaN       | 8447.951  |
| sp P31150 GDIA_HUMAN      | 44047.03  | 229.33708 | 3052.8555 |
| sp P50395 GDIB_HUMAN      | 11046.133 | 2124.1238 | 13536.281 |
| sp Q8TEQ6 GEMI5_HUMAN     | 767.86383 | NaN       | 37796.926 |
| sp O43681 GET3_HUMAN      | 8202.726  | NaN       | 1139.224  |
| sp Q7L5D6 GET4_HUMAN      | 324.17938 | NaN       | 7787.039  |
| sp Q96RP9 EFGM_HUMAN      | 774.6318  | NaN       | 5540.5415 |
| sp Q06210 GFPT1_HUMAN     | 13297.546 | 495.85413 | 8262.857  |
| sp Q13630 FCL_HUMAN       | 636.88403 | 639.12537 | 4826.375  |
| sp Q92820 GGH_HUMAN       | 3662.5007 | NaN       | 6866.074  |
| sp Q9H3K2 GHITM_HUMAN     | 1301.8252 | NaN       | 3272.1265 |
| sp Q9NWU2 GID8_HUMAN      | 0         | NaN       | 1209.082  |
| sp Q9NU53 GINM1_HUMAN     | 599.57526 | NaN       | 11961.938 |
| sp O14908 GIPC1_HUMAN     | 2428.6272 | NaN       | 1870.9044 |
| sp P17302 CXA1_HUMAN      | 29001.646 | 1515.5973 | 6317.283  |

|                       |            |           |            |
|-----------------------|------------|-----------|------------|
| sp P36383 CXG1_HUMAN  | 267.90585  | NaN       | 35213.77   |
| sp P32189 GLPK_HUMAN  | 1961.3728  | 248.50615 | 19090.514  |
| sp P06280 AGAL_HUMAN  | 778.99927  | NaN       | 28914.105  |
| sp P16278 BGAL_HUMAN  | 3502.04    | NaN       | 7824.2314  |
| sp O94923 GLCE_HUMAN  | 679.61536  | NaN       | 3107.2952  |
| sp Q92896 GSLG1_HUMAN | 13902.444  | NaN       | 4059.8176  |
| sp P48060 GLIP1_HUMAN | 6395.559   | NaN       | 3216.288   |
| sp Q9H4G4 GAPR1_HUMAN | 1743.3794  | NaN       | 6036.2695  |
| sp Q8WWB7 GLMP_HUMAN  | 2059.0942  | NaN       | 615.6711   |
| sp Q04760 LGUL_HUMAN  | 4115.577   | NaN       | 5786.654   |
| sp Q9HC38 GLOD4_HUMAN | 1341.364   | NaN       | 749.75037  |
| sp P35754 GLRX1_HUMAN | 895.4673   | NaN       | 88859.86   |
| sp O76003 GLRX3_HUMAN | 4185.365   | NaN       | 2419.405   |
| sp Q86SX6 GLRX5_HUMAN | 1429.7877  | NaN       | 3867.7808  |
| sp O94925 GLSK_HUMAN  | 3617.6123  | NaN       | 23664.203  |
| sp Q68CQ7 GL8D1_HUMAN | 1014.05566 | NaN       | 6835.4653  |
| sp Q9H1C3 GL8D2_HUMAN | 0          | NaN       | 11950.025  |
| sp Q9NZD2 GLTP_HUMAN  | 289.98627  | NaN       | 14315.39   |
| sp P00367 DHE3_HUMAN  | 7388.2505  | 1716.6963 | 6252.0015  |
| sp O60547 GMDS_HUMAN  | 542.7065   | NaN       | 11633.6875 |
| sp P60983 GMFB_HUMAN  | 1452.1465  | NaN       | 8864.636   |
| sp Q96IJ6 GMPPA_HUMAN | 2446.9363  | NaN       | 2616.315   |
| sp Q9Y5P6 GMPPB_HUMAN | 1681.6127  | NaN       | 10098.181  |
| sp Q9P2T1 GMPR2_HUMAN | 1832.7988  | NaN       | 6784.2407  |
| sp P49915 GUAA_HUMAN  | 3955.0447  | NaN       | 1707.5958  |
| sp P29992 GNA11_HUMAN | 12373.492  | NaN       | 43563.367  |
| sp Q14344 GNA13_HUMAN | 7693.0005  | NaN       | 12271.937  |
| sp P63096 GNAI1_HUMAN | 2439.909   | NaN       | 4198.135   |
| sp P04899 GNAI2_HUMAN | 35200.02   | 3157.4958 | 2223.676   |
| sp P08754 GNAI3_HUMAN | 4516.149   | NaN       | 14912.733  |
| sp P50148 GNAQ_HUMAN  | 3385.8457  | NaN       | 3695.7466  |
| sp P63092 GNAS2_HUMAN | 8416.661   | 241.81738 | 8512.124   |
| sp P62873 GBB1_HUMAN  | 18749.24   | 887.062   | 9212.628   |

|                       |           |           |           |
|-----------------------|-----------|-----------|-----------|
| sp P62879 GBB2_HUMAN  | 15927.791 | 2061.2446 | 4488.972  |
| sp Q9HAV0 GBB4_HUMAN  | 654.39026 | NaN       | 3622.3381 |
| sp Q9Y223 GLCNE_HUMAN | 924.5418  | NaN       | 8732.85   |
| sp P50151 GBG10_HUMAN | 0         | NaN       | 9807.605  |
| sp Q9UBI6 GBG12_HUMAN | 6373.2954 | 192.35002 | 5207.3735 |
| sp P59768 GBG2_HUMAN  | 5946.998  | NaN       | 11310.485 |
| sp A0A804HLA8 GBG5B_H | 913.28424 | NaN       | 2740.793  |
| sp O15228 GNPAT_HUMAN | 2192.693  | NaN       | 4955.175  |
| sp P46926 GNPI1_HUMAN | 6961.45   | NaN       | 3249.4675 |
| sp Q8TDQ7 GNPI2_HUMAN | 1036.9071 | NaN       | 2301.7483 |
| sp Q96EK6 GNA1_HUMAN  | 200.67314 | NaN       | 7328.076  |
| sp P15586 GNS_HUMAN   | 6311.0312 | 1655.2852 | 20117.51  |
| sp Q7Z5G4 GOGA7_HUMAN | 3222.882  | NaN       | 1619.901  |
| sp Q14789 GGOB1_HUMAN | 176.28455 | 293.13266 | 13394.626 |
| sp O00461 GOLI4_HUMAN | 4213.423  | 83.49337  | 353.16898 |
| sp Q8NBJ4 GOLM1_HUMAN | 1512.3179 | NaN       | 1030.3591 |
| sp Q6P4E1 GOLM2_HUMAN | 2557.951  | NaN       | 5288.043  |
| sp Q9H4A6 GOLP3_HUMAN | 1407.2615 | NaN       | 5406.2656 |
| sp Q9Y3E0 GOT1B_HUMAN | 1927.3513 | NaN       | 9671.221  |
| sp Q9HD26 GOPC_HUMAN  | 272.324   | NaN       | 9230.374  |
| sp Q9H8Y8 GORS2_HUMAN | 721.3016  | NaN       | 5450.8076 |
| sp O14653 GOSR2_HUMAN | 2826.925  | NaN       | 14564.132 |
| sp P17174 AATC_HUMAN  | 3912.6523 | NaN       | 22935.86  |
| sp P00505 AATM_HUMAN  | 14099.967 | 1389.8383 | 17024.48  |
| sp O43292 GPAA1_HUMAN | 2352.1106 | NaN       | 3293.3372 |
| sp Q86UL3 GPAT4_HUMAN | 261.56183 | NaN       | 1838.0352 |
| sp P35052 GPC1_HUMAN  | 10239.751 | NaN       | 1839.4042 |
| sp Q9Y625 GPC6_HUMAN  | 4600.463  | NaN       | 708.5092  |
| sp Q8N335 GPD1L_HUMAN | 2941.9832 | NaN       | 4092.4287 |
| sp P43304 GPDM_HUMAN  | 6330.9497 | NaN       | 7829.678  |
| sp P06744 G6PI_HUMAN  | 14709.764 | 1416.3994 | 2396.416  |
| sp Q14956 GPNMB_HUMAN | 1919.226  | 322.7814  | 8688.286  |
| sp Q5VW38 GP107_HUMAN | 3126.3174 | NaN       | 4655.449  |

|                       |            |           |            |
|-----------------------|------------|-----------|------------|
| sp Q14439 GP176_HUMAN | 1327.534   | NaN       | 3160.6938  |
| sp Q13098 CSN1_HUMAN  | 2353.1143  | NaN       | 18249.52   |
| sp Q86YR5 GPSM1_HUMAN | 735.82404  | NaN       | 9851.381   |
| sp P07203 GPX1_HUMAN  | 11559.165  | 257.68808 | 1661.1534  |
| sp P22352 GPX3_HUMAN  | 800.27527  | NaN       | 7108.7954  |
| sp P36969 GPX4_HUMAN  | 5363.3457  | NaN       | 1485.6426  |
| sp Q8TED1 GPX8_HUMAN  | 8403.762   | 335.7521  | 1016.78845 |
| sp P62993 GRB2_HUMAN  | 1814.9951  | NaN       | 12642.919  |
| sp O60565 GREM1_HUMAN | 7494.3594  | 332.21637 | 5016.761   |
| sp Q9UBQ7 GRHPR_HUMAN | 5571.735   | NaN       | 14513.317  |
| sp P34947 GRK5_HUMAN  | 143.50256  | NaN       | 2029.2231  |
| sp P28799 GRN_HUMAN   | 5979.5005  | 469.69806 | 2896.2424  |
| sp Q9HAV7 GRPE1_HUMAN | 1868.9299  | 174.29626 | 14405.18   |
| sp Q9BQ67 GRWD1_HUMAN | 2438.737   | NaN       | 648.55786  |
| sp O60443 GSDME_HUMAN | 69822.97   | NaN       | 5009.339   |
| sp P06396 GELS_HUMAN  | 36188.1    | 7141.5547 | 45.811466  |
| sp P15170 ERF3A_HUMAN | 6733.696   | NaN       | 7074.252   |
| sp Q8IYD1 ERF3B_HUMAN | 228.39523  | NaN       | 4260.2183  |
| sp P00390 GSHR_HUMAN  | 3329.664   | 2901.831  | 1557.9083  |
| sp P48637 GSHB_HUMAN  | 3409.0288  | NaN       | 4235.286   |
| sp Q9Y2Q3 GSTK1_HUMAN | 6735.4844  | NaN       | 2877.844   |
| sp P28161 GSTM2_HUMAN | 5425.9194  | 589.6626  | 11384.01   |
| sp P21266 GSTM3_HUMAN | 10123.414  | NaN       | 2348.4014  |
| sp Q03013 GSTM4_HUMAN | 1610.3389  | NaN       | 7633.1675  |
| sp P78417 GSTO1_HUMAN | 9099.333   | 941.60376 | 12424.864  |
| sp P09211 GSTP1_HUMAN | 17135.277  | 2026.4221 | 3883.668   |
| sp Q9BZE4 GTPB4_HUMAN | 300.3063   | NaN       | 15783.971  |
| sp Q16774 KGUA_HUMAN  | 568.71277  | NaN       | 7247.15    |
| sp Q9UBP9 GULP1_HUMAN | 138.57956  | NaN       | 6688.7686  |
| sp P46976 GLYG_HUMAN  | 4768.503   | NaN       | 874.78705  |
| sp P04921 GLPC_HUMAN  | 698.17114  | NaN       | 1725.8014  |
| sp P07305 H10_HUMAN   | 1240.1521  | NaN       | 11334.768  |
| sp Q92522 H1X_HUMAN   | 119.896835 | NaN       | 3983.0803  |

|                       |           |           |           |
|-----------------------|-----------|-----------|-----------|
| sp P16403 H12_HUMAN   | 1008.0477 | NaN       | 4486.034  |
| sp P16402 H13_HUMAN   | 594.62103 | NaN       | 4006.775  |
| sp P10412 H14_HUMAN   | 19422.086 | 1018.6121 | 8152.0205 |
| sp P16401 H15_HUMAN   | 13569.928 | 932.7014  | 9308.592  |
| sp Q8IUE6 H2A2B_HUMAN | 932.83026 | NaN       | 22026.916 |
| sp P04908 H2A1B_HUMAN | 22691.434 | 1099.1229 | 1352.2861 |
| sp P16104 H2AX_HUMAN  | 67709.92  | 2877.5703 | 2841.117  |
| sp P0C0S5 H2AZ_HUMAN  | 3418.395  | NaN       | 2951.5361 |
| sp P06899 H2B1J_HUMAN | 79882.46  | 2864.4087 | 6969.608  |
| sp O60814 H2B1K_HUMAN | 11423.31  | NaN       | 22323.934 |
| sp Q5TEC6 H37_HUMAN   | 8430.049  | 492.21994 | 2693.3687 |
| sp P68431 H31_HUMAN   | 11552.197 | 1295.3259 | 14685.089 |
| sp P62805 H4_HUMAN    | 70681.49  | 4104.89   | 12759.851 |
| sp O95479 G6PE_HUMAN  | 6462.3896 | NaN       | 491.73322 |
| sp Q14520 HABP2_HUMAN | 1003.0354 | NaN       | 8456.004  |
| sp Q9P035 HACD3_HUMAN | 8221.6    | 1883.53   | 1991.7706 |
| sp Q16836 HCDH_HUMAN  | 2446.131  | NaN       | 9944.353  |
| sp P40939 ECHA_HUMAN  | 10238.842 | 2985.882  | 464.80475 |
| sp P55084 ECHB_HUMAN  | 6817.4272 | 3114.9568 | 2862.305  |
| sp P12081 HARS1_HUMAN | 3029.485  | NaN       | 4365.422  |
| sp P49590 SYHM_HUMAN  | 704.359   | NaN       | 1488.6741 |
| sp O14929 HAT1_HUMAN  | 650.56995 | NaN       | 2763.821  |
| sp P69905 HBA_HUMAN H | 58200.785 | 4541.052  | 3731.776  |
| sp P02042 HBD_HUMAN H | 31345.281 | 2926.251  | 15541.374 |
| sp P69891 HBG1_HUMAN  | 41273.46  | 3220.0688 | 6475.7573 |
| sp Q9Y450 HBS1L_HUMAN | 1956.9707 | NaN       | 2667.9182 |
| sp P53701 CCHL_HUMAN  | 335.03748 | NaN       | 9177.946  |
| sp O15379 HDAC3_HUMAN | 414.5958  | NaN       | 8841.209  |
| sp Q7Z4H3 HDDC2_HUMAN | 75.443985 | NaN       | 4307.9565 |
| sp P51858 HDGF_HUMAN  | 1164.5807 | NaN       | 1042.0708 |
| sp Q00341 VIGLN_HUMAN | 6779.737  | NaN       | 6334.796  |
| sp Q6AI08 HEAT6_HUMAN | 95.089066 | NaN       | 412.92303 |
| sp Q9NRV9 HEBP1_HUMAN | 7965.506  | NaN       | 2711.1067 |



|                       |           |           |           |
|-----------------------|-----------|-----------|-----------|
| sp Q9Y5Z4 HEBP2_HUMAN | 2147.5657 | NaN       | 1727.6643 |
| sp Q9ULI3 HEG1_HUMAN  | 2334.1494 | NaN       | 8756.654  |
| sp Q5GLZ8 HERC4_HUMAN | 3782.151  | NaN       | 10077.236 |
| sp P06865 HEXA_HUMAN  | 4659.985  | NaN       | 3708.118  |
| sp P07686 HEXB_HUMAN  | 10883.325 | 1208.1334 | 11976.529 |
| sp Q30201 HFE_HUMAN   | 702.3502  | NaN       | 5560.7144 |
| sp Q04756 HGFA_HUMAN  | 4132.7695 | 1230.0222 | 6362.2188 |
| sp O14964 HGS_HUMAN   | 2031.5995 | NaN       | 2612.1655 |
| sp Q68CP4 HGNAT_HUMAN | 815.6493  | NaN       | 11345.89  |
| sp P31937 3HIDH_HUMAN | 8236.6875 | NaN       | 3101.5024 |
| sp Q9Y241 HIG1A_HUMAN | 307.66434 | NaN       | 2696.5732 |
| sp P49773 HINT1_HUMAN | 2491.2178 | NaN       | 3175.093  |
| sp Q9BX68 HINT2_HUMAN | 1233.8877 | NaN       | 534.19824 |
| sp Q9NQE9 HINT3_HUMAN | 171.44162 | NaN       | 756.57996 |
| sp O00291 HIP1_HUMAN  | 2156.757  | NaN       | 1041.7502 |
| sp P19367 H XK1_HUMAN | 11553.812 | 1619.9679 | 11525.428 |
| sp P52789 H XK2_HUMAN | 2599.8582 | NaN       | 3589.117  |
| sp P04439 HLAA_HUMAN  | 23530.094 | 1164.4745 | 3727.6663 |
| sp P01889 HLAB_HUMAN  | 13432.112 | 718.809   | 3131.7065 |
| sp P10321 HLAC_HUMAN  | 13212.021 | NaN       | 12186.824 |
| sp P13747 HLAE_HUMAN  | 4213.2866 | NaN       | 248.73622 |
| sp P01893 HLAH_HUMAN  | 25596.129 | 2015.0754 | 7370.2363 |
| sp Q8TCT9 HM13_HUMAN  | 18921.426 | 1121.2878 | 28647.766 |
| sp P17096 HMGA1_HUMAN | 1513.5343 | NaN       | 3631.8025 |
| sp P09429 HMGB1_HUMAN | 6843.1553 | NaN       | 4061.3303 |
| sp P26583 HMGB2_HUMAN | 951.4605  | NaN       | 1528.5857 |
| sp P35914 HMGCL_HUMAN | 5348.5664 | NaN       | 1396.5221 |
| sp Q01581 HMCS1_HUMAN | 3088.9077 | NaN       | 4351.648  |
| sp P09601 HMOX1_HUMAN | 4563.9487 | NaN       | 16838.521 |
| sp P30519 HMOX2_HUMAN | 2361.8135 | NaN       | 8351.363  |
| sp Q13151 ROA0_HUMAN  | 519.4994  | NaN       | 11008.464 |
| sp P09651 ROA1_HUMAN  | 13087.98  | 1270.9502 | 360.72055 |
| sp P22626 ROA2_HUMAN  | 6093.475  | 1934.7454 | 3919.4026 |

|                       |           |           |           |
|-----------------------|-----------|-----------|-----------|
| sp P51991 ROA3_HUMAN  | 8376.431  | NaN       | 1967.3746 |
| sp Q99729 ROAA_HUMAN  | 1100.424  | NaN       | 3952.8345 |
| sp P07910 HNRPC_HUMAN | 10152.029 | NaN       | 33022.277 |
| sp Q14103 HNRPD_HUMAN | 14020.135 | 1949.8403 | 2360.1973 |
| sp O14979 HNRDL_HUMAN | 3987.1821 | NaN       | 9249.738  |
| sp P52597 HNRPF_HUMAN | 3668.0981 | NaN       | 5007.136  |
| sp P31943 HNRH1_HUMAN | 10066.587 | NaN       | 13858.464 |
| sp P55795 HNRH2_HUMAN | 2570.03   | NaN       | 6501.215  |
| sp P31942 HNRH3_HUMAN | 2352.6711 | 568.76105 | 23012.803 |
| sp P61978 HNRPK_HUMAN | 7826.281  | 1455.8964 | 39169.844 |
| sp P14866 HNRPL_HUMAN | 6360.4927 | NaN       | 25908.562 |
| sp Q8WV9 HNRL_HUMAN   | 788.3284  | NaN       | 23045.97  |
| sp P52272 HNRPM_HUMAN | 22596.555 | 537.4143  | 9925.045  |
| sp O43390 HNRPR_HUMAN | 3230.2568 | NaN       | 18120.254 |
| sp Q00839 HNRPU_HUMAN | 15538.005 | 619.8915  | 5544.621  |
| sp Q9BUJ2 HNRL1_HUMAN | 3058.5598 | NaN       | 2181.4805 |
| sp Q1KMD3 HNRL2_HUMAN | 5141.365  | NaN       | 4734.3306 |
| sp Q86VS8 HOOK3_HUMAN | 268.7043  | NaN       | 297.35892 |
| sp Q5SSJ5 HP1B3_HUMAN | 3109.9124 | NaN       | 5056.0605 |
| sp P37235 HPCL1_HUMAN | 6966.709  | NaN       | 6540.3027 |
| sp P00492 HPRT_HUMAN  | 2730.6643 | NaN       | 1795.2617 |
| sp P02790 HEMO_HUMAN  | 9621.11   | 4416.092  | 29382.166 |
| sp P01112 RASH_HUMAN  | 5781.446  | NaN       | 4966.7427 |
| sp P04196 HRG_HUMAN H | 4072.7075 | 981.44836 | 9983.429  |
| sp Q53T59 H1BP3_HUMAN | 340.40585 | NaN       | 18982.531 |
| sp Q7LGA3 HS2ST_HUMAN | 2702.571  | NaN       | 4341.5776 |
| sp O75506 HSBP1_HUMAN | 178.39302 | NaN       | 5084.6123 |
| sp Q99714 HCD2_HUMAN  | 7110.791  | 168.8176  | 682.6729  |
| sp Q8NBQ5 DHB11_HUMAN | 12204.111 | NaN       | 14717.247 |
| sp Q53GQ0 DHB12_HUMAN | 11681.414 | 669.1658  | 11011.963 |
| sp P51659 DHB4_HUMAN  | 26091.244 | 703.89386 | 842.01447 |
| sp Q3SXM5 HSDL1_HUMAN | 674.8905  | NaN       | 4841.8184 |
| sp Q6YN16 HSDL2_HUMAN | 3672.4324 | NaN       | 1482.199  |

|                       |           |           |           |
|-----------------------|-----------|-----------|-----------|
| sp P07900 HS90A_HUMAN | 27914.693 | 1937.6083 | 11630.328 |
| sp P08238 HS90B_HUMAN | 65591.17  | 10679.027 | 17967.645 |
| sp P14625 ENPL_HUMAN  | 52141.277 | 8571.68   | 17890.17  |
| sp P48723 HSP13_HUMAN | 2246.481  | NaN       | 5339.9585 |
| sp Q0VDF9 HSP7E_HUMAN | 5704.5767 | NaN       | 9122.076  |
| sp P0DMV8 HS71A_HUMAN | 7416.754  | 3743.773  | 3632.6658 |
| sp P54652 HSP72_HUMAN | 59760.633 | 3768.5144 | 9410.977  |
| sp P34932 HSP74_HUMAN | 24763.158 | 422.83765 | 10573.008 |
| sp O95757 HS74L_HUMAN | 4383.1143 | NaN       | 12084.085 |
| sp P11021 BIP_HUMAN   | 90876.164 | 12263.184 | 11268.769 |
| sp P11142 HSP7C_HUMAN | 47090.695 | 5603.359  | 4242.5366 |
| sp P38646 GRP75_HUMAN | 23035.715 | 13866.764 | 1457.9226 |
| sp P04792 HSPB1_HUMAN | 21894.295 | 555.446   | 12677.582 |
| sp Q9NZL4 HPBP1_HUMAN | 1483.357  | NaN       | 8909.506  |
| sp P10809 CH60_HUMAN  | 41659.46  | 4872.6475 | 19679.566 |
| sp P61604 CH10_HUMAN  | 18267.273 | 2036.053  | 9851.047  |
| sp P98160 PGBM_HUMAN  | 7949.4663 | NaN       | 3513.5054 |
| sp Q92598 HS105_HUMAN | 18550.637 | NaN       | 2625.568  |
| sp Q9BUP3 HTAI2_HUMAN | 1414.7515 | NaN       | 8404.082  |
| sp P42858 HD_HUMAN    | 1065.452  | NaN       | 3477.9717 |
| sp Q7Z6Z7 HUWE1_HUMAN | 3720.9153 | NaN       | 1924.2766 |
| sp Q96D96 HVCN1_HUMAN | 224.4026  | NaN       | 598.26624 |
| sp Q9Y4L1 HYOU1_HUMAN | 8414.578  | 2125.7666 | 7468.302  |
| sp Q2TAA2 IAH1_HUMAN  | 481.43143 | NaN       | 9974.909  |
| sp P41252 SYIC_HUMAN  | 4992.594  | NaN       | 6321.6895 |
| sp Q9NSE4 SYIM_HUMAN  | 2761.042  | NaN       | 28138.496 |
| sp P05362 ICAM1_HUMAN | 14801.854 | NaN       | 11722.248 |
| sp O60725 ICMT_HUMAN  | 600.44415 | NaN       | 8740.216  |
| sp P14735 IDE_HUMAN   | 5139.302  | NaN       | 3873.007  |
| sp O75874 IDHC_HUMAN  | 10007.503 | 191.87962 | 15329.42  |
| sp P48735 IDHP_HUMAN  | 5939.6846 | NaN       | 3456.0857 |
| sp P50213 IDH3A_HUMAN | 2794.596  | NaN       | 28473.86  |
| sp O43837 IDH3B_HUMAN | 2603.447  | NaN       | 6929.7104 |

|                           |           |           |           |
|---------------------------|-----------|-----------|-----------|
| sp P51553 IDH3G_HUMAN     | 1498.1416 | NaN       | 4369.984  |
| sp Q13907 ID11_HUMAN      | 1116.8154 | NaN       | 12510.264 |
| sp Q9Y5U9 IR3IP_HUMAN     | 3672.651  | NaN       | 3217.8323 |
| sp Q13325 IFIT5_HUMAN     | 448.91772 | NaN       | 8109.92   |
| sp Q01628 IFM3_HUMAN      | 18109.045 | 1453.612  | 9876.135  |
| sp P15260 INGR1_HUMAN     | 2506.358  | NaN       | 159859.06 |
| sp Q9BW83 IFT27_HUMAN     | 332.4214  | NaN       | 12608.046 |
| sp P78318 IGBP1_HUMAN     | 214.87695 | NaN       | 1622.8365 |
| sp P08069 IGF1R_HUMAN     | 813.5137  | NaN       | 7530.3384 |
| sp P01344 IGF2_HUMAN      | 1740.1351 | 232.7731  | 3884.7817 |
| sp Q9Y6M1 IF2B2_HUMAN     | 2142.4985 | NaN       | 4345.258  |
| sp O00425 IF2B3_HUMAN     | 677.7484  | NaN       | 9244.517  |
| sp P11717 MPRI_HUMAN      | 6997.334  | 1445.2257 | 162.59134 |
| sp P18065 IBP2_HUMAN      | 2176.626  | 1470.5405 | 2532.3257 |
| sp P22692 IBP4_HUMAN      | 880.99603 | NaN       | 982.19696 |
| sp P24593 IBP5_HUMAN      | 8843.904  | NaN       | 263.95972 |
| sp Q16270 IBP7_HUMAN      | 1343.4419 | NaN       | 8047.912  |
| sp P01857 IGHG1_HUMAN     | 1133.329  | 236.3824  | 3963.944  |
| sp P01871 IGHM_HUMAN      | 1832.6276 | NaN       | 4775.0522 |
| sp P01834 IGKC_HUMAN      | 993.3724  | 1178.2195 | 11105.406 |
| sp A0A075B6P5 KV228_HUMAN | 204.7446  | NaN       | 521.5844  |
| sp Q969P0 IGSF8_HUMAN     | 7448.5376 | NaN       | 6427.483  |
| sp Q70UQ0 IKIP_HUMAN      | 13896.938 | 1446.7678 | 9695.813  |
| sp P78552 I13R1_HUMAN     | 1938.5027 | NaN       | 1119.4069 |
| sp Q96F46 I17RA_HUMAN     | 882.679   | NaN       | 6117.8076 |
| sp P14778 IL1R1_HUMAN     | 348.29913 | NaN       | 9997.151  |
| sp Q9NPH3 IL1AP_HUMAN     | 315.07672 | NaN       | 7481.619  |
| sp P40189 IL6RB_HUMAN     | 14565.834 | NaN       | 13748.72  |
| sp Q12905 ILF2_HUMAN      | 6269.193  | NaN       | 8581.616  |
| sp Q12906 ILF3_HUMAN      | 4489.707  | NaN       | 4138.6235 |
| sp Q13418 ILK_HUMAN       | 5500.5493 | NaN       | 3174.2483 |
| sp A1L0T0 HACL2_HUMAN     | 7719.9727 | NaN       | 22896.615 |
| sp Q16891 MIC60_HUMAN     | 7343.062  | 1376.2687 | 11041.909 |

|                       |           |           |            |
|-----------------------|-----------|-----------|------------|
| sp P29218 IMPA1_HUMAN | 1273.3884 | NaN       | 1167.7383  |
| sp P12268 IMDH2_HUMAN | 9138.127  | NaN       | 4702.5244  |
| sp Q27J81 INF2_HUMAN  | 5621.55   | NaN       | 14384.028  |
| sp P49441 INPP_HUMAN  | 1168.6854 | NaN       | 15058.257  |
| sp Q14642 I5P1_HUMAN  | 0         | NaN       | 3960.383   |
| sp Q9BT40 INP5K_HUMAN | 763.17206 | NaN       | 11704.495  |
| sp O15357 SHIP2_HUMAN | 2429.4915 | NaN       | 9632.533   |
| sp Q9UI26 IPO11_HUMAN | 209.58252 | NaN       | 12774.077  |
| sp Q8TEX9 IPO4_HUMAN  | 3488.46   | NaN       | 7092.019   |
| sp O00410 IPO5_HUMAN  | 9282.233  | NaN       | 95.5547    |
| sp O95373 IPO7_HUMAN  | 8318.376  | NaN       | 9227.159   |
| sp O15397 IPO8_HUMAN  | 142.57301 | NaN       | 5952.6636  |
| sp Q96P70 IPO9_HUMAN  | 4221.163  | NaN       | 2001.9917  |
| sp P46940 IQGA1_HUMAN | 12492.015 | 4419.4424 | 32211.23   |
| sp Q86VI3 IQGA3_HUMAN | 3352.6438 | NaN       | 4827.2783  |
| sp Q8WZA9 IRGQ_HUMAN  | 1188.7717 | NaN       | 5145.0425  |
| sp P05161 ISG15_HUMAN | 2507.3574 | NaN       | 298.04504  |
| sp Q96AB3 ISOC2_HUMAN | 1035.1421 | NaN       | 1874.5242  |
| sp P53990 IST1_HUMAN  | 2552.8328 | NaN       | 8801.258   |
| sp Q96J02 ITCH_HUMAN  | 12017.608 | NaN       | 6905.0566  |
| sp Q8TB96 TIP_HUMAN   | 1710.6652 | NaN       | 7501.02    |
| sp P56199 ITA1_HUMAN  | 5489.6807 | NaN       | 4069.247   |
| sp O75578 ITA10_HUMAN | 207.53606 | NaN       | 79.20053   |
| sp P17301 ITA2_HUMAN  | 15868.566 | 8170.1836 | 13216.65   |
| sp P26006 ITA3_HUMAN  | 23558.666 | 333.47284 | 11066.8955 |
| sp P13612 ITA4_HUMAN  | 5039.1846 | NaN       | 5363.4873  |
| sp P08648 ITA5_HUMAN  | 15341.049 | 1764.2803 | 13659.435  |
| sp P23229 ITA6_HUMAN  | 7792.1016 | NaN       | 379.6017   |
| sp P53708 ITA8_HUMAN  | 7702.0317 | NaN       | 3399.8347  |
| sp P38570 ITAE_HUMAN  | NaN       | 333.4403  | 1419.1207  |
| sp P06756 ITAV_HUMAN  | 34940.8   | 2146.165  | 746.32043  |
| sp P05556 ITB1_HUMAN  | 70703.56  | 3729.2073 | 7117.726   |
| sp P05106 ITB3_HUMAN  | 9443.024  | NaN       | 5011.1665  |

|                       |           |           |           |
|-----------------------|-----------|-----------|-----------|
| sp P18084 ITB5_HUMAN  | 5168.0605 | NaN       | 10894.859 |
| sp P19827 ITIH1_HUMAN | 6166.286  | 2219.116  | 2471.0728 |
| sp P19823 ITIH2_HUMAN | 40568.27  | 16685.273 | 2006.3102 |
| sp Q06033 ITIH3_HUMAN | 11067.496 | 2139.3418 | 2428.7693 |
| sp Q14624 ITIH4_HUMAN | 13275.859 | 6154.555  | 4819.2725 |
| sp Q9Y287 ITM2B_HUMAN | 27010.24  | 299.50885 | 264.94595 |
| sp Q9NQX7 ITM2C_HUMAN | 11705.908 | 162.47864 | 7988.3667 |
| sp Q9BY32 ITPA_HUMAN  | 1944.8141 | NaN       | 11832.704 |
| sp Q14573 ITPR3_HUMAN | 3990.4463 | NaN       | 4794.1    |
| sp P28290 ITPI2_HUMAN | 7093.0386 | NaN       | 15158.743 |
| sp P26440 IVD_HUMAN   | 2087.002  | NaN       | 2920.3342 |
| sp Q8N5M9 JAGN1_HUMAN | 1999.2661 | NaN       | 386.9595  |
| sp P23458 JAK1_HUMAN  | 4141.212  | NaN       | 9702.58   |
| sp Q9BX67 JAM3_HUMAN  | 2489.3923 | NaN       | 6054.3755 |
| sp P01591 IGJ_HUMAN   | 1969.6694 | NaN       | 79.38853  |
| sp Q9UK76 JUP11_HUMAN | 1610.9281 | NaN       | 2681.8647 |
| sp O76095 JTB_HUMAN   | 374.55615 | NaN       | 4666.4526 |
| sp Q63ZY3 KANK2_HUMAN | 1230.7281 | NaN       | 7402.3164 |
| sp Q15046 SYK_HUMAN   | 2993.141  | NaN       | 1157.2273 |
| sp Q9Y6H6 KCNE3_HUMAN | 444.90878 | NaN       | 3121.873  |
| sp Q99712 KCJ15_HUMAN | 753.1179  | NaN       | 453.5286  |
| sp Q12791 KCMA1_HUMAN | 5008.138  | NaN       | 4084.803  |
| sp Q8NC54 KCT2_HUMAN  | 622.97516 | NaN       | 5356.5757 |
| sp Q96CX2 KCD12_HUMAN | 6727.6885 | NaN       | 4754.522  |
| sp P24390 ERD21_HUMAN | 2616.5283 | 445.19766 | 46153.79  |
| sp P33947 ERD22_HUMAN | 2188.3086 | NaN       | 10209.641 |
| sp O43731 ERD23_HUMAN | 3633.018  | NaN       | 3506.9075 |
| sp Q06136 KDSR_HUMAN  | 3596.03   | NaN       | 9431.356  |
| sp Q14145 KEAP1_HUMAN | 2448.8389 | 2904.4348 | 3012.524  |
| sp Q07666 KHDR1_HUMAN | 1643.1592 | NaN       | 3196.5728 |
| sp Q92945 FUBP2_HUMAN | 1991.4178 | NaN       | 29243.238 |
| sp Q5T5P2 SKT_HUMAN   | 293.93234 | NaN       | 217.62572 |
| sp Q8IYS2 K2013_HUMAN | 589.5581  | NaN       | 6419.7104 |

|                       |           |           |            |
|-----------------------|-----------|-----------|------------|
| sp P52732 KIF11_HUMAN | 0         | NaN       | 12821.719  |
| sp Q9NS87 KIF15_HUMAN | 749.89105 | NaN       | 10788.8125 |
| sp Q02241 KIF23_HUMAN | 1746.1708 | NaN       | 1462.6375  |
| sp O00139 KIF2A_HUMAN | 438.409   | NaN       | 3596.3718  |
| sp P33176 KINH_HUMAN  | 16064.13  | NaN       | 1277.2754  |
| sp Q96EK5 KBP_HUMAN   | 582.93555 | NaN       | 669.01953  |
| sp Q96J84 KIRR1_HUMAN | 8051.53   | NaN       | 35097.367  |
| sp Q07866 KLC1_HUMAN  | 12385.371 | NaN       | 2188.1172  |
| sp Q9H0B6 KLC2_HUMAN  | 307.91766 | NaN       | 10133.754  |
| sp Q53GT1 KLH22_HUMAN | 620.83057 | NaN       | 1885.6326  |
| sp P01042 KNG1_HUMAN  | 556.78766 | NaN       | 11268.793  |
| sp P52294 IMA5_HUMAN  | 1147.1937 | NaN       | 5309.7866  |
| sp P52292 IMA1_HUMAN  | 1610.9268 | NaN       | 2347.0022  |
| sp O00505 IMA4_HUMAN  | 2592.7063 | NaN       | 498.3036   |
| sp O00629 IMA3_HUMAN  | 3318.7468 | NaN       | 7668.246   |
| sp O60684 IMA7_HUMAN  | 5111.9644 | NaN       | 7229.097   |
| sp Q14974 IMB1_HUMAN  | 13708.937 | 174.2385  | 4651.79    |
| sp P04264 K2C1_HUMAN  | 19755.799 | 21447.219 | 26267.514  |
| sp P13645 K1C10_HUMAN | 13303.007 | 21198.959 | 3349.4878  |
| sp P02533 K1C14_HUMAN | 2125.8096 | 4059.5815 | 4551.1406  |
| sp P08779 K1C16_HUMAN | 325.9308  | NaN       | 5710.9907  |
| sp P35908 K22E_HUMAN  | 10190.964 | 28864     | 5820.291   |
| sp Q15323 K1H1_HUMAN  | NaN       | 4103.278  | 2345.4182  |
| sp P13647 K2C5_HUMAN  | 2756.7158 | 3403.746  | 399.19064  |
| sp Q14CN4 K2C72_HUMAN | NaN       | 229.8373  | 8072.6245  |
| sp Q9NSB4 KRT82_HUMAN | NaN       | 940.68854 | 33155.668  |
| sp O43790 KRT86_HUMAN | NaN       | 3701.5334 | 6923.642   |
| sp P35527 K1C9_HUMAN  | 7168.2944 | 8474.555  | 15753.544  |
| sp Q8N6L1 KTAP2_HUMAN | 1162.5001 | NaN       | 10925.166  |
| sp Q86UP2 KTN1_HUMAN  | 4526.552  | NaN       | 5948.644   |
| sp Q16719 KYNU_HUMAN  | 4981.8213 | NaN       | 18277.092  |
| sp Q53H82 LACB2_HUMAN | 932.1478  | NaN       | 821.7811   |
| sp Q16363 LAMA4_HUMAN | 3850.5366 | NaN       | 9637.328   |

|                       |           |           |           |
|-----------------------|-----------|-----------|-----------|
| sp P07942 LAMB1_HUMAN | 7468.747  | NaN       | 320.7092  |
| sp P55268 LAMB2_HUMAN | 2305.4084 | NaN       | 8760.486  |
| sp P11047 LAMC1_HUMAN | 8133.0195 | 425.5916  | 7684.408  |
| sp P11279 LAMP1_HUMAN | 36363.176 | 7583.661  | 3187.0093 |
| sp P13473 LAMP2_HUMAN | 7056.071  | 460.94772 | 4269.9385 |
| sp Q6IAA8 LTOR1_HUMAN | 11738.867 | 322.0184  | 2279.437  |
| sp Q9Y2Q5 LTOR2_HUMAN | 4761.088  | NaN       | 12066.975 |
| sp Q9UHA4 LTOR3_HUMAN | 2788.2295 | NaN       | 5489.001  |
| sp Q0VGL1 LTOR4_HUMAN | NaN       | 166.23865 | 3315.997  |
| sp O43504 LTOR5_HUMAN | 6083.727  | NaN       | 4249.6265 |
| sp O43813 LANC1_HUMAN | 3257.922  | NaN       | 16947.03  |
| sp P28838 AMPL_HUMAN  | 10897.693 | NaN       | 7766.921  |
| sp Q15012 LAP4A_HUMAN | 3324.431  | NaN       | 8857.221  |
| sp Q86VI4 LAP4B_HUMAN | 321.57825 | NaN       | 7032.946  |
| sp Q71RC2 LARP4_HUMAN | 376.48392 | NaN       | 4916.1133 |
| sp Q9P2J5 SYLC_HUMAN  | 5556.3486 | NaN       | 687.86847 |
| sp Q14847 LASP1_HUMAN | 4733.379  | 807.7688  | 34552.25  |
| sp Q6UX15 LAYN_HUMAN  | 430.33163 | NaN       | 510.26596 |
| sp Q14739 LBR_HUMAN   | 1264.4138 | NaN       | 12938.104 |
| sp Q6UWP7 LCLT1_HUMAN | 1042.7769 | NaN       | 6635.0063 |
| sp Q9H6V9 LDAH_HUMAN  | 230.81941 | NaN       | 6028.184  |
| sp P00338 LDHA_HUMAN  | 51118.81  | 4351.181  | 51850.355 |
| sp P07195 LDHB_HUMAN  | 15955.721 | 2643.5059 | 1035.1936 |
| sp P01130 LDLR_HUMAN  | 11332.8   | NaN       | 4307.11   |
| sp Q8NC56 LEMD2_HUMAN | 1324.3497 | NaN       | 9036.489  |
| sp O15243 OBRG_HUMAN  | 1029.1394 | NaN       | 3083.84   |
| sp O95214 LERL1_HUMAN | 603.8969  | NaN       | 8464.488  |
| sp O95202 LETM1_HUMAN | 4171.335  | NaN       | 3911.058  |
| sp P09382 LEG1_HUMAN  | 108669.43 | 7964.879  | 1122.0933 |
| sp P17931 LEG3_HUMAN  | 11908.371 | NaN       | 9126.427  |
| sp Q08380 LG3BP_HUMAN | 3044.725  | NaN       | 419.56226 |
| sp O00214 LEG8_HUMAN  | 960.0856  | NaN       | 8325.881  |
| sp Q6ZUX7 LHPL2_HUMAN | 255.4429  | NaN       | 4143.623  |



|                       |           |           |           |
|-----------------------|-----------|-----------|-----------|
| sp Q9Y693 LHPL6_HUMAN | 1886.7191 | NaN       | 4447.6616 |
| sp Q9UHB6 LIMA1_HUMAN | 5517.3477 | NaN       | 7522.1445 |
| sp Q9UPQ0 LIMC1_HUMAN | 594.3289  | NaN       | 4814.312  |
| sp P48059 LIMS1_HUMAN | 6870.8535 | NaN       | 5931.223  |
| sp Q9NUP9 LIN7C_HUMAN | 1841.1843 | NaN       | 14597.992 |
| sp P38571 LICH_HUMAN  | 883.1759  | NaN       | 4673.6187 |
| sp Q99732 LITAF_HUMAN | 368.9717  | NaN       | 3104.1047 |
| sp Q15334 L2GL1_HUMAN | 1423.4908 | NaN       | 8288.591  |
| sp P49257 LMAN1_HUMAN | 39916.68  | 1819.6604 | 1466.9866 |
| sp Q12907 LMAN2_HUMAN | 20795.406 | 1569.1069 | 4951.263  |
| sp Q9H0V9 LMA2L_HUMAN | 4063.227  | NaN       | 8567.518  |
| sp Q9NUN5 LMBD1_HUMAN | 2292.152  | NaN       | 6968.5    |
| sp Q68DH5 LMBD2_HUMAN | 193.32922 | NaN       | 3532.3142 |
| sp Q96S06 LMF1_HUMAN  | 419.68115 | NaN       | 29127.09  |
| sp Q9BU23 LMF2_HUMAN  | 4429.629  | NaN       | 47137.336 |
| sp P02545 LMNA_HUMAN  | 19046.498 | 7462.8574 | 6065.7373 |
| sp P20700 LMNB1_HUMAN | 4374.2324 | NaN       | 6499.6274 |
| sp Q03252 LMNB2_HUMAN | 2396.6675 | NaN       | 4296.9478 |
| sp Q8WWI1 LMO7_HUMAN  | 1880.0963 | NaN       | 146.6569  |
| sp Q9UIQ6 LCAP_HUMAN  | 12710.13  | NaN       | 1370.0282 |
| sp Q9C0E8 LNP_HUMAN   | 1806.916  | NaN       | 6952.679  |
| sp P36776 LONM_HUMAN  | 2992.72   | 0         | 5502.382  |
| sp P28300 LYOX_HUMAN  | 2840.5562 | NaN       | 2732.5786 |
| sp Q9Y4K0 LOXL2_HUMAN | 2386.9421 | NaN       | 2486.9692 |
| sp Q92633 LPAR1_HUMAN | 10589.153 | 571.9678  | 5156.623  |
| sp Q8NF37 PCAT1_HUMAN | 761.584   | NaN       | 1313.1105 |
| sp Q7L5N7 PCAT2_HUMAN | 743.28723 | NaN       | 1515.45   |
| sp Q6P1A2 MBOA5_HUMAN | 942.9702  | NaN       | 3873.2112 |
| sp Q93052 LPP_HUMAN   | 993.8959  | NaN       | 2333.9343 |
| sp P50851 LRBA_HUMAN  | 837.75006 | NaN       | 4101.4297 |
| sp Q96I18 LRCH3_HUMAN | 298.78284 | NaN       | 6872.1006 |
| sp O75427 LRCH4_HUMAN | 2070.824  | NaN       | 219.67438 |
| sp Q07954 LRP1_HUMAN  | 24227.143 | 997.4481  | 757.3826  |

|                       |           |           |           |
|-----------------------|-----------|-----------|-----------|
| sp Q7Z4F1 LRP10_HUMAN | 4153.4487 | NaN       | 3205.6658 |
| sp P30533 AMRP_HUMAN  | 8067.3945 | NaN       | 3515.2703 |
| sp P42704 LPPRC_HUMAN | 32424.18  | 217.96658 | 6242.2783 |
| sp Q8TF66 LRC15_HUMAN | 316.34903 | NaN       | 10294.657 |
| sp Q9H9A6 LRC40_HUMAN | 605.4955  | NaN       | 5554.799  |
| sp Q8N1G4 LRC47_HUMAN | 2453.0107 | NaN       | 5738.4785 |
| sp Q96AG4 LRC59_HUMAN | 11431.264 | 313.13275 | 3511.1257 |
| sp Q8IWT6 LRC8A_HUMAN | 6303.6416 | NaN       | 7039.5605 |
| sp Q8TDW0 LRC8C_HUMAN | 18395.406 | NaN       | 4356.9297 |
| sp Q7L1W4 LRC8D_HUMAN | 1046.909  | NaN       | 11079.565 |
| sp Q13449 LSAMP_HUMAN | 144.50528 | NaN       | 5499.9487 |
| sp O15116 LSM1_HUMAN  | 504.03278 | NaN       | 4408.4097 |
| sp Q3MHD2 LSM12_HUMAN | 445.25916 | NaN       | 14136.002 |
| sp Q9Y333 LSM2_HUMAN  | 1341.9244 | NaN       | 10604.09  |
| sp Q9Y4Y9 LSM5_HUMAN  | 992.4678  | NaN       | 6180.8467 |
| sp P62312 LSM6_HUMAN  | 325.9065  | NaN       | 11881.784 |
| sp O95777 LSM8_HUMAN  | 761.4867  | NaN       | 914.4884  |
| sp P48449 LSS_HUMAN   | 6141.914  | 1145.121  | 48087.855 |
| sp P09960 LKHA4_HUMAN | 8186.078  | NaN       | 856.8127  |
| sp P36941 TNR3_HUMAN  | 249.5059  | NaN       | 5805.1636 |
| sp P02788 TRFL_HUMAN  | 97378.52  | 48169.902 | 4089.9072 |
| sp P51884 LUM_HUMAN   | 4640.7837 | 1224.6158 | 1551.5112 |
| sp P07948 LYN_HUMAN   | 852.46484 | NaN       | 7339.86   |
| sp O75608 LYPA1_HUMAN | 643.19763 | NaN       | 607.38873 |
| sp O95372 LYPA2_HUMAN | 428.72644 | NaN       | 876.4626  |
| sp P20645 MPRD_HUMAN  | 9480.553  | NaN       | 1340.947  |
| sp Q9UPN3 MACF1_HUMAN | 949.96423 | NaN       | 271.82828 |
| sp Q9BQ69 MACD1_HUMAN | 13986.477 | NaN       | 53294.367 |
| sp O75367 H2AY_HUMAN  | 2413.8843 | NaN       | 2871.4436 |
| sp Q9P0M6 H2AW_HUMAN  | 1033.5466 | NaN       | 5612.6953 |
| sp Q13257 MD2L1_HUMAN | 523.19604 | NaN       | 10711.401 |
| sp Q9UNF1 MAGD2_HUMAN | 1132.4948 | NaN       | 4929.6055 |
| sp P61326 MGN_HUMAN   | 215.96051 | NaN       | 2556.4062 |

|                        |           |           |           |
|------------------------|-----------|-----------|-----------|
| sp Q9H0U3 MAGT1_HUMAN  | 3631.2346 | NaN       | 7212.5986 |
| sp Q9BXY0 MAK16_HUMAN  | 162.1004  | 104.34522 | 986.68396 |
| sp P33908 MA1A1_HUMAN  | 0         | NaN       | 3519.435  |
| sp Q9UKM7 MA1B1_HUMAN  | 329.8115  | NaN       | 3383.9236 |
| sp Q16706 MA2A1_HUMAN  | 5008.75   | NaN       | 7621.0166 |
| sp O00754 MA2B1_HUMAN  | 1855.2234 | NaN       | 4164.9814 |
| sp P55145 MANF_HUMAN   | 8627.989  | 426.41635 | 1596.6523 |
| sp P78559 MAP1A_HUMAN  | 5670.24   | NaN       | 3943.76   |
| sp P46821 MAP1B_HUMAN  | 6508.194  | NaN       | 4730.7266 |
| sp Q9H492 MLP3A_HUMAN  | 1712.8043 | NaN       | 16605.93  |
| sp A6NCE7 MP3B2_HUMAN  | 4789.6885 | NaN       | 796.9177  |
| sp Q66K74 MAP1S_HUMAN  | 599.43835 | NaN       | 4750.422  |
| sp Q02750 MP2K1_HUMAN  | 2204.6362 | NaN       | 11597.182 |
| sp P36507 MP2K2_HUMAN  | 2552.7573 | 0         | 15437.786 |
| sp P46734 MP2K3_HUMAN  | 996.08203 | NaN       | 4043.3906 |
| sp P27816 MAP4_HUMAN   | 3640.8584 | 243.77003 | 395.97015 |
| sp O95819 M4K4_HUMAN   | 2106.0457 | NaN       | 233.94086 |
| sp P28482 MK01_HUMAN   | 5176.881  | NaN       | 2621.9167 |
| sp Q16539 MK14_HUMAN   | 223.81525 | NaN       | 235.3116  |
| sp Q8NDC0 MISSL_HUMAN  | 380.2922  | NaN       | 1794.634  |
| sp P27361 MK03_HUMAN   | 4557.9307 | NaN       | 7882.9404 |
| sp P49137 MAPK2_HUMAN  | 5868.8784 | NaN       | 929.12396 |
| sp Q15691 MARE1_HUMAN  | 4739.743  | NaN       | 16985.87  |
| sp Q15555 MARE2_HUMAN  | 965.3464  | NaN       | 629.6233  |
| sp Q9NX47 MAREH5_HUMAN | 233.02243 | NaN       | 348.67    |
| sp P29966 MARCS_HUMAN  | 19183.225 | 1338.7651 | 8419.968  |
| sp P49006 MRP_HUMAN    | 2520.0605 | NaN       | 322.89767 |
| sp P56192 SYMC_HUMAN   | 5453.6733 | NaN       | 2766.6697 |
| sp P48740 MASP1_HUMAN  | 1461.2664 | NaN       | 3279.9202 |
| sp P31153 METK2_HUMAN  | 6063.038  | NaN       | 3128.743  |
| sp Q9NZL9 MAT2B_HUMAN  | 145.5478  | NaN       | 6440.5605 |
| sp P43243 MATR3_HUMAN  | 4055.5112 | NaN       | 3276.3254 |
| sp Q68D91 MBLC2_HUMAN  | 3635.1182 | NaN       | 12775.599 |

|                       |           |           |           |
|-----------------------|-----------|-----------|-----------|
| sp Q5VZF2 MBNL2_HUMAN | 543.4685  | NaN       | 55.102913 |
| sp Q96N66 MBOA7_HUMAN | 3548.4465 | 1015.1242 | 1071.2393 |
| sp P43121 MUC18_HUMAN | 4255.719  | NaN       | 490.66916 |
| sp Q9HCC0 MCCB_HUMAN  | 2074.7812 | NaN       | 417.82675 |
| sp Q8NI22 MCFD2_HUMAN | 3282.4875 | NaN       | 11394.979 |
| sp P49736 MCM2_HUMAN  | 5699.998  | NaN       | 3689.1682 |
| sp P25205 MCM3_HUMAN  | 3064.32   | NaN       | 2458.299  |
| sp P33991 MCM4_HUMAN  | 3706.664  | NaN       | 1922.3486 |
| sp P33992 MCM5_HUMAN  | 4302.5444 | NaN       | 1054.2468 |
| sp Q14566 MCM6_HUMAN  | 3059.1846 | NaN       | 9226.202  |
| sp P33993 MCM7_HUMAN  | 3062.8796 | NaN       | 327.1622  |
| sp Q9GZU1 MCLN1_HUMAN | 914.68494 | NaN       | 2545.617  |
| sp Q9ULC4 MCTS1_HUMAN | 2837.636  | NaN       | 1935.821  |
| sp Q8NE86 MCU_HUMAN   | 4046.2104 | NaN       | 7150.565  |
| sp Q96AQ8 MCUR1_HUMAN | 468.62927 | NaN       | 13533.775 |
| sp P40925 MDHC_HUMAN  | 13108.805 | 756.2724  | 8989.71   |
| sp P40926 MDHM_HUMAN  | 37696.574 | 7706.5576 | 10658.039 |
| sp P48163 MAOX_HUMAN  | 2760.737  | NaN       | 399.89398 |
| sp P23368 MAOM_HUMAN  | 3698.112  | NaN       | 5673.113  |
| sp Q6P9B6 MEAK7_HUMAN | 1447.1344 | NaN       | 1455.8293 |
| sp Q9Y316 MEMO1_HUMAN | 819.9055  | NaN       | 23742.873 |
| sp Q14696 MESD_HUMAN  | 6230.518  | NaN       | 5060.621  |
| sp P53582 MAP11_HUMAN | 1578.2177 | NaN       | 16367.628 |
| sp P50579 MAP2_HUMAN  | 1089.246  | NaN       | 1275.7131 |
| sp Q9H8H3 MET7A_HUMAN | 4882.888  | NaN       | 4157.9004 |
| sp Q9GZY8 MFF_HUMAN   | 585.1185  | NaN       | 5545.7983 |
| sp Q08431 MFGM_HUMAN  | 16646.53  | 3906.0327 | 2621.4988 |
| sp Q9H3U5 MFSD1_HUMAN | 762.11865 | NaN       | 4665.285  |
| sp Q14728 MFS10_HUMAN | 6919.4365 | NaN       | 2573.8267 |
| sp Q6NUT3 MFS12_HUMAN | 331.0409  | NaN       | 50412.016 |
| sp Q6N075 MFSD5_HUMAN | 778.2522  | NaN       | 6870.102  |
| sp P26572 MGAT1_HUMAN | 1441.5269 | NaN       | 4920.4766 |
| sp Q10469 MGAT2_HUMAN | 6903.4893 | NaN       | 1787.4584 |

|                       |           |           |           |
|-----------------------|-----------|-----------|-----------|
| sp Q99685 MGLL_HUMAN  | 4679.4473 | NaN       | 26603.348 |
| sp O60291 MGRN1_HUMAN | 344.48016 | NaN       | 14480.162 |
| sp P10620 MGST1_HUMAN | 9992.866  | 830.58154 | 9313.373  |
| sp O14880 MGST3_HUMAN | 5571.9214 | 1122.6349 | 5257.691  |
| sp Q8TDZ2 MICA1_HUMAN | 1277.8486 | NaN       | 630.04395 |
| sp O94851 MICA2_HUMAN | 549.37134 | NaN       | 1928.6521 |
| sp Q5XKP0 MIC13_HUMAN | 227.18994 | NaN       | 28.645777 |
| sp O15344 TRI18_HUMAN | 2260.0205 | NaN       | 2816.7937 |
| sp P14174 MIF_HUMAN   | 7330.991  | 177.68683 | 4540.834  |
| sp Q9UNW1 MINP1_HUMAN | 6912.6255 | NaN       | 1144.3641 |
| sp Q14165 MLEC_HUMAN  | 4303.477  | 297.57013 | 8168.832  |
| sp Q96EY8 MMAB_HUMAN  | 1595.0764 | NaN       | 600.70544 |
| sp P08473 NEP_HUMAN   | 67937.336 | 7068.989  | 5825.348  |
| sp P50281 MMP14_HUMAN | 21366.352 | 2675.484  | 262.41702 |
| sp P08253 MMP2_HUMAN  | 6343.4385 | 958.8767  | 2749.813  |
| sp Q96T76 MMS19_HUMAN | 1222.1774 | NaN       | 4864.307  |
| sp P22033 MUTA_HUMAN  | 2364.3281 | NaN       | 10133.563 |
| sp Q7L9L4 MOB1B_HUMAN | 781.16724 | NaN       | 5669.4517 |
| sp Q9Y3A3 PHOCN_HUMAN | 880.1413  | NaN       | 7571.6055 |
| sp Q13724 MOGS_HUMAN  | 7088.4556 | NaN       | 6630.6597 |
| sp Q8NHP6 MSPD2_HUMAN | 255.169   | NaN       | 15582.613 |
| sp Q6UVY6 MOXD1_HUMAN | 1347.045  | NaN       | 8532.6455 |
| sp O95563 MPC2_HUMAN  | 226.99504 | NaN       | 8257.952  |
| sp O75352 MPU1_HUMAN  | 3271.518  | 348.28586 | 6544.007  |
| sp Q6WCQ1 MPRIP_HUMAN | 715.8619  | NaN       | 21515.094 |
| sp P39210 MPV17_HUMAN | 783.9773  | NaN       | 12400.722 |
| sp O95297 MPZL1_HUMAN | 7544.2764 | NaN       | 28919.1   |
| sp O14807 RASM_HUMAN  | 738.59766 | NaN       | 27282.082 |
| sp Q9UBG0 MRC2_HUMAN  | 6249.6904 | NaN       | 39065.12  |
| sp Q96AM1 MRGRF_HUMAN | 4413.9824 | NaN       | 4880.9106 |
| sp Q8NDA8 MROH1_HUMAN | 294.54718 | NaN       | 9480.962  |
| sp Q7Z7H8 RM10_HUMAN  | 448.3198  | NaN       | 20284.334 |
| sp Q9Y3B7 RM11_HUMAN  | 697.24646 | NaN       | 5487.6714 |

|                       |           |           |           |
|-----------------------|-----------|-----------|-----------|
| sp P52815 RM12_HUMAN  | 1324.6364 | NaN       | 29099.094 |
| sp Q9BYD1 RM13_HUMAN  | 19444.002 | NaN       | 13356.521 |
| sp Q9H0U6 RM18_HUMAN  | 2336.8047 | NaN       | 12355.852 |
| sp Q9BYD3 RM04_HUMAN  | 610.0646  | NaN       | 3902.8083 |
| sp Q9H9J2 RM44_HUMAN  | 2177.2273 | NaN       | 21328.6   |
| sp Q13405 RM49_HUMAN  | 189.67831 | NaN       | 10064.46  |
| sp P82664 RT10_HUMAN  | 264.16342 | NaN       | 4879.4004 |
| sp Q9Y3D3 RT16_HUMAN  | 418.06964 | NaN       | 3927.3225 |
| sp P82650 RT22_HUMAN  | 1240.9011 | NaN       | 14704.967 |
| sp P82663 RT25_HUMAN  | 178.02483 | NaN       | 11604.287 |
| sp Q9BYN8 RT26_HUMAN  | 696.476   | NaN       | 2556.5098 |
| sp Q92552 RT27_HUMAN  | 2209.4248 | NaN       | 13411.312 |
| sp Q92665 RT31_HUMAN  | 1323.2743 | NaN       | 6051.325  |
| sp P82909 KGD4_HUMAN  | 1244.0398 | NaN       | 8505.723  |
| sp Q9Y2R9 RT07_HUMAN  | 1895.9814 | NaN       | 18882.955 |
| sp P82933 RT09_HUMAN  | 28284.354 | NaN       | 17534.791 |
| sp Q15800 MSMO1_HUMAN | 5556.4956 | NaN       | 8964.795  |
| sp P26038 MOES_HUMAN  | 6522.075  | 2587.046  | 17585.107 |
| sp Q9UJ68 MSRA_HUMAN  | 2470.7168 | NaN       | 15704.391 |
| sp P26927 HGFL_HUMAN  | 1024.8638 | NaN       | 17524.14  |
| sp P02795 MT2_HUMAN M | 19850.014 | 2578.6787 | 2472.2202 |
| sp Q13126 MTAP_HUMAN  | 1543.9419 | NaN       | 343.68497 |
| sp P00846 ATP6_HUMAN  | 2507.3115 | NaN       | 792.0221  |
| sp P03928 ATP8_HUMAN  | 2764.2344 | NaN       | 3514.2385 |
| sp Q9NZJ7 MTCH1_HUMAN | 3813.805  | NaN       | 2888.1716 |
| sp Q9Y6C9 MTCH2_HUMAN | 11289.398 | 274.49448 | 8462.577  |
| sp P00395 COX1_HUMAN  | 1069.8307 | NaN       | 1707.9751 |
| sp P00403 COX2_HUMAN  | 8139.451  | NaN       | 4539.9287 |
| sp P00414 COX3_HUMAN  | 1401.094  | NaN       | 7106.9517 |
| sp Q86UE4 LYRIC_HUMAN | 2483.726  | NaN       | 10050.622 |
| sp P11586 C1TC_HUMAN  | 9782.75   | NaN       | 19787.14  |
| sp Q13614 MTMR2_HUMAN | 1720.2722 | NaN       | 4411.1064 |
| sp P03886 NU1M_HUMAN  | 298.33234 | NaN       | 8427.813  |

|                       |           |           |            |
|-----------------------|-----------|-----------|------------|
| sp P03905 NU4M_HUMAN  | 628.0713  | NaN       | 8529.633   |
| sp P03915 NU5M_HUMAN  | 2163.9531 | NaN       | 14763.446  |
| sp P42345 MTOR_HUMAN  | 2649.005  | NaN       | 4793.7056  |
| sp P58546 MTPN_HUMAN  | 1489.995  | 378.4767  | 1945.6927  |
| sp Q13505 MTX1_HUMAN  | 1469.863  | NaN       | 13583.0625 |
| sp O75431 MTX2_HUMAN  | 713.5477  | NaN       | 1041.6836  |
| sp P53602 MVD1_HUMAN  | 1537.7048 | NaN       | 5413.244   |
| sp Q03426 KIME_HUMAN  | 4556.3    | NaN       | 8165.7725  |
| sp Q14764 MVP_HUMAN M | 35736.28  | 4024.456  | 5300.0127  |
| sp P84157 MXRA7_HUMAN | 632.63574 | NaN       | 8885.048   |
| sp Q9BRK3 MXRA8_HUMAN | 7396.6694 | 273.41144 | 641.1227   |
| sp Q96S97 MYADM_HUMAN | 9145.855  | 252.48    | 5326.197   |
| sp Q99836 MYD88_HUMAN | 640.61487 | NaN       | 27771.94   |
| sp Q969H8 MYDGF_HUMAN | 12178.994 | 801.49    | 3738.0251  |
| sp Q9HB07 MYG1_HUMAN  | 4376.949  | NaN       | 24787.338  |
| sp P35580 MYH10_HUMAN | 74722.42  | 4466.339  | 11025.731  |
| sp Q7Z406 MYH14_HUMAN | 2949.563  | NaN       | 840.86664  |
| sp P35579 MYH9_HUMAN  | 111355.78 | 7242.531  | 5452.7417  |
| sp O14950 ML12B_HUMAN | 40848.23  | 3734.5378 | 35231.203  |
| sp P60660 MYL6_HUMAN  | 85910.414 | 5854.908  | 2701.0151  |
| sp P24844 MYL9_HUMAN  | 5925.256  | NaN       | 10894.665  |
| sp Q15746 MYLK_HUMAN  | 7596.0347 | NaN       | 6536.5117  |
| sp Q9HD67 MYO10_HUMAN | 918.123   | NaN       | 13637.774  |
| sp Q92614 MY18A_HUMAN | 1746.6901 | NaN       | 3948.031   |
| sp O43795 MYO1B_HUMAN | 17171.459 | NaN       | 103510.75  |
| sp O00159 MYO1C_HUMAN | 43561.47  | NaN       | 2530.4153  |
| sp Q12965 MYO1E_HUMAN | 2127.3264 | NaN       | 11357.131  |
| sp Q9Y4I1 MYO5A_HUMAN | 770.3284  | NaN       | 6675.628   |
| sp Q9UM54 MYO6_HUMAN  | 9678.438  | NaN       | 17991.055  |
| sp Q13459 MYO9B_HUMAN | 822.6033  | NaN       | 5941.4634  |
| sp Q9NZM1 MYOF_HUMAN  | 28999.898 | 5807.179  | 4440.4175  |
| sp Q08AG7 MZT1_HUMAN  | 470.9762  | NaN       | 6850.6665  |
| sp P41227 NAA10_HUMAN | 454.39612 | NaN       | 6691.427   |

|                       |           |           |           |
|-----------------------|-----------|-----------|-----------|
| sp Q9BXJ9 NAA15_HUMAN | 6945.328  | NaN       | 8635.428  |
| sp Q5VZE5 NAA35_HUMAN | NaN       | 81.43106  | 10023.04  |
| sp Q9GZZ1 NAA50_HUMAN | 463.6303  | NaN       | 1556.7579 |
| sp E9PAV3 NACAM_HUMAN | 6787.738  | 3969.261  | 14020.477 |
| sp Q13564 ULA1_HUMAN  | 276.68    | NaN       | 5699.9697 |
| sp Q9UJ70 NAGK_HUMAN  | 5268.407  | 260.0416  | 19226.543 |
| sp P54802 ANAG_HUMAN  | 224.77899 | NaN       | 5935.5684 |
| sp Q9UK23 NAGPA_HUMAN | 434.3427  | NaN       | 11523.8   |
| sp P43490 NAMPT_HUMAN | 9699.596  | NaN       | 31628.008 |
| sp P0DOX8 IGL1_HUMAN  | 2135.599  | 1091.0444 | 2274.9019 |
| sp Q9NR45 SIAS_HUMAN  | 4203.2827 | NaN       | 2205.739  |
| sp P55209 NP1L1_HUMAN | 8877.851  | NaN       | 2664.05   |
| sp Q99733 NP1L4_HUMAN | 10796.924 | NaN       | 7487.9404 |
| sp P54920 SNAA_HUMAN  | 10193.105 | NaN       | 706.39374 |
| sp Q99747 SNAG_HUMAN  | 2575.4495 | NaN       | 12903.637 |
| sp O43776 SYNC_HUMAN  | 57533.09  | NaN       | 13698.283 |
| sp P49321 NASP_HUMAN  | 443.30765 | NaN       | 230.16022 |
| sp Q8WUY8 NAT14_HUMAN | 1500.8806 | NaN       | 2825.0242 |
| sp A2RRP1 NBAS_HUMAN  | 5853.801  | NaN       | 5446.5933 |
| sp Q9H094 NBPF3_HUMAN | NaN       | 0         | 238.56667 |
| sp Q14596 NBR1_HUMAN  | 3283.5232 | NaN       | 12474.41  |
| sp P13591 NCAM1_HUMAN | 3502.484  | NaN       | 645.115   |
| sp Q15021 CND1_HUMAN  | 6730.9683 | NaN       | 1444.7859 |
| sp Q9BPX3 CND3_HUMAN  | 4158.9883 | NaN       | 4485.5684 |
| sp Q15003 CND2_HUMAN  | 8006.873  | NaN       | 13856.705 |
| sp Q6PIU2 NCEH1_HUMAN | 8169.476  | 359.57156 | 4354.1406 |
| sp P16333 NCK1_HUMAN  | 18299.273 | NaN       | 12183.978 |
| sp Q9Y2A7 NCKP1_HUMAN | 8857.348  | NaN       | 18889.828 |
| sp P19338 NUCL_HUMAN  | 2861.679  | 230.28746 | 7825.9824 |
| sp Q969V3 NCLN_HUMAN  | 12474.34  | NaN       | 10373.187 |
| sp Q13772 NCOA4_HUMAN | 6385.131  | NaN       | 2675.2908 |
| sp P62166 NCS1_HUMAN  | 1688.7683 | NaN       | 11055.492 |
| sp Q92542 NICA_HUMAN  | 6051.2563 | 700.7676  | 8522.31   |



|                       |           |           |           |
|-----------------------|-----------|-----------|-----------|
| sp Q9BT67 NFIP1_HUMAN | 5121.4673 | NaN       | 7220.688  |
| sp Q9NV92 NFIP2_HUMAN | 406.83737 | NaN       | 7590.0483 |
| sp Q92597 NDRG1_HUMAN | 5205.8633 | NaN       | 4397.1226 |
| sp Q9UGV2 NDRG3_HUMAN | 2872.5835 | NaN       | 15237.377 |
| sp P52848 NDST1_HUMAN | 680.8065  | NaN       | 3281.7349 |
| sp O95299 NDUAA_HUMAN | 10093.442 | NaN       | 6176.2446 |
| sp Q86Y39 NDUAB_HUMAN | 2936.1826 | NaN       | 4359.8374 |
| sp Q9UI09 NDUAC_HUMAN | 996.95264 | NaN       | 3259.6184 |
| sp Q9P0J0 NDUAD_HUMAN | 10255.572 | NaN       | 994.4369  |
| sp O43678 NDUA2_HUMAN | 1780.2032 | NaN       | 268.51    |
| sp O95167 NDUA3_HUMAN | 711.0925  | NaN       | 2629.4368 |
| sp O00483 NDUA4_HUMAN | 2004.5236 | 291.9026  | 134.93488 |
| sp Q16718 NDUA5_HUMAN | 4386.1494 | NaN       | 39274.586 |
| sp P56556 NDUA6_HUMAN | 926.7738  | NaN       | 1658.7727 |
| sp O95182 NDUA7_HUMAN | 909.56525 | NaN       | 3166.0186 |
| sp P51970 NDUA8_HUMAN | 1896.8916 | NaN       | 1870.6644 |
| sp Q16795 NDUA9_HUMAN | 2549.306  | NaN       | 3544.0505 |
| sp O14561 ACPM_HUMAN  | 5157.2524 | NaN       | 3793.6743 |
| sp Q9P032 NDUF4_HUMAN | 1122.9333 | NaN       | 2374.3777 |
| sp O75438 NDUB1_HUMAN | 250.79926 | NaN       | 4369.421  |
| sp O96000 NDUBA_HUMAN | 3061.5125 | 653.45856 | 10280.136 |
| sp Q9NX14 NDUBB_HUMAN | 983.8644  | NaN       | 9293.926  |
| sp O43676 NDUB3_HUMAN | 2044.7349 | 299.80374 | 4179.7607 |
| sp O95168 NDUB4_HUMAN | 3417.8755 | 157.4602  | 2599.0261 |
| sp O43674 NDUB5_HUMAN | 1323.1318 | NaN       | 2461.8367 |
| sp O95139 NDUB6_HUMAN | 299.36462 | NaN       | 2782.1868 |
| sp P17568 NDUB7_HUMAN | 1809.6193 | NaN       | 4902.8457 |
| sp O95169 NDUB8_HUMAN | 621.62524 | NaN       | 13769.824 |
| sp Q9Y6M9 NDUB9_HUMAN | 4829.7227 | NaN       | 349.7179  |
| sp O95298 NDUC2_HUMAN | 561.3982  | NaN       | 1544.9618 |
| sp P28331 NDUS1_HUMAN | 5695.1914 | NaN       | 23790.473 |
| sp O75306 NDUS2_HUMAN | 7492.6123 | NaN       | 8837.287  |
| sp O75489 NDUS3_HUMAN | 6028.3525 | NaN       | 10117.067 |

|                       |           |           |           |
|-----------------------|-----------|-----------|-----------|
| sp O43181 NDUS4_HUMAN | 716.00525 | NaN       | 2548.7437 |
| sp O43920 NDUS5_HUMAN | 1901.3345 | NaN       | 1541.3398 |
| sp O75380 NDUS6_HUMAN | 729.82434 | NaN       | 3003.9463 |
| sp O75251 NDUS7_HUMAN | 2158.1917 | NaN       | 1268.7002 |
| sp O00217 NDUS8_HUMAN | 1772.5715 | NaN       | 6430.8193 |
| sp P49821 NDUV1_HUMAN | 7114.078  | NaN       | 4265.7393 |
| sp P19404 NDUV2_HUMAN | 7855.2017 | NaN       | 11642.414 |
| sp Q92692 NECT2_HUMAN | 5612.326  | NaN       | 2404.3506 |
| sp Q9NQS3 NECT3_HUMAN | 3550.8462 | NaN       | 1693.7267 |
| sp P46934 NEDD4_HUMAN | 1567.3378 | NaN       | 5472.4727 |
| sp Q96PU5 NED4L_HUMAN | 349.02347 | NaN       | 26177.963 |
| sp Q15843 NEDD8_HUMAN | 2422.3352 | NaN       | 8353.798  |
| sp Q8TD19 NEK9_HUMAN  | 986.617   | NaN       | 6213.562  |
| sp Q9UMX5 NENF_HUMAN  | 14895.263 | NaN       | 4368.419  |
| sp Q92859 NEO1_HUMAN  | 129.34578 | NaN       | 618.2501  |
| sp P48681 NEST_HUMAN  | 7017.1743 | NaN       | 395.0149  |
| sp P21359 NF1_HUMAN   | 580.72095 | NaN       | 2488.072  |
| sp O94856 NFASC_HUMAN | 1055.3723 | NaN       | 8306.933  |
| sp Q9UMS0 NFU1_HUMAN  | 1274.0835 | NaN       | 2238.61   |
| sp Q9NX24 NHP2_HUMAN  | 336.71277 | NaN       | 23552.877 |
| sp Q9BZQ8 NIBA1_HUMAN | 1623.5232 | NaN       | 458.89572 |
| sp Q96TA1 NIBA2_HUMAN | 9057.295  | NaN       | 19835.717 |
| sp P14543 NID1_HUMAN  | 711.61566 | NaN       | 8615.139  |
| sp Q9GZT8 NIF3L_HUMAN | 1428.4331 | NaN       | 14532.043 |
| sp Q92982 NINJ1_HUMAN | 2406.78   | NaN       | 13035.65  |
| sp Q9BPW8 NIPS1_HUMAN | 2553.3467 | NaN       | 4739.8774 |
| sp O75323 NIPS2_HUMAN | 1073.3757 | NaN       | 10018.1   |
| sp Q9UFN0 NPS3A_HUMAN | 2113.993  | NaN       | 61824.188 |
| sp Q9NQR4 NIT2_HUMAN  | 3915.8538 | NaN       | 6408.8364 |
| sp Q9BYT8 NEUL_HUMAN  | 875.1463  | NaN       | 7392.236  |
| sp P15531 NDKA_HUMAN  | 23631.562 | 3300.369  | 2202.0842 |
| sp O60361 NDK8_HUMAN  | 20050.135 | 868.15656 | 3131.9897 |
| sp Q13232 NDK3_HUMAN  | 519.6784  | NaN       | 3778.147  |

|                       |           |           |           |
|-----------------------|-----------|-----------|-----------|
| sp P30419 NMT1_HUMAN  | 1868.6052 | NaN       | 3752.561  |
| sp O60551 NMT2_HUMAN  | 483.56314 | NaN       | 5618.951  |
| sp P40261 NNMT_HUMAN  | 4757.18   | NaN       | 1773.8405 |
| sp Q13423 NNTM_HUMAN  | 30781.395 | 0         | 2591.1404 |
| sp O60936 NOL3_HUMAN  | 0         | NaN       | 3070.873  |
| sp P69849 NOMO3_HUMAN | 12226.843 | 319.2032  | 2055.3108 |
| sp Q15233 NONO_HUMAN  | 8832.551  | NaN       | 6225.3105 |
| sp Q9NPE3 NOP10_HUMAN | 721.7095  | NaN       | 8946.291  |
| sp O00567 NOP56_HUMAN | 3467.4683 | NaN       | 5073.106  |
| sp Q9Y2X3 NOP58_HUMAN | 884.4745  | NaN       | 17388.857 |
| sp Q04721 NOTC2_HUMAN | 6271.835  | NaN       | 1173.2739 |
| sp O15118 NPC1_HUMAN  | 35480.08  | 4365.663  | 13460.211 |
| sp P61916 NPC2_HUMAN  | 4642.6885 | 2928.4065 | 7993.334  |
| sp P55786 PSA_HUMAN   | 5319.476  | 274.6107  | 6984.9893 |
| sp Q8TAT6 NPL4_HUMAN  | 1459.8176 | NaN       | 4928.1055 |
| sp P06748 NPM_HUMAN   | 5025.9756 | 1030.1204 | 4267.2    |
| sp O75607 NPM3_HUMAN  | 277.0274  | NaN       | 2168.5132 |
| sp P20594 ANPRB_HUMAN | 1061.589  | NaN       | 1710.8973 |
| sp Q9Y639 NPTN_HUMAN  | 9273.162  | 0         | 8950.103  |
| sp P15559 NQO1_HUMAN  | 11658.926 | 228.30746 | 3081.5635 |
| sp P01111 RASN_HUMAN  | 2985.0037 | NaN       | 4110.319  |
| sp Q9UHY1 NRBP_HUMAN  | 1090.1339 | NaN       | 8012.9736 |
| sp O43847 NRDC_HUMAN  | 2294.0178 | NaN       | 15373.696 |
| sp O14786 NRP1_HUMAN  | 8746.583  | NaN       | 11773.1   |
| sp O60462 NRP2_HUMAN  | 11470.941 | NaN       | 32867.3   |
| sp Q15738 NSDHL_HUMAN | 5516.8765 | 404.13528 | 30355.582 |
| sp P46459 NSF_HUMAN   | 10166.236 | NaN       | 838.25446 |
| sp Q9UNZ2 NSF1C_HUMAN | 2227.02   | NaN       | 715.44946 |
| sp P49902 5NTC_HUMAN  | 1274.9777 | NaN       | 3221.348  |
| sp Q9H857 NT5D2_HUMAN | 162.35474 | NaN       | 1761.0901 |
| sp Q86UY8 NT5D3_HUMAN | 524.4313  | NaN       | 4050.435  |
| sp P21589 5NTD_HUMAN  | 48310.883 | 6761.2344 | 2163.8027 |
| sp Q9P121 NTRI_HUMAN  | 1180.3605 | NaN       | 7242.7544 |

|                       |           |           |           |
|-----------------------|-----------|-----------|-----------|
| sp Q9BV86 NTM1A_HUMAN | 2529.9692 | NaN       | 8555.775  |
| sp Q9BSD7 NTPCR_HUMAN | 399.0525  | NaN       | 4183.3315 |
| sp P53384 NUBP1_HUMAN | 1568.9838 | NaN       | 4140.8096 |
| sp Q9Y5Y2 NUBP2_HUMAN | 636.8865  | NaN       | 8910.291  |
| sp Q02818 NUCB1_HUMAN | 9155.277  | NaN       | 3151.4102 |
| sp P80303 NUCB2_HUMAN | 6992.291  | NaN       | 7104.221  |
| sp Q9H1E3 NUCKS_HUMAN | 258.68216 | NaN       | 65.17099  |
| sp Q9Y266 NUDC_HUMAN  | 5385.44   | NaN       | 958.0747  |
| sp Q8WVJ2 NUDC2_HUMAN | 996.7594  | NaN       | 6579.672  |
| sp P36639 8ODP_HUMAN  | 1295.4065 | NaN       | 4049.1145 |
| sp P50583 AP4A_HUMAN  | 1401.2212 | NaN       | 680.6839  |
| sp Q9UKK9 NUDT5_HUMAN | 2832.262  | NaN       | 2365.0603 |
| sp P49757 NUMB_HUMAN  | 327.26514 | NaN       | 1460.7778 |
| sp P57740 NU107_HUMAN | 165.22437 | NaN       | 4568.4307 |
| sp Q8WUM0 NU133_HUMAN | 777.51154 | NaN       | 965.07745 |
| sp O75694 NU155_HUMAN | 3598.3281 | NaN       | 574.34955 |
| sp Q92621 NU205_HUMAN | 1345.8005 | NaN       | 7686.4355 |
| sp Q8NFH3 NUP43_HUMAN | 505.04037 | NaN       | 2997.5503 |
| sp P37198 NUP62_HUMAN | 3906.9395 | NaN       | 5512.8364 |
| sp Q9BW27 NUP85_HUMAN | 1031.1458 | NaN       | 14457.878 |
| sp Q8N1F7 NUP93_HUMAN | 2478.0225 | NaN       | NaN       |
| sp P52948 NUP98_HUMAN | 248.3824  | NaN       | NaN       |
| sp P61970 NTF2_HUMAN  | 2683.397  | NaN       | NaN       |
| sp Q6DKJ4 NXN_HUMAN   | 3393.1099 | NaN       | 5787.802  |
| sp P29728 OAS2_HUMAN  | 1204.5428 | NaN       | 2482.503  |
| sp Q9Y6K5 OAS3_HUMAN  | 0         | NaN       | 6195.8306 |
| sp P04181 OAT_HUMAN   | 7679.3965 | 1280.0099 | 8070.985  |
| sp Q8TAD7 OCC1_HUMAN  | 3390.3833 | NaN       | 4633.79   |
| sp Q9NX40 OCAD1_HUMAN | 3061.326  | NaN       | 6356.8677 |
| sp Q56VL3 OCAD2_HUMAN | 1701.6315 | NaN       | 11656.572 |
| sp Q96M63 ODAD1_HUMAN | 12617.863 | 943.62823 | 852.1336  |
| sp Q5SWX8 ODR4_HUMAN  | 1202.3605 | NaN       | 6482.1396 |
| sp O60502 OGA_HUMAN   | 3789.2554 | NaN       | 1922.4055 |

|                       |            |           |           |
|-----------------------|------------|-----------|-----------|
| sp Q02218 ODO1_HUMAN  | 6509.0073  | NaN       | NaN       |
| sp Q9NTK5 OLA1_HUMAN  | 3999.5347  | NaN       | NaN       |
| sp O60313 OPA1_HUMAN  | 2372.3086  | NaN       | 14348.531 |
| sp Q96CV9 OPTN_HUMAN  | 4113.244   | NaN       | 6279.957  |
| sp Q53FV1 ORML2_HUMAN | 1242.1958  | NaN       | 3089.3555 |
| sp Q8N138 ORML3_HUMAN | 352.26205  | NaN       | NaN       |
| sp Q13438 OS9_HUMAN   | 825.2959   | NaN       | NaN       |
| sp P22059 OSBP1_HUMAN | 794.9754   | NaN       | 9746.192  |
| sp Q9BXB4 OSB11_HUMAN | 103.375435 | NaN       | 3270.325  |
| sp Q9BZF1 OSBL8_HUMAN | 7004.273   | NaN       | NaN       |
| sp Q96SU4 OSBL9_HUMAN | 444.50897  | NaN       | NaN       |
| sp Q99650 OSMR_HUMAN  | 565.3985   | NaN       | NaN       |
| sp Q9NRP0 OSTC_HUMAN  | 1899.0834  | NaN       | 37821.055 |
| sp Q92882 OSTF1_HUMAN | 17316.19   | NaN       | NaN       |
| sp Q86WC4 OSTM1_HUMAN | 3493.2969  | NaN       | NaN       |
| sp Q96FW1 OTUB1_HUMAN | 5857.83    | NaN       | 7596.912  |
| sp P55809 SCOT1_HUMAN | 3763.9995  | NaN       | 819.13135 |
| sp O95747 OXSR1_HUMAN | 3174.2295  | NaN       | 5011.6416 |
| sp Q99571 P2RX4_HUMAN | 2079.5073  | NaN       | 3224.3923 |
| sp Q32P28 P3H1_HUMAN  | 8384.667   | 671.91125 | 3803.7212 |
| sp Q8IVL6 P3H3_HUMAN  | 5358.2793  | NaN       | 204.5807  |
| sp Q92791 SC65_HUMAN  | 2764.4907  | NaN       | 1603.2322 |
| sp P13674 P4HA1_HUMAN | 15004.796  | 1519.4902 | 7209.51   |
| sp O15460 P4HA2_HUMAN | 9842.391   | 245.87039 | NaN       |
| sp P07237 PDIA1_HUMAN | 61104.617  | 10144.956 | NaN       |
| sp Q9NXG6 P4HTM_HUMAN | 243.62802  | NaN       | 7383.7437 |
| sp Q9UQ80 PA2G4_HUMAN | 7759.8047  | NaN       | 4676.805  |
| sp P11940 PABP1_HUMAN | 15015.405  | NaN       | 16545.541 |
| sp Q13310 PABP4_HUMAN | 12783.828  | NaN       | 14039.564 |
| sp Q86U42 PABP2_HUMAN | 941.9639   | NaN       | 4724.0625 |
| sp Q6VY07 PACS1_HUMAN | 858.3675   | NaN       | 1599.67   |
| sp Q9UNF0 PACN2_HUMAN | 1900.093   | NaN       | NaN       |
| sp Q9UKS6 PACN3_HUMAN | 3857.2817  | NaN       | NaN       |

|                       |           |           |           |
|-----------------------|-----------|-----------|-----------|
| sp P43034 LIS1_HUMAN  | 27635.707 | NaN       | NaN       |
| sp P68402 PA1B2_HUMAN | 2133.126  | NaN       | NaN       |
| sp Q15102 PA1B3_HUMAN | 5361.329  | NaN       | NaN       |
| sp P22234 PUR6_HUMAN  | 8709.902  | NaN       | 17093.58  |
| sp Q9H074 PAIP1_HUMAN | 2673.1396 | NaN       | 22275.027 |
| sp Q13177 PAK2_HUMAN  | 5709.9136 | NaN       | 10903.222 |
| sp Q8WX93 PALLD_HUMAN | 5299.2227 | 353.0257  | 1818.5118 |
| sp Q8N3R9 PALS1_HUMAN | 674.08734 | NaN       | 1354.1913 |
| sp Q9NZW5 PALS2_HUMAN | 414.54733 | NaN       | 1066.9023 |
| sp Q96RD7 PANX1_HUMAN | 5131.737  | NaN       | 6782.918  |
| sp O43252 PAPS1_HUMAN | 275.3919  | NaN       | 701.9686  |
| sp O95340 PAPS2_HUMAN | 7862.2964 | NaN       | 377.98807 |
| sp Q99497 PARK7_HUMAN | 11380.635 | 1134.2762 | 14570.283 |
| sp Q9UKK3 PARP4_HUMAN | 5851.0234 | NaN       | 722.3667  |
| sp Q9NVD7 PARVA_HUMAN | 4142.8726 | NaN       | 330.83014 |
| sp Q86TB9 PATL1_HUMAN | 3175.1006 | NaN       | NaN       |
| sp Q9BVG4 PBDC1_HUMAN | 231.82993 | NaN       | NaN       |
| sp Q96KB5 TOPK_HUMAN  | 783.22235 | NaN       | NaN       |
| sp Q96AQ6 PBIP1_HUMAN | 6126.532  | NaN       | 1648.2128 |
| sp P11498 PYC_HUMAN   | 9782.315  | NaN       | 8605.894  |
| sp Q15365 PCBP1_HUMAN | 15440.436 | 528.6614  | 594.97864 |
| sp Q15366 PCBP2_HUMAN | 20520.021 | 880.9851  | 163.70924 |
| sp P57721 PCBP3_HUMAN | 1051.6991 | NaN       | 2373.1616 |
| sp P05166 PCCB_HUMAN  | 2191.1948 | NaN       | 2047.427  |
| sp Q9HCL0 PCD18_HUMAN | 5417.1123 | NaN       | NaN       |
| sp Q9Y5G0 PCDGH_HUMAN | 5080.4155 | NaN       | NaN       |
| sp Q9Y5F8 PCDGJ_HUMAN | 935.7332  | NaN       | NaN       |
| sp Q9UN70 PCDGK_HUMAN | 592.63855 | NaN       | 189.43439 |
| sp Q5JVF3 PCID2_HUMAN | 750.6769  | NaN       | 234.3236  |
| sp Q16822 PCKGM_HUMAN | 3222.2036 | NaN       | 2732.1343 |
| sp P22061 PIMT_HUMAN  | 2633.4434 | NaN       | 9779.115  |
| sp P12004 PCNA_HUMAN  | 6291.479  | 216.08955 | 5984.305  |
| sp Q8WW12 PCNP_HUMAN  | 427.34897 | NaN       | 2395.688  |

|                       |           |           |           |
|-----------------------|-----------|-----------|-----------|
| sp Q15113 PCOC1_HUMAN | 6116.0264 | 271.03424 | 7702.091  |
| sp Q9UHG3 PCYOX_HUMAN | 8437.832  | 701.79407 | 3600.8342 |
| sp Q8NBM8 PCYXL_HUMAN | 294.54608 | NaN       | 5041.767  |
| sp P49585 PCY1A_HUMAN | 7413.7363 | NaN       | 1602.7714 |
| sp Q99447 PCY2_HUMAN  | 764.91925 | NaN       | 61.339108 |
| sp Q13442 HAP28_HUMAN | 355.85272 | NaN       | NaN       |
| sp Q9BUL8 PDC10_HUMAN | 1696.4952 | NaN       | NaN       |
| sp Q9BQ51 PD1L2_HUMAN | 383.6776  | NaN       | NaN       |
| sp Q53EL6 PDCD4_HUMAN | 1688.2344 | NaN       | 1073.8915 |
| sp O14737 PDCD5_HUMAN | 1513.3647 | NaN       | 1596.9849 |
| sp O75340 PDCD6_HUMAN | 5592.1636 | NaN       | 193.22717 |
| sp Q8WUM4 PDC6I_HUMAN | 8102.9507 | 149.32597 | 4305.1035 |
| sp Q13371 PHLP_HUMAN  | 368.01453 | NaN       | 7193.0586 |
| sp Q9H2J4 PDCL3_HUMAN | 474.07474 | NaN       | NaN       |
| sp O76074 PDE5A_HUMAN | 12832.26  | NaN       | NaN       |
| sp Q9NRA1 PDGFC_HUMAN | 1217.1648 | NaN       | NaN       |
| sp Q9GZP0 PDGFD_HUMAN | 446.9435  | NaN       | 20988.457 |
| sp P16234 PGFRA_HUMAN | 24208.426 | NaN       | 446.59442 |
| sp P09619 PGFRB_HUMAN | 8646.187  | NaN       | 180.25165 |
| sp P08559 ODPA_HUMAN  | 4375.206  | NaN       | 30938.094 |
| sp P11177 ODPB_HUMAN  | 7159.2256 | NaN       | 4807.627  |
| sp P30101 PDIA3_HUMAN | 62907     | 7617.525  | 3262.7397 |
| sp P13667 PDIA4_HUMAN | 13883.439 | 2991.7864 | 7939.3765 |
| sp Q15084 PDIA6_HUMAN | 25494.158 | 4455.114  | 10064.973 |
| sp O00151 PDLI1_HUMAN | 7843.926  | NaN       | 13215.631 |
| sp Q96HC4 PDLI5_HUMAN | 11333.701 | NaN       | 14739.115 |
| sp Q9NR12 PDLI7_HUMAN | 4746.662  | NaN       | 6267.2646 |
| sp Q8NCN5 PDPR_HUMAN  | 828.8435  | NaN       | NaN       |
| sp Q29RF7 PDS5A_HUMAN | 0         | NaN       | NaN       |
| sp Q9NTI5 PDS5B_HUMAN | 500.0783  | NaN       | NaN       |
| sp Q6P996 PDXD1_HUMAN | 3974.4365 | NaN       | 10306.534 |
| sp O00764 PDXK_HUMAN  | 3364.3638 | NaN       | 1206.3844 |
| sp Q15121 PEA15_HUMAN | 2507.014  | 226.25356 | 3155.7078 |

|                       |            |           |           |
|-----------------------|------------|-----------|-----------|
| sp Q5VY43 PEAR1_HUMAN | 703.15936  | NaN       | 41622.305 |
| sp P30086 PEBP1_HUMAN | 9277.653   | 2233.4292 | 1335.4214 |
| sp Q9UBV8 PEF1_HUMAN  | 2162.1863  | NaN       | 2530.2224 |
| sp Q9BRX2 PELO_HUMAN  | 1333.4866  | NaN       | 5178.2417 |
| sp Q8IZL8 PELP1_HUMAN | 269.3755   | NaN       | 13412.843 |
| sp P12955 PEPD_HUMAN  | 4187.664   | 226.58414 | 16381.164 |
| sp Q96FX8 PERP_HUMAN  | 298.79913  | NaN       | 13569.704 |
| sp O96011 PX11B_HUMAN | 5388.862   | NaN       | 2990.3577 |
| sp O75381 PEX14_HUMAN | 1275.7772  | NaN       | NaN       |
| sp O15067 PUR4_HUMAN  | 1390.8175  | NaN       | NaN       |
| sp O60925 PFD1_HUMAN  | 554.94415  | NaN       | NaN       |
| sp Q9UHV9 PFD2_HUMAN  | 1831.5973  | NaN       | NaN       |
| sp Q9NQP4 PFD4_HUMAN  | 4032.12    | NaN       | 4134.1724 |
| sp Q99471 PFD5_HUMAN  | 1490.8015  | NaN       | NaN       |
| sp O15212 PFD6_HUMAN  | 2433.102   | NaN       | NaN       |
| sp P17858 PFKAL_HUMAN | 14714.992  | NaN       | NaN       |
| sp P08237 PFKAM_HUMAN | 2974.3281  | NaN       | 346.26312 |
| sp Q01813 PFKAP_HUMAN | 16434.824  | NaN       | 8290.943  |
| sp P07737 PROF1_HUMAN | 61015.348  | 11779.853 | 6485.1094 |
| sp P35080 PROF2_HUMAN | 3623.042   | 242.8573  | 13386.237 |
| sp P18669 PGAM1_HUMAN | 13320.595  | 1291.1584 | 1278.5933 |
| sp P52209 6PGD_HUMAN  | 10455.463  | 1469.4402 | 6132.411  |
| sp P00558 PGK1_HUMAN  | 20340.684  | 2589.062  | 1141.3315 |
| sp O95336 6PGL_HUMAN  | 3464.466   | NaN       | 4829.3955 |
| sp Q96PD5 PGRP2_HUMAN | 1190.5425  | NaN       | NaN       |
| sp P36871 PGM1_HUMAN  | 3550.1646  | NaN       | NaN       |
| sp O95394 AGM1_HUMAN  | 4448.3213  | NaN       | NaN       |
| sp O00264 PGRC1_HUMAN | 14909.368  | 93.121475 | 6230.6675 |
| sp O15173 PGRC2_HUMAN | 29298.877  | 1174.5741 | 3658.2783 |
| sp P35232 PHB1_HUMAN  | 10436.7295 | 2820.1213 | 1889.6614 |
| sp Q99623 PHB2_HUMAN  | 16811.424  | 4022.3186 | 9562.554  |
| sp O43175 SERA_HUMAN  | 7437.54    | NaN       | 5634.582  |
| sp Q9NRX4 PHP14_HUMAN | 3725.2126  | NaN       | 4137.5015 |



|                       |           |           |           |
|-----------------------|-----------|-----------|-----------|
| sp Q9BTU6 P4K2A_HUMAN | 17417.914 | NaN       | 790.1896  |
| sp P42356 PI4KA_HUMAN | 3254.49   | 501.95334 | 3423.295  |
| sp Q9UBF8 PI4KB_HUMAN | 159.77946 | NaN       | 5873.851  |
| sp Q13492 PICAL_HUMAN | 6522.1807 | NaN       | 788.89014 |
| sp Q92508 PIEZ1_HUMAN | 16242.914 | NaN       | 2768.4163 |
| sp Q92643 GPI8_HUMAN  | 2664.5615 | NaN       | 8687.725  |
| sp Q96S52 PIGS_HUMAN  | 3505.1304 | NaN       | 20184.186 |
| sp Q969N2 PIGT_HUMAN  | 5135.1826 | NaN       | NaN       |
| sp Q9H490 PIGU_HUMAN  | 2011.1544 | NaN       | NaN       |
| sp Q13526 PIN1_HUMAN  | 1754.0002 | NaN       | NaN       |
| sp P48426 PI42A_HUMAN | 1250.3816 | NaN       | NaN       |
| sp Q8TBX8 PI42C_HUMAN | 1527.2413 | NaN       | 15039.229 |
| sp Q86T03 PP4P1_HUMAN | 3130.6257 | NaN       | 4003.5542 |
| sp Q8N4L2 PP4P2_HUMAN | 1498.5474 | NaN       | 3349.6375 |
| sp O00625 PIR_HUMAN   | 312.35107 | NaN       | NaN       |
| sp Q00169 PIPNA_HUMAN | 985.4979  | NaN       | NaN       |
| sp P48739 PIPNB_HUMAN | 3160.2466 | NaN       | NaN       |
| sp Q5JRX3 PREP_HUMAN  | 9551.408  | NaN       | NaN       |
| sp Q7Z3Z3 PIWL3_HUMAN | 209.63799 | NaN       | 2630.924  |
| sp P14618 KPYM_HUMAN  | 137725.94 | 12481.958 | 8887.24   |
| sp Q16513 PKN2_HUMAN  | 475.4149  | NaN       | 2407.9233 |
| sp P47712 PA24A_HUMAN | 4204.619  | NaN       | 6908.7236 |
| sp Q9Y263 PLAP_HUMAN  | 1946.6333 | NaN       | 328.21713 |
| sp P00749 UROK_HUMAN  | 11040.575 | NaN       | NaN       |
| sp Q03405 UPAR_HUMAN  | 4401.471  | NaN       | NaN       |
| sp Q8NHP8 PLBL2_HUMAN | 3947.7842 | NaN       | NaN       |
| sp P51178 PLCD1_HUMAN | 972.0023  | NaN       | 7203.903  |
| sp Q8N3E9 PLCD3_HUMAN | 451.78436 | NaN       | 8716.891  |
| sp Q8IV08 PLD3_HUMAN  | 8780.095  | 522.0451  | 39087.45  |
| sp Q15149 PLEC_HUMAN  | 13018.696 | 2882.484  | 2872.4912 |
| sp P08567 PLEK_HUMAN  | 305.0295  | NaN       | 17843.06  |
| sp Q96CS7 PKHB2_HUMAN | 1056.427  | NaN       | 2427.1614 |
| sp Q8TD55 PKHO2_HUMAN | 831.37787 | NaN       | 4861.164  |

|                       |           |           |           |
|-----------------------|-----------|-----------|-----------|
| sp P00747 PLMN_HUMAN  | 9098.072  | 2821.8792 | 330.69565 |
| sp Q9HBL7 PLRKT_HUMAN | 3502.2212 | NaN       | 3532.8455 |
| sp O60664 PLIN3_HUMAN | 1491.455  | NaN       | 6562.6416 |
| sp Q02809 PLOD1_HUMAN | 9334.247  | 675.1959  | 729.75757 |
| sp O00469 PLOD2_HUMAN | 6579.0283 | 7939.8184 | 5384.8994 |
| sp O60568 PLOD3_HUMAN | 17241.432 | 1093.353  | 13507.45  |
| sp Q04941 PLP2_HUMAN  | 12164.512 | 306.6324  | 3354.5435 |
| sp O94903 PLPHP_HUMAN | 1351.9376 | NaN       | 7221.949  |
| sp O14494 PLPP1_HUMAN | 1896.2312 | NaN       | 4716.871  |
| sp O14495 PLPP3_HUMAN | 11752.904 | 422.44363 | 9391.025  |
| sp P13797 PLST_HUMAN  | 11980.617 | NaN       | 19566.965 |
| sp O15162 PLS1_HUMAN  | 3989.9785 | NaN       | 8990.354  |
| sp Q9NRY6 PLS3_HUMAN  | 2849.0764 | NaN       | 3402.0151 |
| sp P55058 PLTP_HUMAN  | 1385.6125 | NaN       | 5024.258  |
| sp Q6UX71 PXDC2_HUMAN | 774.1688  | NaN       | 2616.8877 |
| sp Q9UIW2 PLXA1_HUMAN | 2868.3096 | NaN       | 20011.738 |
| sp P51805 PLXA3_HUMAN | 1961.3744 | NaN       | NaN       |
| sp O15031 PLXB2_HUMAN | 8561.232  | NaN       | NaN       |
| sp Q9Y4D7 PLXD1_HUMAN | 1034.4143 | NaN       | NaN       |
| sp P29590 PML_HUMAN   | 1611.9271 | NaN       | 391.72577 |
| sp Q92871 PMM1_HUMAN  | 881.67175 | NaN       | 1746.8093 |
| sp O15305 PMM2_HUMAN  | 1961.6167 | 77.79526  | 4427.5483 |
| sp Q10713 MPPA_HUMAN  | 2993.2173 | NaN       | 19311.504 |
| sp O75439 MPPB_HUMAN  | 2469.1194 | NaN       | 2866.3438 |
| sp Q15126 PMVK_HUMAN  | 2353.7314 | NaN       | NaN       |
| sp Q96T60 PNKP_HUMAN  | 123.46508 | NaN       | NaN       |
| sp P00491 PNPH_HUMAN  | 3735.0793 | NaN       | NaN       |
| sp Q8IY17 PLPL6_HUMAN | 2234.47   | NaN       | NaN       |
| sp Q9NVS9 PNPO_HUMAN  | 1153.0696 | NaN       | 6215.13   |
| sp Q8TCS8 PNPT1_HUMAN | 1560.5525 | NaN       | 18546.373 |
| sp Q9H488 OFUT1_HUMAN | 4521.3833 | NaN       | 2337.897  |
| sp Q9Y2G5 OFUT2_HUMAN | 4796.281  | 177.42581 | 5322.8086 |
| sp Q8NBL1 PGLT1_HUMAN | 889.4155  | NaN       | 1196.1653 |

|                       |           |          |           |
|-----------------------|-----------|----------|-----------|
| sp Q6UW63 PLGT2_HUMAN | 1046.266  | NaN      | 5078.9087 |
| sp Q7Z4H8 PLGT3_HUMAN | 4541.6274 | NaN      | 10148.597 |
| sp Q9Y2S7 PDIP2_HUMAN | 427.04486 | NaN      | NaN       |
| sp O15160 RPAC1_HUMAN | 466.81366 | NaN      | 1940.4318 |
| sp P30876 RPB2_HUMAN  | 420.75928 | NaN      | 3978.7844 |
| sp P19387 RPB3_HUMAN  | 239.95093 | NaN      | NaN       |
| sp P52434 RPAB3_HUMAN | 349.00037 | NaN      | NaN       |
| sp P52435 RPB11_HUMAN | 234.54114 | NaN      | NaN       |
| sp O00411 RPOM_HUMAN  | 0         | NaN      | 7306.6416 |
| sp Q15165 PON2_HUMAN  | 8549.047  | NaN      | NaN       |
| sp P16435 NCPR_HUMAN  | 8345.87   | NaN      | 1834.6211 |
| sp Q15063 POSTN_HUMAN | 458.42496 | NaN      | 28307.615 |
| sp P0CG39 POTEJ_HUMAN | 18515.47  | 0        | 761.3949  |
| sp Q15181 IPYR_HUMAN  | 6933.5625 | NaN      | 4717.5996 |
| sp Q9H2U2 IPYR2_HUMAN | 3940.0046 | NaN      | 15236.668 |
| sp Q06203 PUR1_HUMAN  | 198.21193 | NaN      | 8303.781  |
| sp Q86W92 LIPB1_HUMAN | 368.22842 | NaN      | 9618.082  |
| sp P62937 PPIA_HUMAN  | 68838.91  | 6547.567 | 4532.5225 |
| sp P23284 PPIB_HUMAN  | 60629.36  | 11774.93 | 579.2884  |
| sp P45877 PPIC_HUMAN  | 1448.646  | NaN      | 5753.0117 |
| sp Q9UNP9 PPIE_HUMAN  | 10134.337 | NaN      | 5815.57   |
| sp P30405 PPIF_HUMAN  | 1183.604  | NaN      | NaN       |
| sp P35813 PPM1A_HUMAN | 767.5233  | NaN      | 12542.252 |
| sp Q9Y570 PPME1_HUMAN | 770.8017  | NaN      | 5959.042  |
| sp P62136 PP1A_HUMAN  | 6410.2896 | NaN      | 6275.6113 |
| sp P62140 PP1B_HUMAN  | 10242.944 | NaN      | 4441.882  |
| sp P36873 PP1G_HUMAN  | 9227.357  | NaN      | 12093.444 |
| sp O14974 MYPT1_HUMAN | 807.4968  | NaN      | 5145.069  |
| sp Q6NYC8 PPR18_HUMAN | 594.6193  | NaN      | 3865.1423 |
| sp Q15435 PP1R7_HUMAN | 3875.354  | NaN      | 857.6842  |
| sp P67775 PP2AA_HUMAN | 9039.166  | NaN      | 3372.743  |
| sp P62714 PP2AB_HUMAN | 1458.7744 | NaN      | 8067.011  |
| sp P30153 2AAA_HUMAN  | 8817.175  | NaN      | 13526.341 |

|                       |           |           |           |
|-----------------------|-----------|-----------|-----------|
| sp P63151 2ABA_HUMAN  | 780.30664 | NaN       | NaN       |
| sp Q15172 2A5A_HUMAN  | 275.6254  | NaN       | NaN       |
| sp Q14738 2A5D_HUMAN  | 1671.3607 | NaN       | NaN       |
| sp Q16537 2A5E_HUMAN  | 396.57217 | NaN       | NaN       |
| sp Q08209 PP2BA_HUMAN | 4583.787  | NaN       | NaN       |
| sp P63098 CANB1_HUMAN | 851.2809  | NaN       | NaN       |
| sp P60510 PP4C_HUMAN  | 1784.6697 | NaN       | NaN       |
| sp Q8TF05 PP4R1_HUMAN | 889.5102  | NaN       | 10560.739 |
| sp P53041 PPP5_HUMAN  | 4771.395  | NaN       | 23385.72  |
| sp O00743 PPP6_HUMAN  | 2829.5276 | NaN       | 2360.6318 |
| sp Q9UPN7 PP6R1_HUMAN | 569.44745 | NaN       | NaN       |
| sp O75170 PP6R2_HUMAN | 651.64746 | NaN       | 2599.012  |
| sp Q5H9R7 PP6R3_HUMAN | 1546.9899 | NaN       | 4888.969  |
| sp P50897 PPT1_HUMAN  | 938.98834 | NaN       | 798.35974 |
| sp O60831 PRAF2_HUMAN | 3822.0435 | 458.1132  | 12135.607 |
| sp P42785 PCP_HUMAN   | 3353.1753 | NaN       | 651.75134 |
| sp Q06830 PRDX1_HUMAN | 28949.389 | 2713.1016 | 820.8552  |
| sp P32119 PRDX2_HUMAN | 4983.7812 | NaN       | 9465.726  |
| sp P30048 PRDX3_HUMAN | 10210.743 | 583.71045 | 1170.6246 |
| sp Q13162 PRDX4_HUMAN | 11837.032 | 1047.7313 | 3773.3015 |
| sp P30044 PRDX5_HUMAN | 10780.763 | 843.25446 | 813.95905 |
| sp P30041 PRDX6_HUMAN | 9739.162  | 1369.1989 | 27116.375 |
| sp Q9HCU5 PREB_HUMAN  | 617.7152  | NaN       | 2184.3682 |
| sp P48147 PPCE_HUMAN  | 1759.4421 | NaN       | 10616.273 |
| sp Q13131 AAPK1_HUMAN | 2541.2734 | NaN       | 7323.9897 |
| sp Q9Y478 AAKB1_HUMAN | 232.7196  | NaN       | 1228.3428 |
| sp P17612 KAPCA_HUMAN | 756.0645  | NaN       | 3395.8823 |
| sp P22694 KAPCB_HUMAN | 3512.685  | NaN       | 4565.855  |
| sp P54619 AAKG1_HUMAN | 519.544   | NaN       | 16158.578 |
| sp P10644 KAP0_HUMAN  | 16368.116 | 368.55585 | 16317.613 |
| sp P13861 KAP2_HUMAN  | 4704.5923 | NaN       | 15813.129 |
| sp P17252 KPCA_HUMAN  | 7636.048  | NaN       | 2008.7837 |
| sp P41743 KPCI_HUMAN  | 407.90814 | NaN       | 8129.26   |

|                       |           |           |           |
|-----------------------|-----------|-----------|-----------|
| sp P14314 GLU2B_HUMAN | 25752.799 | 3448.3125 | 899.928   |
| sp Q15139 KPCD1_HUMAN | 549.65186 | NaN       | 19184.754 |
| sp P78527 PRKDC_HUMAN | 9662.717  | NaN       | 997.6496  |
| sp O75569 PRKRA_HUMAN | 3992.0413 | NaN       | 6132.243  |
| sp Q99873 ANM1_HUMAN  | 5788.0537 | NaN       | 1807.2893 |
| sp O14744 ANM5_HUMAN  | 3938.5664 | NaN       | NaN       |
| sp P04156 PRIO_HUMAN  | 3206.5955 | NaN       | NaN       |
| sp P07225 PROS_HUMAN  | 2043.1648 | NaN       | NaN       |
| sp Q9UMS4 PRP19_HUMAN | 852.17114 | NaN       | NaN       |
| sp O75400 PR40A_HUMAN | 826.0634  | NaN       | NaN       |
| sp O94906 PRP6_HUMAN  | 453.2023  | NaN       | NaN       |
| sp Q6P2Q9 PRP8_HUMAN  | 4290.7837 | NaN       | NaN       |
| sp P60891 PRPS1_HUMAN | 8669.683  | NaN       | 686.15857 |
| sp P11908 PRPS2_HUMAN | 5530.4746 | NaN       | 5234.419  |
| sp Q14558 KPRA_HUMAN  | 8404.825  | NaN       | 1795.3301 |
| sp Q96M27 PRRC1_HUMAN | 1379.5251 | NaN       | 3170.6155 |
| sp O14668 TMG1_HUMAN  | 110.53403 | NaN       | 11534.227 |
| sp P07477 TRY1_HUMAN  | 3444.7852 | 632.0054  | 1506.8656 |
| sp Q9BRX8 PXL2A_HUMAN | 2320.137  | NaN       | 7649.5103 |
| sp P07602 SAP_HUMAN   | 13832.054 | 5336.879  | 15235.477 |
| sp Q9NYI0 PSD3_HUMAN  | 567.6014  | NaN       | 139.69128 |
| sp P49768 PSN1_HUMAN  | 3940.9717 | NaN       | 3767.5156 |
| sp Q9NZ42 PEN2_HUMAN  | 835.4646  | NaN       | 3478.1196 |
| sp P25786 PSA1_HUMAN  | 7334.0386 | 369.13843 | 1694.7878 |
| sp P25787 PSA2_HUMAN  | 7354.598  | NaN       | 40815.78  |
| sp P25788 PSA3_HUMAN  | 6521.2637 | 237.40991 | 34337.797 |
| sp P25789 PSA4_HUMAN  | 6719.7505 | NaN       | 17938.85  |
| sp P28066 PSA5_HUMAN  | 6366.8154 | NaN       | 1281.7264 |
| sp P60900 PSA6_HUMAN  | 9608.665  | 345.93692 | 11519.172 |
| sp O14818 PSA7_HUMAN  | 11223.208 | 912.16486 | 915.7368  |
| sp P20618 PSB1_HUMAN  | 7483.279  | NaN       | 1512.1481 |
| sp P49721 PSB2_HUMAN  | 10477.686 | NaN       | 1797.7166 |
| sp P49720 PSB3_HUMAN  | 8269.948  | NaN       | 642.1042  |

|                       |           |            |           |
|-----------------------|-----------|------------|-----------|
| sp P28070 PSB4_HUMAN  | 8771.118  | 856.34216  | 7353.5166 |
| sp P28074 PSB5_HUMAN  | 5749.557  | NaN        | 16912.01  |
| sp P28072 PSB6_HUMAN  | 4839.056  | NaN        | NaN       |
| sp Q99436 PSB7_HUMAN  | 1937.06   | NaN        | NaN       |
| sp P28062 PSB8_HUMAN  | 1926.929  | NaN        | NaN       |
| sp P28065 PSB9_HUMAN  | 226.92973 | NaN        | 2856.187  |
| sp P62191 PRS4_HUMAN  | 10578.498 | NaN        | 5155.867  |
| sp P35998 PRS7_HUMAN  | 16062.956 | NaN        | 894.22754 |
| sp P17980 PRS6A_HUMAN | 10257.93  | 332.06393  | 7371.4907 |
| sp P43686 PRS6B_HUMAN | 10332.63  | 393.66458  | 23051.602 |
| sp P62195 PRS8_HUMAN  | 8993.958  | 107.845955 | 10026.208 |
| sp P62333 PRS10_HUMAN | 6270.952  | NaN        | 1158.5726 |
| sp Q99460 PSMD1_HUMAN | 9476.047  | NaN        | 2115.4912 |
| sp O75832 PSD10_HUMAN | 2033.9841 | NaN        | 5497.6235 |
| sp O00231 PSD11_HUMAN | 9242.186  | NaN        | 1290.0359 |
| sp O00232 PSD12_HUMAN | 11638.888 | 280.3556   | 13054.225 |
| sp Q9UNM6 PSD13_HUMAN | 9296.7295 | 291.21417  | 25427.264 |
| sp O00487 PSDE_HUMAN  | 7168.768  | NaN        | 5758.9536 |
| sp Q13200 PSMD2_HUMAN | 12539.635 | 159.78864  | 1059.2395 |
| sp O43242 PSMD3_HUMAN | 9754.092  | NaN        | 2592.9202 |
| sp P55036 PSMD4_HUMAN | 7256.133  | NaN        | NaN       |
| sp Q16401 PSMD5_HUMAN | 4874.438  | NaN        | NaN       |
| sp Q15008 PSMD6_HUMAN | 11482.023 | NaN        | NaN       |
| sp P51665 PSMD7_HUMAN | 6399.6084 | NaN        | 4571.9043 |
| sp P48556 PSMD8_HUMAN | 3349.1086 | NaN        | 10508.887 |
| sp O00233 PSMD9_HUMAN | 1474.0391 | NaN        | 5161.2573 |
| sp Q06323 PSME1_HUMAN | 8875.082  | 352.5288   | 3847.3215 |
| sp Q9UL46 PSME2_HUMAN | 2791.1306 | 356.38898  | 260.5541  |
| sp P61289 PSME3_HUMAN | 330.9218  | NaN        | 7514.5234 |
| sp Q92530 PSMF1_HUMAN | 3266.081  | NaN        | 30968.953 |
| sp O95456 PSMG1_HUMAN | 134.72348 | NaN        | NaN       |
| sp P26599 PTBP1_HUMAN | 6295.95   | NaN        | NaN       |
| sp O95758 PTBP3_HUMAN | 539.7247  | NaN        | 1058.553  |

|                       |           |           |           |
|-----------------------|-----------|-----------|-----------|
| sp Q96EY7 PTCD3_HUMAN | 226.17256 | NaN       | 1629.2313 |
| sp P48651 PTSS1_HUMAN | 1931.667  | NaN       | NaN       |
| sp Q9BVG9 PTSS2_HUMAN | 850.35095 | NaN       | NaN       |
| sp P60484 PTEN_HUMAN  | 634.38824 | NaN       | 3207.7417 |
| sp O14684 PTGES_HUMAN | 22049.975 | 314.59512 | 532.5813  |
| sp Q9H7Z7 PGES2_HUMAN | 847.9713  | NaN       | 12621.843 |
| sp Q15185 TEBP_HUMAN  | 9755.8545 | 624.1104  | 2149.9119 |
| sp Q14914 PTGR1_HUMAN | 4633.047  | 725.54846 | 2194.6125 |
| sp P23219 PGH1_HUMAN  | 6019.235  | 519.3402  | 723.2398  |
| sp P35354 PGH2_HUMAN  | 5754.3833 | NaN       | 384.16928 |
| sp Q13308 PTK7_HUMAN  | 6961.9414 | NaN       | 4504.2373 |
| sp P06454 PTMA_HUMAN  | 6123.9087 | 450.96906 | 1353.7605 |
| sp P20962 PTMS_HUMAN  | 680.6328  | 214.21231 | 5851.3687 |
| sp P21246 PTN_HUMAN   | 404.85568 | NaN       | 400.20026 |
| sp Q12974 TP4A2_HUMAN | 1006.5658 | NaN       | 4368.738  |
| sp Q8WUK0 PTPM1_HUMAN | 293.42538 | NaN       | 8669.873  |
| sp P18031 PTN1_HUMAN  | 3368.166  | NaN       | 1328.0815 |
| sp Q06124 PTN11_HUMAN | 3052.348  | NaN       | 10819.744 |
| sp Q05209 PTN12_HUMAN | 427.73645 | NaN       | 17924.82  |
| sp P43378 PTN9_HUMAN  | 236.84816 | NaN       | 7212.605  |
| sp P18433 PTPRA_HUMAN | 1476.0076 | NaN       | 5717.457  |
| sp P23468 PTPRD_HUMAN | 4218.364  | NaN       | 7630.7705 |
| sp P10586 PTPRF_HUMAN | 1251.7568 | 166.73006 | 13793.02  |
| sp Q12913 PTPRJ_HUMAN | 754.4199  | NaN       | 4227.0195 |
| sp Q15262 PTPRK_HUMAN | 7074.0303 | NaN       | NaN       |
| sp P28827 PTPRM_HUMAN | 3464.088  | NaN       | NaN       |
| sp Q13332 PTPRS_HUMAN | 530.05493 | NaN       | 2673.2827 |
| sp Q9Y3E5 PTH2_HUMAN  | 2640.5747 | NaN       | 4180.786  |
| sp P53801 PTTG_HUMAN  | 4397.009  | 1488.0052 | 1284.9064 |
| sp Q96QR8 PURB_HUMAN  | 194.01643 | NaN       | 12419.083 |
| sp P15151 PVR_HUMAN   | 3156.107  | NaN       | 3059.9417 |
| sp Q5TGL8 PXDC1_HUMAN | 274.75925 | NaN       | 1326.7375 |
| sp Q92626 PXDN_HUMAN  | 2242.28   | NaN       | 16389.553 |

|                       |            |           |           |
|-----------------------|------------|-----------|-----------|
| sp P49023 PAXI_HUMAN  | 299.77783  | NaN       | NaN       |
| sp Q9ULZ3 ASC_HUMAN   | 846.0512   | NaN       | NaN       |
| sp P32322 P5CR1_HUMAN | 135.56212  | NaN       | 1778.9001 |
| sp Q96C36 P5CR2_HUMAN | 1319.7041  | NaN       | 11328.674 |
| sp Q53H96 P5CR3_HUMAN | 861.311    | NaN       | 3695.0876 |
| sp P11216 PYGB_HUMAN  | 4363.6914  | NaN       | 589.62915 |
| sp P06737 PYGL_HUMAN  | 4132.0596  | NaN       | 3023.9097 |
| sp P11217 PYGM_HUMAN  | 888.93823  | NaN       | 30804.47  |
| sp P20742 PZP_HUMAN   | 19992.295  | 1547.9641 | 7471.202  |
| sp P47897 SYQ_HUMAN   | 3602.8306  | 78.52638  | 569.93463 |
| sp P09417 DHPR_HUMAN  | 2573.7097  | NaN       | 1234.8442 |
| sp Q6ZRP7 QSOX2_HUMAN | 5905.2915  | NaN       | 7371.72   |
| sp P61026 RAB10_HUMAN | 16116.546  | 891.815   | 4611.8877 |
| sp Q15907 RB11B_HUMAN | 19160.2    | 2072.4739 | 9016.119  |
| sp Q9BXF6 RFIP5_HUMAN | 713.4169   | NaN       | 27981.822 |
| sp Q6IQ22 RAB12_HUMAN | 1630.8975  | NaN       | 5054.048  |
| sp P51153 RAB13_HUMAN | 3946.6099  | 1115.1572 | 1066.033  |
| sp P61106 RAB14_HUMAN | 16211.289  | 904.95276 | 6965.747  |
| sp Q9NP72 RAB18_HUMAN | 14887.107  | 679.9917  | 15223.835 |
| sp A4D1S5 RAB19_HUMAN | 0          | NaN       | 18988.979 |
| sp P62820 RAB1A_HUMAN | 10597.16   | 1420.736  | 2975.3276 |
| sp Q9H0U4 RAB1B_HUMAN | 22104.953  | 2655.098  | 8166.8276 |
| sp Q9UL25 RAB21_HUMAN | 14417.1455 | 496.43652 | 19652.73  |
| sp Q9UL26 RB22A_HUMAN | 800.9635   | NaN       | 1597.7604 |
| sp Q9ULC3 RAB23_HUMAN | 6704.428   | NaN       | NaN       |
| sp Q969Q5 RAB24_HUMAN | 2257.7937  | NaN       | NaN       |
| sp P51159 RB27A_HUMAN | 5502.814   | NaN       | 11041.83  |
| sp O00194 RB27B_HUMAN | 9084.314   | NaN       | 13473.725 |
| sp O14966 RAB7L_HUMAN | 1164.0781  | NaN       | 728.95886 |
| sp P61019 RAB2A_HUMAN | 22093.906  | 718.766   | 498.9684  |
| sp Q8WUD1 RAB2B_HUMAN | 1380.8127  | NaN       | 4229.3755 |
| sp Q15771 RAB30_HUMAN | 912.3308   | NaN       | 15458.281 |
| sp Q13636 RAB31_HUMAN | 11422.002  | NaN       | 2536.5674 |



|                       |           |           |           |
|-----------------------|-----------|-----------|-----------|
| sp Q13637 RAB32_HUMAN | 12003.037 | NaN       | 3801.1885 |
| sp Q9BZG1 RAB34_HUMAN | 6095.9067 | NaN       | 2137.7214 |
| sp P0DI83 NARR_HUMAN  | 768.21545 | NaN       | 19901.37  |
| sp Q15286 RAB35_HUMAN | 5624.3364 | 118.34467 | 16992.512 |
| sp P20337 RAB3B_HUMAN | 2928.2651 | 418.05582 | 14221.508 |
| sp O95716 RAB3D_HUMAN | 1183.5631 | NaN       | 6188.8374 |
| sp Q15042 RB3GP_HUMAN | 655.4699  | NaN       | NaN       |
| sp Q9H2M9 RBGPR_HUMAN | 2277.3845 | NaN       | NaN       |
| sp Q86YS6 RAB43_HUMAN | 1202.888  | NaN       | 2245.858  |
| sp P20338 RAB4A_HUMAN | 549.8299  | NaN       | 1192.0348 |
| sp P20339 RAB5A_HUMAN | 22101.29  | 1284.4973 | 1843.1451 |
| sp P61020 RAB5B_HUMAN | 10229.937 | NaN       | 2861.4238 |
| sp P51148 RAB5C_HUMAN | 15217.383 | 1560.6705 | 10391.767 |
| sp P20340 RAB6A_HUMAN | 5999.525  | 1269.4329 | 10322.078 |
| sp Q9H0N0 RAB6C_HUMAN | 1678.6416 | NaN       | 1645.8677 |
| sp P51149 RAB7A_HUMAN | 56600.973 | 5688.155  | 654.2012  |
| sp P61006 RAB8A_HUMAN | 6236.3037 | NaN       | 250.3522  |
| sp Q92930 RAB8B_HUMAN | 1457.5054 | NaN       | NaN       |
| sp P51151 RAB9A_HUMAN | 3161.5703 | NaN       | NaN       |
| sp Q9UI14 PRAF1_HUMAN | 1934.0271 | NaN       | NaN       |
| sp Q15276 RABE1_HUMAN | 729.26044 | NaN       | NaN       |
| sp Q9H5N1 RABE2_HUMAN | 1183.6417 | NaN       | NaN       |
| sp Q9Y3P9 RBGP1_HUMAN | 2610.0486 | NaN       | 1442.555  |
| sp Q92696 PGTA_HUMAN  | 392.87515 | NaN       | 2424.4045 |
| sp P47224 MSS4_HUMAN  | 338.17877 | NaN       | 13421.282 |
| sp P63000 RAC1_HUMAN  | 22461.139 | 1992.2498 | 9918.837  |
| sp P63244 RACK1_HUMAN | 24047.85  | 942.5502  | 8792.63   |
| sp P54725 RD23A_HUMAN | 684.50055 | NaN       | 212.17326 |
| sp P54727 RD23B_HUMAN | 4761.0586 | NaN       | 4914.587  |
| sp Q92878 RAD50_HUMAN | 199.86935 | NaN       | 4956.6206 |
| sp Q9P0K7 RAI14_HUMAN | 5372.9136 | NaN       | 4656.0244 |
| sp P11233 RALA_HUMAN  | 6685.9204 | 157.15184 | 5253.683  |
| sp P11234 RALB_HUMAN  | 5534.5293 | 114.67763 | 1618.7756 |

|                       |           |           |           |
|-----------------------|-----------|-----------|-----------|
| sp Q86X27 RGPS2_HUMAN | 761.6301  | NaN       | 5513.5117 |
| sp Q9UKM9 RALY_HUMAN  | 971.4602  | NaN       | 7774.0244 |
| sp P62826 RAN_HUMAN   | 19006.297 | 1561.5972 | 1265.9963 |
| sp P43487 RANG_HUMAN  | 2119.63   | NaN       | NaN       |
| sp P49792 RBP2_HUMAN  | 2419.2922 | NaN       | NaN       |
| sp O60518 RNBP6_HUMAN | 1128.2406 | NaN       | 3586.7764 |
| sp P46060 RAGP1_HUMAN | 10110.496 | NaN       | 2620.1267 |
| sp P62834 RAP1A_HUMAN | 6229.856  | NaN       | 8367.654  |
| sp P61224 RAP1B_HUMAN | 19099.93  | 2256.5698 | 25521.504 |
| sp P52306 GDS1_HUMAN  | 6649.584  | NaN       | 5777.556  |
| sp P10114 RAP2A_HUMAN | 302.11682 | NaN       | NaN       |
| sp P61225 RAP2B_HUMAN | 3661.5557 | NaN       | NaN       |
| sp Q9Y3L5 RAP2C_HUMAN | 1750.457  | NaN       | NaN       |
| sp Q99969 RARR2_HUMAN | 0         | NaN       | NaN       |
| sp P54136 SYRC_HUMAN  | 9371.172  | NaN       | NaN       |
| sp P20936 RASA1_HUMAN | 2805.8293 | NaN       | 11053.266 |
| sp Q14644 RASA3_HUMAN | 663.9779  | NaN       | 863.6577  |
| sp Q09028 RBBP4_HUMAN | 4750.9404 | NaN       | 4263.881  |
| sp Q9NTZ6 RBM12_HUMAN | 3915.5051 | 310.13467 | 5278.249  |
| sp Q96PK6 RBM14_HUMAN | 1214.3531 | NaN       | 1144.5822 |
| sp P49756 RBM25_HUMAN | 701.28284 | NaN       | 9630.642  |
| sp P29558 RBMS1_HUMAN | 726.2487  | NaN       | NaN       |
| sp P38159 RBMX_HUMAN  | 1379.1832 | NaN       | NaN       |
| sp P09455 RET1_HUMAN  | 4556.0654 | NaN       | 3294.383  |
| sp P02753 RET4_HUMAN  | 12778.551 | 4117.3877 | 7555.873  |
| sp P62877 RBX1_HUMAN  | 1287.8188 | NaN       | 1767.7821 |
| sp Q15293 RCN1_HUMAN  | 16821.63  | 9695.657  | 3685.4617 |
| sp Q14257 RCN2_HUMAN  | 7840.612  | NaN       | 6890.74   |
| sp Q96D15 RCN3_HUMAN  | 9629.7    | 1641.3103 | 6826.833  |
| sp Q8IZV5 RDH10_HUMAN | 3759.2236 | NaN       | 3430.7644 |
| sp Q8TC12 RDH11_HUMAN | 5757.581  | 61.6589   | 4996.619  |
| sp Q9HBH5 RDH14_HUMAN | 697.2698  | NaN       | 6266.8447 |
| sp P35241 RADI_HUMAN  | 18006.215 | 540.9657  | 1202.2422 |

|                       |           |           |            |
|-----------------------|-----------|-----------|------------|
| sp O95980 RECK_HUMAN  | 2717.749  | NaN       | 485.8197   |
| sp P46063 RECQ1_HUMAN | 4383.3184 | NaN       | 9605.497   |
| sp Q00765 REEP5_HUMAN | 4263.2144 | 387.91977 | 24306.049  |
| sp Q04206 TF65_HUMAN  | 3394.2803 | NaN       | 26986.855  |
| sp Q9P260 RELCH_HUMAN | 639.79626 | NaN       | 16188.517  |
| sp Q8IUW5 RELL1_HUMAN | 255.16064 | NaN       | NaN        |
| sp O15258 RER1_HUMAN  | 9312.187  | NaN       | NaN        |
| sp Q8NC44 RETR2_HUMAN | 622.8218  | NaN       | NaN        |
| sp Q86VR2 RETR3_HUMAN | 3015.2217 | NaN       | NaN        |
| sp Q6NUM9 RETST_HUMAN | 4697.0786 | NaN       | NaN        |
| sp Q9Y3B8 ORN_HUMAN   | 1438.5001 | NaN       | 3018.234   |
| sp P35250 RFC2_HUMAN  | 158.17429 | NaN       | 6203.2314  |
| sp P40938 RFC3_HUMAN  | 105.27614 | NaN       | 3940.5164  |
| sp P40937 RFC5_HUMAN  | 574.7096  | NaN       | 7928.8687  |
| sp Q96AA3 RFT1_HUMAN  | 476.73126 | NaN       | NaN        |
| sp Q14699 RFTN1_HUMAN | 7226.8027 | NaN       | NaN        |
| sp Q15493 RGN_HUMAN   | 2250.2458 | NaN       | NaN        |
| sp Q6NTF9 RHBD2_HUMAN | 258.3585  | NaN       | NaN        |
| sp Q15382 RHEB_HUMAN  | 6268.991  | NaN       | NaN        |
| sp P61586 RHOA_HUMAN  | 6156.255  | 487.97244 | 7880.0493  |
| sp P62745 RHOB_HUMAN  | 1476.2552 | NaN       | 4200.883   |
| sp P08134 RHOC_HUMAN  | 21473.8   | 1385.5232 | 10772.816  |
| sp P84095 RHOG_HUMAN  | 9145.751  | NaN       | 8018.8433  |
| sp Q8IXI1 MIRO2_HUMAN | 3007.919  | NaN       | NaN        |
| sp Q9NPQ8 RIC8A_HUMAN | 2813.2646 | NaN       | NaN        |
| sp Q6R327 RICTR_HUMAN | 498.8261  | NaN       | NaN        |
| sp Q13671 RIN1_HUMAN  | 529.3089  | NaN       | NaN        |
| sp Q6NUQ1 RINT1_HUMAN | 1077.5345 | NaN       | NaN        |
| sp Q6ZS17 RIPR1_HUMAN | 3308.9482 | NaN       | NaN        |
| sp Q96TC7 RMD3_HUMAN  | 376.40256 | NaN       | NaN        |
| sp P34096 RNAS4_HUMAN | 449.7221  | NaN       | NaN        |
| sp P61587 RND3_HUMAN  | 3414.3286 | NaN       | NaN        |
| sp Q9Y508 RN114_HUMAN | 421.46448 | NaN       | 15727.4795 |

|                       |           |           |           |
|-----------------------|-----------|-----------|-----------|
| sp Q9H920 RN121_HUMAN | 768.36145 | NaN       | NaN       |
| sp Q8NC42 RN149_HUMAN | 2281.3267 | NaN       | NaN       |
| sp Q9ULK6 RN150_HUMAN | 1618.8075 | NaN       | NaN       |
| sp Q96K19 RN170_HUMAN | 250.89047 | NaN       | NaN       |
| sp Q63HN8 RN213_HUMAN | 7224.3906 | NaN       | NaN       |
| sp Q9Y225 RNF24_HUMAN | 239.72018 | NaN       | 5383.6943 |
| sp P13489 RINI_HUMAN  | 12223.969 | 1943.6575 | 1466.6243 |
| sp Q9H4A4 AMPB_HUMAN  | 5632.802  | NaN       | 5937.29   |
| sp Q15287 RNPS1_HUMAN | 485.7656  | NaN       | 10079.657 |
| sp P10155 RO60_HUMAN  | 1274.9913 | NaN       | 7290.3335 |
| sp Q9Y6N7 ROBO1_HUMAN | 401.77948 | NaN       | 10056.926 |
| sp O75116 ROCK2_HUMAN | 2247.9504 | NaN       | 5498.079  |
| sp P60602 ROMO1_HUMAN | 747.0316  | NaN       | 9408.245  |
| sp O75695 XRP2_HUMAN  | 3908.8462 | 159.52766 | 208.20468 |
| sp P27635 RL10_HUMAN  | 17044.857 | 526.76935 | 2131.8042 |
| sp P62906 RL10A_HUMAN | 14430.519 | NaN       | 1518.8401 |
| sp P62913 RL11_HUMAN  | 17156.885 | 712.7408  | 16602.527 |
| sp P30050 RL12_HUMAN  | 17484.605 | 688.56836 | 2811.2314 |
| sp P26373 RL13_HUMAN  | 10323.811 | 450.3937  | 23499.88  |
| sp P40429 RL13A_HUMAN | 10474.187 | NaN       | 3497.6138 |
| sp P50914 RL14_HUMAN  | 19621.744 | 752.2949  | 4680.8374 |
| sp P61313 RL15_HUMAN  | 13307.527 | NaN       | 709.6682  |
| sp P18621 RL17_HUMAN  | 15830.762 | 832.5184  | 2813.4128 |
| sp Q07020 RL18_HUMAN  | 14818.29  | 1404.1779 | 800.1678  |
| sp Q02543 RL18A_HUMAN | 11956.807 | 1644.2764 | 12522.737 |
| sp P84098 RL19_HUMAN  | 7040.9355 | NaN       | 5400.2417 |
| sp P46778 RL21_HUMAN  | 9705.754  | NaN       | 9542.551  |
| sp P35268 RL22_HUMAN  | 13014.418 | 1998.0135 | 4485.5054 |
| sp Q6P5R6 RL22L_HUMAN | 0         | NaN       | 6630.504  |
| sp P62829 RL23_HUMAN  | 21614.766 | 1400.0175 | 6987.5894 |
| sp P62750 RL23A_HUMAN | 9866.355  | 1013.4169 | 5356.172  |
| sp P83731 RL24_HUMAN  | 6677.956  | NaN       | 1753.3086 |
| sp P61254 RL26_HUMAN  | 26262.678 | NaN       | 400.8034  |

|                       |           |           |           |
|-----------------------|-----------|-----------|-----------|
| sp P61353 RL27_HUMAN  | 18995.516 | NaN       | 7218.017  |
| sp P46776 RL27A_HUMAN | 9692.514  | 1941.3374 | 21247.154 |
| sp P46779 RL28_HUMAN  | 18036.146 | 179.53156 | 9046.972  |
| sp P47914 RL29_HUMAN  | 918.8819  | NaN       | 685.6671  |
| sp P39023 RL3_HUMAN   | 10562.172 | 600.9176  | 1531.6525 |
| sp P62888 RL30_HUMAN  | 21152.684 | 1372.116  | 9250.227  |
| sp P62899 RL31_HUMAN  | 9095.22   | NaN       | 1884.1816 |
| sp P62910 RL32_HUMAN  | 17672.047 | 399.30682 | 4793.895  |
| sp P49207 RL34_HUMAN  | 3728.3154 | NaN       | 6996.441  |
| sp P42766 RL35_HUMAN  | 3961.8545 | NaN       | 3537.6787 |
| sp P18077 RL35A_HUMAN | 3012.4438 | NaN       | 3024.5142 |
| sp Q9Y3U8 RL36_HUMAN  | 3961.417  | NaN       | 3482.4834 |
| sp P83881 RL36A_HUMAN | 761.41534 | NaN       | 2766.723  |
| sp P61513 RL37A_HUMAN | 3176.719  | NaN       | 19276.346 |
| sp P63173 RL38_HUMAN  | 4750.8    | NaN       | 7613.8984 |
| sp P36578 RL4_HUMAN   | 17827.936 | 588.13513 | 6308.2275 |
| sp P46777 RL5_HUMAN   | 18749.828 | 215.04025 | 1298.1213 |
| sp Q02878 RL6_HUMAN   | 16040.242 | 309.60614 | 3926.1973 |
| sp P18124 RL7_HUMAN   | 14264.387 | 174.71678 | 297.55426 |
| sp P62424 RL7A_HUMAN  | 24369.268 | 1108.5166 | 11438.609 |
| sp P62917 RL8_HUMAN   | 4298.1265 | 189.59044 | 12521.012 |
| sp P32969 RL9_HUMAN   | 18649.955 | 821.55005 | 2051.2988 |
| sp P05388 RLA0_HUMAN  | 12255.995 | 2109.2996 | 2012.8228 |
| sp P05386 RLA1_HUMAN  | 45223.027 | NaN       | 793.1139  |
| sp P05387 RLA2_HUMAN  | 17665.55  | 1112.2051 | 10555.59  |
| sp P04843 RPN1_HUMAN  | 24099.615 | 5577.271  | 3217.8403 |
| sp P04844 RPN2_HUMAN  | 20345.49  | 2816.5984 | 2296.2144 |
| sp O95059 RPP14_HUMAN | 0         | NaN       | 1476.8862 |
| sp Q9NQG5 RPR1B_HUMAN | 162.77582 | NaN       | 4077.6462 |
| sp P46783 RS10_HUMAN  | 11013.222 | NaN       | 1529.6799 |
| sp P62280 RS11_HUMAN  | 12478.986 | 244.52673 | 3823.587  |
| sp P25398 RS12_HUMAN  | 16235.6   | 108.5557  | 470.02527 |
| sp P62277 RS13_HUMAN  | 13864.268 | 329.53467 | 5101.243  |

|                       |           |            |           |
|-----------------------|-----------|------------|-----------|
| sp P62263 RS14_HUMAN  | 14861.179 | 887.41406  | 1066.5015 |
| sp P62841 RS15_HUMAN  | 4028.9094 | NaN        | 788.66455 |
| sp P62244 RS15A_HUMAN | 7636.3145 | 433.32855  | 8911.137  |
| sp P62249 RS16_HUMAN  | 6499.2944 | 355.04935  | 3057.0583 |
| sp P08708 RS17_HUMAN  | 8717.409  | 1013.68835 | 9816.196  |
| sp P62269 RS18_HUMAN  | 15150.615 | 1128.4252  | 2904.0532 |
| sp P39019 RS19_HUMAN  | 8354.995  | 276.72525  | 5016.9272 |
| sp P15880 RS2_HUMAN   | 16880.475 | 605.22504  | 6742.357  |
| sp P60866 RS20_HUMAN  | 11641.926 | 816.94147  | 9968.761  |
| sp P63220 RS21_HUMAN  | 3988.5317 | 600.9195   | 13243.779 |
| sp P62266 RS23_HUMAN  | 5326.603  | 181.84991  | 1507.562  |
| sp P62847 RS24_HUMAN  | 10589.278 | NaN        | 9084.182  |
| sp P62851 RS25_HUMAN  | 9435.524  | 440.14612  | 2454.2808 |
| sp P62854 RS26_HUMAN  | 5223.144  | 172.98994  | 2476.832  |
| sp P42677 RS27_HUMAN  | 1905.041  | 279.1067   | 2607.2512 |
| sp P62979 RS27A_HUMAN | 43828.91  | 4839.8984  | 448.06516 |
| sp Q71UM5 RS27L_HUMAN | 5650.2944 | NaN        | 8618.809  |
| sp P62857 RS28_HUMAN  | 2296.4292 | NaN        | 9511.137  |
| sp P23396 RS3_HUMAN   | 23738.09  | 1959.2283  | 979.854   |
| sp P61247 RS3A_HUMAN  | 25754.574 | 3967.7231  | 2462.3276 |
| sp P62701 RS4X_HUMAN  | 39482.03  | 1729.2206  | 825.08636 |
| sp P22090 RS4Y1_HUMAN | 2379.0737 | NaN        | 1724.158  |
| sp P46782 RS5_HUMAN   | 12589.425 | 1515.9664  | 5546.6855 |
| sp P62753 RS6_HUMAN   | 14753.955 | 1599.6377  | 3973.2188 |
| sp P51812 KS6A3_HUMAN | 1283.4279 | NaN        | 2923.0002 |
| sp P62081 RS7_HUMAN   | 6281.001  | 148.72002  | 3039.2993 |
| sp P62241 RS8_HUMAN   | 34649.586 | 957.05505  | 1722.3994 |
| sp P46781 RS9_HUMAN   | 23197.81  | NaN        | 6681.791  |
| sp P08865 RSSA_HUMAN  | 22404.088 | 1652.3284  | 2909.6003 |
| sp Q7L523 RRAGA_HUMAN | 6067.823  | NaN        | 1820.8569 |
| sp Q9HB90 RRAGC_HUMAN | 6298.175  | 467.32526  | 4091.9373 |
| sp P10301 RRAS_HUMAN  | 13067.908 | 294.70657  | 2845.5847 |
| sp P62070 RRAS2_HUMAN | 6514.671  | NaN        | 3936.3892 |

|                       |           |           |           |
|-----------------------|-----------|-----------|-----------|
| sp Q9P2E9 RRBP1_HUMAN | 3181.4504 | 694.7683  | 16472.523 |
| sp P23921 RIR1_HUMAN  | 4152.1094 | NaN       | 7716.1323 |
| sp O76021 RL1D1_HUMAN | 2088.945  | NaN       | 976.68066 |
| sp Q15404 RSU1_HUMAN  | 369.8567  | NaN       | 629.49084 |
| sp O00442 RTCA_HUMAN  | 176.10089 | NaN       | 1030.5781 |
| sp Q9Y3I0 RTCB_HUMAN  | 5755.9644 | NaN       | 4415.089  |
| sp O95197 RTN3_HUMAN  | 11535.694 | 440.0377  | 1325.446  |
| sp Q9NQC3 RTN4_HUMAN  | 20719.121 | 4547.0527 | 7306.212  |
| sp Q9Y224 RTRAF_HUMAN | 6116.193  | NaN       | 2732.7095 |
| sp Q96T51 RUFY1_HUMAN | 15810.126 | NaN       | 588.7617  |
| sp Q96GQ5 RUSF1_HUMAN | 362.89655 | NaN       | 5425.1978 |
| sp Q9Y265 RUVB1_HUMAN | 9992.995  | NaN       | 12043.266 |
| sp Q9Y230 RUVB2_HUMAN | 16099.948 | NaN       | 18185.78  |
| sp P60903 S10AA_HUMAN | 92282.86  | 1102.7336 | 4250.354  |
| sp P31949 S10AB_HUMAN | 27013.111 | 4593.724  | 9154.502  |
| sp Q99584 S10AD_HUMAN | 4198.966  | 780.01086 | 8623.509  |
| sp Q96FQ6 S10AG_HUMAN | 3704.8345 | 125.24179 | 5128.5674 |
| sp P26447 S10A4_HUMAN | 3636.7507 | NaN       | 746.0115  |
| sp P06703 S10A6_HUMAN | 12193.824 | 6515.6704 | 1950.6847 |
| sp P05109 S10A8_HUMAN | NaN       | 511.0276  | 7418.5923 |
| sp Q99500 S1PR3_HUMAN | 322.98312 | NaN       | 6211.109  |
| sp P0DJ18 SAA1_HUMAN  | 464.9658  | NaN       | 641.78534 |
| sp Q9NTJ5 SAC1_HUMAN  | 4968.3877 | 26179.436 | 5988.97   |
| sp Q9UBE0 SAE1_HUMAN  | 841.4461  | NaN       | 3158.26   |
| sp Q15424 SAFB1_HUMAN | 0         | NaN       | 777.5514  |
| sp Q9Y3Z3 SAMH1_HUMAN | 456.66055 | NaN       | 3980.855  |
| sp Q9Y512 SAM50_HUMAN | 5416.3237 | NaN       | 4602.38   |
| sp Q9NR31 SAR1A_HUMAN | 6953.4688 | 266.06992 | 4546.19   |
| sp Q9Y6B6 SAR1B_HUMAN | 10225.054 | NaN       | 394.9916  |
| sp P49591 SYSC_HUMAN  | 3869.29   | NaN       | 1354.0592 |
| sp Q9Y3A5 SBDS_HUMAN  | 3599.896  | NaN       | 3416.6943 |
| sp O95248 MTMR5_HUMAN | 691.08673 | NaN       | 1647.0948 |
| sp O15126 SCAM1_HUMAN | 3529.7036 | NaN       | 6887.6157 |

|                        |           |           |           |
|------------------------|-----------|-----------|-----------|
| sp O15127 SCAM2_HUMAN  | 2790.9016 | NaN       | 15961.094 |
| sp O14828 SCAM3_HUMAN  | 11099.589 | 404.98727 | 8057.8623 |
| sp Q969E2 SCAM4_HUMAN  | 1711.6323 | NaN       | 1896.3296 |
| sp Q6AZY7 SCAR3_HUMAN  | 2508.039  | NaN       | 2817.3865 |
| sp Q8WTV0 SCRB1_HUMAN  | 2606.0784 | NaN       | 4513.504  |
| sp Q14108 SCRB2_HUMAN  | 20680.168 | 2662.512  | 9310.329  |
| sp Q8NBX0 SCPD_L_HUMAN | 4250.4746 | NaN       | 4475.1445 |
| sp O00767 SCD_HUMAN    | 1225.4475 | NaN       | 27267.844 |
| sp Q8WVM8 SCFD1_HUMAN  | 2782.106  | NaN       | 3961.3096 |
| sp Q8WU76 SCFD2_HUMAN  | 2204.026  | NaN       | 5212.0186 |
| sp P22307 SCP2_HUMAN   | 6875.14   | 340.04123 | 657.3514  |
| sp Q9HB40 RISC_HUMAN   | 509.2613  | NaN       | 11377.579 |
| sp Q14160 SCRIB_HUMAN  | 1151.4275 | NaN       | 21722.896 |
| sp Q12765 SCRN1_HUMAN  | 3876.6274 | NaN       | 3635.146  |
| sp Q96KG9 SCYL1_HUMAN  | 1266.3711 | NaN       | 4538.438  |
| sp P18827 SDC1_HUMAN   | 2099.2837 | NaN       | 3292.1455 |
| sp P34741 SDC2_HUMAN   | 1314.2312 | NaN       | 1249.7295 |
| sp P31431 SDC4_HUMAN   | 11066.62  | NaN       | 1761.4597 |
| sp O00560 SDCB1_HUMAN  | 31463.28  | 2208.717  | 182.56757 |
| sp Q99470 SDF2_HUMAN   | 982.2352  | NaN       | 2793.4321 |
| sp Q9HCN8 SDF2L_HUMAN  | 513.147   | NaN       | 4452.4067 |
| sp Q9BRK5 CAB45_HUMAN  | 4267.3804 | NaN       | 1246.6132 |
| sp P31040 SDHA_HUMAN   | 19038.402 | NaN       | 1970.8069 |
| sp P21912 SDHB_HUMAN   | 4409.575  | 232.26935 | 335.94034 |
| sp Q99643 C560_HUMAN   | 1463.2428 | NaN       | 5323.315  |
| sp P67812 SC11A_HUMAN  | 4742.1084 | NaN       | 3691.1143 |
| sp P55735 SEC13_HUMAN  | 9612.713  | NaN       | 27804.924 |
| sp O75396 SC22B_HUMAN  | 7600.6353 | 2359.2188 | 2929.9111 |
| sp Q15436 SC23A_HUMAN  | 6988.2    | NaN       | 1252.6501 |
| sp P53992 SC24C_HUMAN  | 3032.7708 | NaN       | 30428.11  |
| sp O94855 SC24D_HUMAN  | 1215.4026 | NaN       | 5567.2827 |
| sp O94979 SC31A_HUMAN  | 6153.3867 | NaN       | 22552.062 |
| sp P61619 S61A1_HUMAN  | 10646.745 | 4780.7275 | 2622.1057 |



|                       |            |           |           |
|-----------------------|------------|-----------|-----------|
| sp P60468 SC61B_HUMAN | 4066.869   | 767.5973  | 6536.3213 |
| sp P60059 SC61G_HUMAN | 6170.945   | 811.4313  | 10193.177 |
| sp Q99442 SEC62_HUMAN | 3685.0142  | NaN       | 364.05875 |
| sp Q9UGP8 SEC63_HUMAN | 4613.634   | NaN       | 2024.3207 |
| sp Q96EE3 SEH1_HUMAN  | 1021.87103 | NaN       | NaN       |
| sp Q9UBV2 SE1L1_HUMAN | 3387.833   | NaN       | NaN       |
| sp Q13228 SBP1_HUMAN  | 2806.7402  | NaN       | NaN       |
| sp O60613 SEP15_HUMAN | 1737.4895  | NaN       | NaN       |
| sp Q8WWX9 SELM_HUMAN  | 1553.0715  | NaN       | NaN       |
| sp P62341 SELT_HUMAN  | 712.3257   | NaN       | NaN       |
| sp Q99985 SEM3C_HUMAN | 423.76743  | NaN       | NaN       |
| sp Q9P0V9 SEP10_HUMAN | 779.01227  | NaN       | NaN       |
| sp Q9NVA2 SEP11_HUMAN | 10131.884  | NaN       | NaN       |
| sp Q15019 SEPT2_HUMAN | 11523.61   | NaN       | 5149.457  |
| sp Q16181 SEPT7_HUMAN | 11503.363  | NaN       | 10145.952 |
| sp Q92599 SEPT8_HUMAN | 466.85333  | NaN       | 442.3087  |
| sp Q9UHD8 SEPT9_HUMAN | 9278.485   | NaN       | 765.9421  |
| sp Q8NC51 PAIRB_HUMAN | 4230.603   | NaN       | 10657.162 |
| sp Q9NRX5 SERC1_HUMAN | 9583.917   | 224.86775 | 5283.825  |
| sp Q96SA4 SERC2_HUMAN | 2433.3809  | NaN       | 45645.504 |
| sp Q13530 SERC3_HUMAN | 5180.532   | NaN       | 4367.527  |
| sp Q86VE9 SERC5_HUMAN | 811.4796   | NaN       | 3951.4866 |
| sp P01009 A1AT_HUMAN  | 1276.546   | 1269.2947 | 440.7256  |
| sp P01011 AACT_HUMAN  | 8094.7085  | 6380.468  | 3940.811  |
| sp P08185 CBG_HUMAN   | 766.2172   | NaN       | 1627.8778 |
| sp P05543 THBG_HUMAN  | 2515.5635  | 1093.9943 | 779.935   |
| sp P30740 ILEU_HUMAN  | 4877.8076  | NaN       | 5713.616  |
| sp P35237 SPB6_HUMAN  | 5510.3506  | NaN       | 9355.37   |
| sp P50452 SPB8_HUMAN  | 51237.406  | NaN       | 60091.36  |
| sp P01008 ANT3_HUMAN  | 22915.89   | 6219.327  | 4840.024  |
| sp P05546 HEP2_HUMAN  | 1930.9097  | NaN       | 1389.5073 |
| sp P05121 PAI1_HUMAN  | 3363.0806  | NaN       | 3051.4346 |
| sp P07093 GDN_HUMAN   | 6303.907   | 232.59033 | 6113.9243 |

|                       |           |           |           |
|-----------------------|-----------|-----------|-----------|
| sp P36955 PEDF_HUMAN  | 6540.9585 | 3166.185  | 6751.8994 |
| sp P08697 A2AP_HUMAN  | 7460.638  | 8387.982  | 4086.4282 |
| sp P05155 IC1_HUMAN   | 3183.2117 | 367.76102 | 6690.0806 |
| sp P50454 SERPH_HUMAN | 33540.9   | 4625.9307 | 3512.5046 |
| sp Q01105 SET_HUMAN   | 3380.172  | 292.93427 | 1591.2145 |
| sp Q12874 SF3A3_HUMAN | 421.2974  | NaN       | 860.02985 |
| sp O75533 SF3B1_HUMAN | 2142.1377 | NaN       | 2835.1914 |
| sp Q13435 SF3B2_HUMAN | 435.60132 | NaN       | 4424.5034 |
| sp Q15393 SF3B3_HUMAN | 7480.8306 | NaN       | 1338.4645 |
| sp Q9BWJ5 SF3B5_HUMAN | 208.22314 | NaN       | 916.1727  |
| sp Q9Y3B4 SF3B6_HUMAN | 2222.307  | NaN       | 2553.9333 |
| sp P23246 SFPQ_HUMAN  | 5146.2227 | 301.87482 | 2658.5386 |
| sp Q8N474 SFRP1_HUMAN | 1861.0431 | NaN       | 5026.171  |
| sp O95562 SFT2B_HUMAN | 650.9216  | NaN       | 9103.326  |
| sp Q9H9B4 SFXN1_HUMAN | 7211.7515 | 184.65442 | 1312.6871 |
| sp Q9BWM7 SFXN3_HUMAN | 6581.7124 | 308.65338 | 532.14923 |
| sp Q16585 SGCB_HUMAN  | 2288.5286 | NaN       | 934.9974  |
| sp Q92629 SGCD_HUMAN  | 6027.925  | NaN       | 5279.258  |
| sp O43556 SGCE_HUMAN  | 1699.2794 | NaN       | 3433.1792 |
| sp O43765 SGTA_HUMAN  | 1605.962  | NaN       | 4008.3684 |
| sp O75368 SH3L1_HUMAN | 3412.518  | NaN       | 8877.887  |
| sp Q9H299 SH3L3_HUMAN | 7362.0947 | 400.41452 | 2083.4373 |
| sp Q9P0V3 SH3B4_HUMAN | 5411.9907 | NaN       | 246.86652 |
| sp Q99961 SH3G1_HUMAN | 3265.6572 | NaN       | 8387.112  |
| sp Q9Y371 SHLB1_HUMAN | 1758.7454 | NaN       | 14001.281 |
| sp A1X283 SPD2B_HUMAN | 2562.4634 | NaN       | NaN       |
| sp P04278 SHBG_HUMAN  | 812.8499  | NaN       | NaN       |
| sp P29353 SHC1_HUMAN  | 948.5264  | NaN       | NaN       |
| sp P34897 GLYM_HUMAN  | 7203.198  | NaN       | NaN       |
| sp Q8NBJ9 SIDT2_HUMAN | 634.9611  | NaN       | NaN       |
| sp Q99720 SGMR1_HUMAN | 1523.3073 | NaN       | NaN       |
| sp Q9H173 SIL1_HUMAN  | 2805.805  | NaN       | NaN       |
| sp Q8IXJ6 SIR2_HUMAN  | 307.239   | NaN       | NaN       |

|                       |           |           |           |
|-----------------------|-----------|-----------|-----------|
| sp Q15477 SKIV2_HUMAN | 2581.372  | NaN       | NaN       |
| sp P63208 SKP1_HUMAN  | 4569.024  | NaN       | 3494.658  |
| sp Q9P270 SLAI2_HUMAN | 392.44043 | NaN       | 3983.2034 |
| sp P49281 NRAM2_HUMAN | 3058.1113 | NaN       | 391.5482  |
| sp P55011 S12A2_HUMAN | 1017.0375 | NaN       | 1636.9115 |
| sp Q9UP95 S12A4_HUMAN | 9107.341  | 1171.665  | 7509.0684 |
| sp Q9UHW9 S12A6_HUMAN | 558.8923  | NaN       | 576.29285 |
| sp Q9Y666 S12A7_HUMAN | 6843.2217 | NaN       | 252.37845 |
| sp Q9BXP2 S12A9_HUMAN | 2204.3506 | NaN       | 3232.7842 |
| sp Q13336 UT1_HUMAN   | 176.8373  | NaN       | 2001.0332 |
| sp Q8N697 S15A4_HUMAN | 328.17346 | NaN       | 2252.6533 |
| sp P53985 MOT1_HUMAN  | 4990.5327 | NaN       | 11126.196 |
| sp P36021 MOT8_HUMAN  | 3195.7385 | NaN       | 3772.4224 |
| sp O15427 MOT4_HUMAN  | 22345.486 | 906.3778  | 1325.765  |
| sp O15403 MOT7_HUMAN  | 1650.993  | NaN       | 2336.9812 |
| sp Q9NRA2 S17A5_HUMAN | 1836.7666 | NaN       | 2682.7402 |
| sp P43003 EAA1_HUMAN  | 1461.4644 | NaN       | 2324.2466 |
| sp P43007 SATT_HUMAN  | 2964.4792 | NaN       | 5916.86   |
| sp Q15758 AAAT_HUMAN  | 11720.081 | 1519.0446 | 1752.8953 |
| sp Q08357 S20A2_HUMAN | 2880.462  | NaN       | 7069.8076 |
| sp Q9UGH3 S23A2_HUMAN | 7621.3345 | NaN       | 7090.863  |
| sp P53007 TXTP_HUMAN  | 5483.147  | NaN       | 5510.6333 |
| sp Q9UBX3 DIC_HUMAN   | 1185.3826 | NaN       | 1431.4413 |
| sp Q02978 M2OM_HUMAN  | 5615.9985 | NaN       | 5296.291  |
| sp O75746 S2512_HUMAN | 3608.891  | NaN       | 1393.2396 |
| sp Q9UJS0 S2513_HUMAN | 3340.6704 | NaN       | 2754.0667 |
| sp Q9H936 GHC1_HUMAN  | 782.41125 | NaN       | 14861.201 |
| sp Q6NUK1 SCMC1_HUMAN | 8026.871  | NaN       | 6675.282  |
| sp Q00325 MPCP_HUMAN  | 18619.844 | 2651.9922 | 5143.525  |
| sp P12235 ADT1_HUMAN  | 4276.8184 | NaN       | 8553.459  |
| sp P05141 ADT2_HUMAN  | 10861.583 | NaN       | 665.68933 |
| sp P12236 ADT3_HUMAN  | 24970.6   | 3370.8901 | 2323.2039 |
| sp Q86WA9 S2611_HUMAN | 673.15186 | NaN       | 13964.639 |

|                       |           |           |           |
|-----------------------|-----------|-----------|-----------|
| sp P50443 S26A2_HUMAN | 1740.3625 | 1124.3402 | 5493.993  |
| sp Q6P1M0 S27A4_HUMAN | 6370.594  | NaN       | 5510.138  |
| sp Q99808 S29A1_HUMAN | 562.33856 | NaN       | 1447.5725 |
| sp P11166 GTR1_HUMAN  | 18050.031 | 548.1961  | 11143.561 |
| sp O95528 GTR10_HUMAN | 1986.4132 | NaN       | 13458.224 |
| sp P11169 GTR3_HUMAN  | 1263.5067 | NaN       | 524.00433 |
| sp Q9UGQ3 GTR6_HUMAN  | 1751.0219 | NaN       | 13412.041 |
| sp Q9Y6M5 ZNT1_HUMAN  | 4271.3794 | NaN       | 3081.2483 |
| sp Q6NXT4 ZNT6_HUMAN  | 771.6015  | NaN       | 1081.5894 |
| sp Q8NEW0 ZNT7_HUMAN  | 5889.1562 | NaN       | 1398.4801 |
| sp O15431 COPT1_HUMAN | 535.41534 | NaN       | 588.19684 |
| sp O00400 ACATN_HUMAN | 1321.9915 | NaN       | 2323.3464 |
| sp P78381 S35A2_HUMAN | 461.99368 | NaN       | 3814.1138 |
| sp P78383 S35B1_HUMAN | 722.24774 | NaN       | 4727.829  |
| sp Q8TB61 S35B2_HUMAN | 4222.1816 | 1481.5864 | 10288.116 |
| sp Q96A29 FUCT1_HUMAN | 681.4044  | NaN       | 1078.83   |
| sp Q9NTN3 S35D1_HUMAN | 0         | NaN       | 3620.3274 |
| sp Q96K37 S35E1_HUMAN | 312.22397 | NaN       | 2368.2737 |
| sp Q8N357 S35F6_HUMAN | 4129.805  | NaN       | 1749.4014 |
| sp Q7Z2H8 S36A1_HUMAN | 180.22464 | NaN       | 12751.957 |
| sp Q9H2H9 S38A1_HUMAN | 532.44135 | NaN       | 624.26587 |
| sp Q96QD8 S38A2_HUMAN | 28594.68  | 190.4887  | 2287.366  |
| sp Q9NVC3 S38A7_HUMAN | 7850.1226 | NaN       | 7960.71   |
| sp Q8NBW4 S38A9_HUMAN | 180.3038  | NaN       | 844.80615 |
| sp Q9NY26 S39A1_HUMAN | 535.6507  | NaN       | 5133.636  |
| sp Q9ULF5 S39AA_HUMAN | 731.74054 | NaN       | 2445.2244 |
| sp Q15043 S39AE_HUMAN | 2159.6006 | NaN       | 1198.593  |
| sp Q13433 S39A6_HUMAN | 468.3969  | NaN       | 5270.0522 |
| sp Q92504 S39A7_HUMAN | 974.878   | NaN       | 6408.806  |
| sp P08195 4F2_HUMAN   | 15370.587 | 531.0811  | 223.20605 |
| sp Q8WWI5 CTL1_HUMAN  | 7379.7407 | NaN       | 4214.4175 |
| sp Q8IWA5 CTL2_HUMAN  | 5628.0405 | NaN       | 9950.841  |
| sp Q96SL1 DIRC2_HUMAN | 198.46008 | NaN       | 1240.9338 |

|                       |           |           |           |
|-----------------------|-----------|-----------|-----------|
| sp P04920 B3A2_HUMAN  | 2462.14   | NaN       | 2597.1086 |
| sp Q9Y6R1 S4A4_HUMAN  | 2685.1995 | NaN       | 619.747   |
| sp Q9Y6M7 S4A7_HUMAN  | 2673.7988 | NaN       | 3062.2234 |
| sp Q9HAB3 S52A2_HUMAN | 564.9302  | NaN       | 441.04965 |
| sp P53794 SC5A3_HUMAN | 2793.0796 | NaN       | 1243.3962 |
| sp Q9Y289 SC5A6_HUMAN | 2866.4617 | NaN       | 5715.3374 |
| sp P31641 SC6A6_HUMAN | 1951.7549 | NaN       | 2106.164  |
| sp P30825 CTR1_HUMAN  | 4904.1514 | NaN       | 13993.649 |
| sp Q9UPY5 XCT_HUMAN   | 265.96082 | NaN       | 6076.9893 |
| sp Q01650 LAT1_HUMAN  | 2075.757  | NaN       | 738.8967  |
| sp P19634 SL9A1_HUMAN | 3887.8557 | NaN       | NaN       |
| sp O14745 NHRF1_HUMAN | 2255.9456 | NaN       | NaN       |
| sp Q15599 NHRF2_HUMAN | 574.63257 | NaN       | NaN       |
| sp Q92581 SL9A6_HUMAN | 249.79054 | NaN       | NaN       |
| sp Q8IVB4 SL9A9_HUMAN | 434.20032 | NaN       | NaN       |
| sp Q9GZT3 SLIRP_HUMAN | 2558.6165 | NaN       | NaN       |
| sp Q9H2G2 SLK_HUMAN   | 1989.7104 | NaN       | NaN       |
| sp P84022 SMAD3_HUMAN | 1197.4775 | NaN       | NaN       |
| sp O95347 SMC2_HUMAN  | 3070.4417 | NaN       | NaN       |
| sp Q9UQE7 SMC3_HUMAN  | 4982.483  | NaN       | 2022.1755 |
| sp Q9NTJ3 SMC4_HUMAN  | 3045.6963 | NaN       | 23301.479 |
| sp P17405 ASM_HUMAN   | 494.83026 | NaN       | 5577.848  |
| sp P52788 SPSY_HUMAN  | 2325.8599 | NaN       | 3030.531  |
| sp Q9HAU4 SMUF2_HUMAN | 1334.3507 | NaN       | 3390.3022 |
| sp O00161 SNP23_HUMAN | 5254.4185 | NaN       | 98.96532  |
| sp Q7KZF4 SND1_HUMAN  | 46797.12  | 402.47406 | 10055.855 |
| sp O75643 U520_HUMAN  | 2284.253  | NaN       | 3285.0212 |
| sp P08621 RU17_HUMAN  | 1698.0295 | NaN       | 3177.2258 |
| sp P14678 RSMB_HUMAN  | 2280.8428 | NaN       | 700.6644  |
| sp P08579 RU2B_HUMAN  | 621.4696  | NaN       | 248.5868  |
| sp P09234 RU1C_HUMAN  | 431.6831  | NaN       | 5008.0845 |
| sp P62314 SMD1_HUMAN  | 798.85223 | NaN       | 808.81744 |
| sp P62316 SMD2_HUMAN  | 2122.369  | 364.7207  | 8945.632  |

|                       |           |           |           |
|-----------------------|-----------|-----------|-----------|
| sp P62318 SMD3_HUMAN  | 2317.4795 | NaN       | 195.10353 |
| sp P62304 RUXE_HUMAN  | 398.25235 | NaN       | 274.89136 |
| sp P62306 RUXF_HUMAN  | 248.73996 | NaN       | 13475.928 |
| sp Q13884 SNTB1_HUMAN | 708.2234  | NaN       | 7385.354  |
| sp Q13425 SNTB2_HUMAN | 6832.227  | NaN       | 14065.923 |
| sp Q13596 SNX1_HUMAN  | 5440.5635 | NaN       | 2651.4148 |
| sp Q9UMY4 SNX12_HUMAN | 281.42184 | NaN       | 5789.9644 |
| sp Q15036 SNX17_HUMAN | 6054.5093 | 182.01439 | 1278.102  |
| sp Q96RF0 SNX18_HUMAN | 3809.4883 | NaN       | 3449.2073 |
| sp O60749 SNX2_HUMAN  | 2482.0024 | NaN       | 5112.7603 |
| sp Q96L92 SNX27_HUMAN | 1700.2567 | NaN       | 4729.919  |
| sp O60493 SNX3_HUMAN  | 4729.3794 | NaN       | 2157.9155 |
| sp O95219 SNX4_HUMAN  | 271.18585 | NaN       | 1560.7627 |
| sp Q9Y5X3 SNX5_HUMAN  | 4707.3726 | NaN       | 4062.026  |
| sp Q9UNH7 SNX6_HUMAN  | 3686.1636 | NaN       | 2885.741  |
| sp Q9Y5X1 SNX9_HUMAN  | 4644.7695 | NaN       | 492.2527  |
| sp P35610 SOAT1_HUMAN | 3083.6667 | NaN       | 2820.9382 |
| sp P00441 SODC_HUMAN  | 8859.436  | 1260.1687 | 3304.5203 |
| sp P04179 SODM_HUMAN  | 5744.496  | 5886.9814 | 4698.8213 |
| sp P18583 SON_HUMAN   | 312.98712 | 549.37335 | 36707.28  |
| sp Q00796 DHSD_HUMAN  | 1013.3214 | NaN       | 231.11508 |
| sp Q99523 SORT_HUMAN  | 604.61414 | NaN       | 10689.189 |
| sp O60271 JIP4_HUMAN  | 130.42772 | NaN       | 5965.2065 |
| sp P09486 SPRC_HUMAN  | 21320.69  | 551.6525  | 1563.532  |
| sp Q8NB90 SPAT5_HUMAN | 498.28494 | NaN       | 4078.1072 |
| sp Q9NUQ6 SPS2L_HUMAN | 467.72354 | NaN       | 4921.6245 |
| sp Q8NBT2 SPC24_HUMAN | 260.26138 | NaN       | 1929.2556 |
| sp Q9Y6A9 SPCS1_HUMAN | 830.3478  | 697.87524 | 416.0637  |
| sp Q15005 SPCS2_HUMAN | 6439.0894 | 566.1082  | 501.39178 |
| sp P61009 SPCS3_HUMAN | 759.3924  | NaN       | 542.2241  |
| sp Q9NZD8 SPG21_HUMAN | 2409.8594 | NaN       | 1334.0471 |
| sp Q9H2V7 SPNS1_HUMAN | 2001.7747 | NaN       | NaN       |
| sp P10451 OSTP_HUMAN  | 348.7325  | NaN       | NaN       |

|                       |           |           |           |
|-----------------------|-----------|-----------|-----------|
| sp Q13103 SPP24_HUMAN | 856.8534  | NaN       | NaN       |
| sp Q8TCT8 SPP2A_HUMAN | 5080.7295 | NaN       | NaN       |
| sp P35270 SPRE_HUMAN  | 366.7018  | NaN       | NaN       |
| sp Q5W111 SPRY7_HUMAN | 1109.0303 | NaN       | NaN       |
| sp Q13813 SPTN1_HUMAN | 9676.444  | NaN       | NaN       |
| sp Q01082 SPTB2_HUMAN | 8887.737  | NaN       | NaN       |
| sp O15269 SPTC1_HUMAN | 8698.762  | NaN       | NaN       |
| sp O15270 SPTC2_HUMAN | 2561.5376 | NaN       | 844.157   |
| sp Q14534 ERG1_HUMAN  | 1309.5537 | NaN       | 6555.7397 |
| sp Q9Y6N5 SQOR_HUMAN  | 3399.5186 | 3808.116  | 1582.3401 |
| sp Q13501 SQSTM_HUMAN | 49588.6   | 4481.2764 | 2500.9353 |
| sp P12931 SRC_HUMAN   | 656.08875 | NaN       | 957.08105 |
| sp O75044 SRGP2_HUMAN | 813.98895 | NaN       | 509.15927 |
| sp P30626 SORCN_HUMAN | 7595.309  | 723.2042  | 479.68616 |
| sp P19623 SPEE_HUMAN  | 7099.562  | NaN       | 284.78412 |
| sp P37108 SRP14_HUMAN | 1513.5931 | 455.50705 | 1350.4141 |
| sp P09132 SRP19_HUMAN | 1213.0486 | NaN       | 4272.6816 |
| sp P61011 SRP54_HUMAN | 74537.86  | NaN       | 1199.6968 |
| sp Q9UHB9 SRP68_HUMAN | 4026.9102 | NaN       | 2153.603  |
| sp O76094 SRP72_HUMAN | 21546.846 | NaN       | 2583.783  |
| sp P49458 SRP09_HUMAN | 2819.8916 | NaN       | 5706.0054 |
| sp P78362 SRPK2_HUMAN | 2020.4766 | NaN       | 63.259575 |
| sp P08240 SRPRA_HUMAN | 3372.522  | NaN       | 341.08276 |
| sp Q9Y5M8 SRPRB_HUMAN | 7069.07   | 237.54823 | 11529.025 |
| sp Q9GZT4 SRR_HUMAN   | 1331.0757 | NaN       | 3298.5884 |
| sp Q07955 SRSF1_HUMAN | 7845.68   | NaN       | 3002.3523 |
| sp O75494 SRS10_HUMAN | 430.71503 | NaN       | 34725.85  |
| sp Q01130 SRSF2_HUMAN | 2940.0488 | NaN       | 4100.102  |
| sp P84103 SRSF3_HUMAN | 3068.8591 | NaN       | 7927.3105 |
| sp Q13243 SRSF5_HUMAN | 338.76297 | NaN       | 5533.3726 |
| sp Q13247 SRSF6_HUMAN | 1126.8022 | NaN       | 792.7153  |
| sp Q16629 SRSF7_HUMAN | 33339.66  | 7035.465  | 4524.6357 |
| sp Q9BYN0 SRXN1_HUMAN | 169.05779 | NaN       | 3402.2058 |

|                       |           |           |            |
|-----------------------|-----------|-----------|------------|
| sp P05455 LA_HUMAN    | 3531.8875 | 343.59094 | 6144.0977  |
| sp Q04837 SSBP_HUMAN  | 5702.9927 | 634.8233  | 1751.0488  |
| sp P43307 SSRA_HUMAN  | 3660.5479 | 1020.7565 | 263.68124  |
| sp Q9UNL2 SSRG_HUMAN  | 3259.7402 | NaN       | 2284.07    |
| sp P51571 SSRD_HUMAN  | 21382.887 | 472.51807 | 165.24472  |
| sp Q08945 SSRP1_HUMAN | 658.5907  | NaN       | 1693.2693  |
| sp P50502 F10A1_HUMAN | 5194.1426 | 396.07126 | 6508.8345  |
| sp Q92783 STAM1_HUMAN | 2576.832  | NaN       | 215.18008  |
| sp P42224 STAT1_HUMAN | 7139.6987 | 815.41675 | 2547.945   |
| sp P52630 STAT2_HUMAN | 5024.374  | NaN       | NaN        |
| sp P40763 STAT3_HUMAN | 3522.5933 | NaN       | NaN        |
| sp P42226 STAT6_HUMAN | 356.9665  | NaN       | NaN        |
| sp Q9UHE8 STEA1_HUMAN | 2677.9446 | NaN       | NaN        |
| sp Q8NFT2 STEA2_HUMAN | 1759.2714 | NaN       | NaN        |
| sp Q658P3 STEA3_HUMAN | 2061.2778 | NaN       | NaN        |
| sp Q13586 STIM1_HUMAN | 2039.3489 | NaN       | NaN        |
| sp Q86WV6 STING_HUMAN | 2413.3374 | NaN       | NaN        |
| sp P31948 STIP1_HUMAN | 6148.3965 | NaN       | NaN        |
| sp Q9Y6E0 STK24_HUMAN | 6248.9966 | NaN       | 7870.5254  |
| sp Q9BXU1 STK31_HUMAN | NaN       | 151.38249 | 4320.27    |
| sp Q9UEW8 STK39_HUMAN | 3924.118  | NaN       | 7174.648   |
| sp P16949 STMN1_HUMAN | 5039.55   | 504.83316 | 519.69666  |
| sp P27105 STOM_HUMAN  | 36903.887 | 6879.1963 | 1008.24414 |
| sp Q9UJZ1 STML2_HUMAN | 7391.854  | 569.84546 | 3147.3877  |
| sp Q8WXE9 STON2_HUMAN | NaN       | 885.05383 | 590.4879   |
| sp Q9Y3F4 STRAP_HUMAN | 6553.5195 | NaN       | 11943.523  |
| sp Q5VSL9 STRP1_HUMAN | 1821.3947 | NaN       | 2868.4192  |
| sp O43815 STRN_HUMAN  | 381.51202 | NaN       | 4558.947   |
| sp Q13033 STRN3_HUMAN | 1414.6193 | NaN       | 3673.1658  |
| sp P46977 STT3A_HUMAN | 7927.067  | 707.37134 | 892.94617  |
| sp Q8TCJ2 STT3B_HUMAN | 4290.1562 | NaN       | NaN        |
| sp Q9UNE7 CHIP_HUMAN  | 3094.7444 | NaN       | NaN        |
| sp Q86Y82 STX12_HUMAN | 7600.949  | NaN       | NaN        |



|                       |           |           |           |
|-----------------------|-----------|-----------|-----------|
| sp P32856 STX2_HUMAN  | 1628.2625 | NaN       | NaN       |
| sp Q12846 STX4_HUMAN  | 2689.0857 | NaN       | NaN       |
| sp Q13190 STX5_HUMAN  | 415.174   | NaN       | NaN       |
| sp O43752 STX6_HUMAN  | 2492.043  | NaN       | NaN       |
| sp O15400 STX7_HUMAN  | 2827.4739 | NaN       | NaN       |
| sp Q9UNK0 STX8_HUMAN  | 5894.42   | NaN       | NaN       |
| sp P61764 STXB1_HUMAN | 1574.6335 | NaN       | 7001.9946 |
| sp O00186 STXB3_HUMAN | 16162.716 | NaN       | 18781.72  |
| sp Q5T5C0 STXB5_HUMAN | 146.29073 | NaN       | 4167.807  |
| sp P53999 TCP4_HUMAN  | 6563.41   | NaN       | 10815.1   |
| sp Q9P2R7 SUCB1_HUMAN | 4477.0093 | NaN       | 4191.1484 |
| sp P53597 SUCA_HUMAN  | 3479.831  | 316.64752 | 531.2108  |
| sp Q96I99 SUCB2_HUMAN | 6193.581  | NaN       | 3704.7249 |
| sp Q9Y2Z0 SGT1_HUMAN  | 2699.1016 | NaN       | 10043.548 |
| sp Q8NBK3 SUMF1_HUMAN | 645.7257  | 217.10643 | 2901.513  |
| sp Q8NBK7 SUMF2_HUMAN | 4757.639  | NaN       | 18081.955 |
| sp G2XKQ0 SUMO5_HUMAN | 843.8776  | NaN       | 1149.013  |
| sp P61956 SUMO2_HUMAN | 0         | 322.3055  | 819.14233 |
| sp Q9UH99 SUN2_HUMAN  | 1324.566  | 262.11914 | 287.84235 |
| sp Q9Y5B9 SP16H_HUMAN | 1991.3204 | NaN       | 1016.5179 |
| sp Q15526 SURF1_HUMAN | 267.69922 | NaN       | 3711.4238 |
| sp O15260 SURF4_HUMAN | 19873.55  | 662.3069  | 2610.1892 |
| sp Q7L0J3 SV2A_HUMAN  | 1083.005  | NaN       | 1331.2095 |
| sp Q96A49 SYAP1_HUMAN | 1250.9813 | NaN       | 6240.935  |
| sp P17600 SYN1_HUMAN  | NaN       | 3357.2417 | 2870.0808 |
| sp O60506 HNRPQ_HUMAN | 28291.088 | 402.2048  | 9161.783  |
| sp O43760 SNG2_HUMAN  | 1240.8555 | NaN       | 319.32965 |
| sp P57105 SYJ2B_HUMAN | 2020.7914 | NaN       | 1017.057  |
| sp Q16563 SYPL1_HUMAN | 11929.417 | 419.379   | 870.0491  |
| sp Q9BT88 SYT11_HUMAN | 3106.7393 | NaN       | 833.8847  |
| sp Q9HCH5 SYTL2_HUMAN | 342.86942 | NaN       | 225.69643 |
| sp Q86TM6 SYVN1_HUMAN | 2457.2402 | NaN       | 1172.6517 |
| sp O75410 TACC1_HUMAN | 260.97388 | NaN       | 3199.922  |

|                       |           |           |           |
|-----------------------|-----------|-----------|-----------|
| sp Q92804 RBP56_HUMAN | 733.1062  | NaN       | 2309.9287 |
| sp Q01995 TAGL_HUMAN  | 14304.804 | 2467.9956 | 1085.9568 |
| sp P37802 TAGL2_HUMAN | 10690.254 | 3033.1597 | 1539.4985 |
| sp P37837 TALDO_HUMAN | 19627.934 | 1111.3342 | 352.93488 |
| sp Q9C0D5 TANC1_HUMAN | 389.42123 | NaN       | 2122.4875 |
| sp Q7L7X3 TAOK1_HUMAN | 932.4434  | NaN       | 2169.5874 |
| sp Q03518 TAP1_HUMAN  | 3076.0596 | NaN       | 948.7225  |
| sp Q03519 TAP2_HUMAN  | 2159.0635 | NaN       | 1709.6033 |
| sp O15533 TPSN_HUMAN  | 5449.442  | NaN       | 1750.3434 |
| sp Q13148 TADBP_HUMAN | 2603.337  | NaN       | 64.74302  |
| sp P26639 SYTC_HUMAN  | 11493.633 | NaN       | 10576.389 |
| sp Q86VP1 TAXB1_HUMAN | 4685.7744 | NaN       | 1314.7953 |
| sp O14907 TX1B3_HUMAN | 3399.483  | NaN       | 764.63965 |
| sp Q4KMP7 TB10B_HUMAN | 641.6726  | NaN       | NaN       |
| sp Q8TC07 TBC15_HUMAN | 2476.9397 | NaN       | NaN       |
| sp Q9HA65 TBC17_HUMAN | 1335.6978 | NaN       | NaN       |
| sp Q96BZ9 TBC20_HUMAN | 833.3102  | NaN       | NaN       |
| sp Q92609 TBCD5_HUMAN | 589.07654 | NaN       | NaN       |
| sp Q66K14 TBC9B_HUMAN | 5453.064  | NaN       | NaN       |
| sp O75347 TBCA_HUMAN  | 2547.0488 | NaN       | NaN       |
| sp Q99426 TBCB_HUMAN  | 4807.628  | NaN       | NaN       |
| sp Q9BTW9 TBCD_HUMAN  | 7841.4854 | NaN       | NaN       |
| sp Q15813 TBCE_HUMAN  | 479.34338 | NaN       | 4413.904  |
| sp Q9UHD2 TBK1_HUMAN  | 2311.6316 | NaN       | 874.52783 |
| sp Q9Y4P3 TBL2_HUMAN  | 774.1944  | NaN       | 2068.2622 |
| sp Q969Z0 FAKD4_HUMAN | 170.09085 | NaN       | 2048.5618 |
| sp Q9Y4C2 TCAF1_HUMAN | 606.9607  | NaN       | 3628.3008 |
| sp Q13488 VPP3_HUMAN  | 36042.055 | 276.07654 | 1592.9093 |
| sp P17987 TCPA_HUMAN  | 13611.827 | 640.0692  | 2193.507  |
| sp Q9NZ01 TECR_HUMAN  | 8712.148  | 271.0785  | 1491.0101 |
| sp Q9UGI8 TES_HUMAN   | 735.4565  | NaN       | 1321.8021 |
| sp Q9Y6I9 TX264_HUMAN | 1245.8534 | NaN       | 2926.1965 |
| sp P02787 TRFE_HUMAN  | 6711.938  | 5989.5854 | 1822.0724 |

|                       |           |           |           |
|-----------------------|-----------|-----------|-----------|
| sp Q9H5Q4 TFB2M_HUMAN | 477.20575 | NaN       | 839.4948  |
| sp Q92734 TFG_HUMAN   | 6034.677  | NaN       | 3855.904  |
| sp P48307 TFPI2_HUMAN | 7324.827  | 472.3609  | 3189.544  |
| sp P02786 TFR1_HUMAN  | 25353.617 | 2099.5073 | 8163.347  |
| sp P01137 TGFB1_HUMAN | 1241.4624 | NaN       | 4464.734  |
| sp P61812 TGFB2_HUMAN | 1985.8401 | NaN       | 3774.1948 |
| sp Q15582 BGH3_HUMAN  | 5796.3667 | 2137.7737 | 638.3429  |
| sp P36897 TGFR1_HUMAN | 3260.6719 | NaN       | 1039.6765 |
| sp P37173 TGFR2_HUMAN | 1989.522  | NaN       | 6654.5225 |
| sp P21980 TGM2_HUMAN  | 9636.636  | NaN       | 1436.8542 |
| sp O43493 TGON2_HUMAN | 1673.2148 | NaN       | 1541.9839 |
| sp P07996 TSP1_HUMAN  | 15662.861 | 1844.2318 | 745.99634 |
| sp P35442 TSP2_HUMAN  | 2326.5183 | NaN       | 164.96051 |
| sp P49746 TSP3_HUMAN  | 141.48639 | NaN       | 9498.515  |
| sp P35443 TSP4_HUMAN  | 3780.7703 | 631.1025  | 5104.5093 |
| sp Q8WUY1 THEM6_HUMAN | 1413.8204 | NaN       | 2888.5923 |
| sp P52888 THOP1_HUMAN | 3309.2393 | NaN       | 1026.4028 |
| sp Q9Y2W1 TR150_HUMAN | 348.4969  | NaN       | 2778.0227 |
| sp Q9NXG2 THUM1_HUMAN | 2099.2974 | NaN       | 7314.7827 |
| sp P04216 THY1_HUMAN  | 16701.29  | 980.50134 | 485.48627 |
| sp P62072 TIM10_HUMAN | 390.65833 | NaN       | 3209.3875 |
| sp O14925 TIM23_HUMAN | 3434.2505 | NaN       | 163.47676 |
| sp O43615 TIM44_HUMAN | 1477.8414 | NaN       | 7558.4575 |
| sp Q3ZCQ8 TIM50_HUMAN | 1378.3943 | NaN       | 10370.796 |
| sp Q9Y5J7 TIM9_HUMAN  | 829.84094 | NaN       | 872.5303  |
| sp P01033 TIMP1_HUMAN | 5291.861  | 892.914   | 6389.958  |
| sp P16035 TIMP2_HUMAN | 2239.3962 | 957.46545 | 564.5159  |
| sp P35625 TIMP3_HUMAN | 10575.949 | NaN       | 1235.7955 |
| sp O75663 TIPRL_HUMAN | 807.9685  | NaN       | 5001.3413 |
| sp Q07157 ZO1_HUMAN   | 702.5068  | NaN       | 1519.0061 |
| sp Q9UDY2 ZO2_HUMAN   | 1788.7968 | NaN       | 1937.853  |
| sp P29401 TKT_HUMAN   | 11386.264 | 1422.9564 | 431.4803  |
| sp Q9Y490 TLN1_HUMAN  | 10377.649 | 1406.583  | 4725.1265 |

|                       |            |           |           |
|-----------------------|------------|-----------|-----------|
| sp Q9Y4G6 TLN2_HUMAN  | 570.00305  | NaN       | 2242.6558 |
| sp P30408 T4S1_HUMAN  | 1666.1056  | NaN       | 487.0753  |
| sp Q9NS93 TM7S3_HUMAN | 695.6002   | NaN       | 2178.8896 |
| sp O15321 TM9S1_HUMAN | 2676.458   | NaN       | 1166.8267 |
| sp Q99805 TM9S2_HUMAN | 13194.473  | 187.69781 | 608.68665 |
| sp Q9HD45 TM9S3_HUMAN | 9253.737   | NaN       | 946.23413 |
| sp Q92544 TM9S4_HUMAN | 4742.1733  | NaN       | 1230.9755 |
| sp Q969X1 LFG3_HUMAN  | 7798.635   | 477.05634 | 1542.6443 |
| sp P55061 BI1_HUMAN   | 286.44635  | NaN       | 8213.341  |
| sp Q9UM00 TMCO1_HUMAN | 750.11066  | NaN       | 9742.315  |
| sp Q13445 TMED1_HUMAN | 1859.426   | NaN       | 1467.8538 |
| sp P49755 TMEDA_HUMAN | 16981.027  | 1783.6448 | 624.75635 |
| sp Q15363 TMED2_HUMAN | 9922.189   | 610.50964 | 16434.17  |
| sp Q9Y3Q3 TMED3_HUMAN | 1219.8894  | NaN       | 6601.9673 |
| sp Q7Z7H5 TMED4_HUMAN | 5072.085   | 298.18304 | 4206.564  |
| sp Q9Y3A6 TMED5_HUMAN | 2707.517   | NaN       | 11880.109 |
| sp Q9Y3B3 TMED7_HUMAN | 11850.765  | 427.52927 | 1435.9545 |
| sp Q9BVK6 TMED9_HUMAN | 13477.714  | 947.6651  | 7473.099  |
| sp Q8NE00 TM104_HUMAN | 749.8747   | NaN       | 3319.3823 |
| sp Q9NUM4 T106B_HUMAN | 3669.1377  | NaN       | 370.68988 |
| sp Q9BVX2 T106C_HUMAN | 899.76     | NaN       | 5385.4355 |
| sp Q9BVC6 TM109_HUMAN | 6187.0527  | 577.485   | 5450.279  |
| sp P17152 TMM11_HUMAN | 262.20792  | NaN       | 3159.6257 |
| sp Q12893 TM115_HUMAN | 1158.5723  | NaN       | 470.05972 |
| sp Q4V9L6 TM119_HUMAN | 1002.52386 | NaN       | 273.78342 |
| sp Q8N131 PORIM_HUMAN | 1130.4834  | NaN       | 651.3829  |
| sp Q9H061 T126A_HUMAN | 705.41565  | NaN       | 2187.3599 |
| sp O75204 TM127_HUMAN | 2999.6792  | NaN       | 209.46596 |
| sp Q9NPI0 TM138_HUMAN | 288.82764  | NaN       | 4992.5845 |
| sp Q9BVK8 TM147_HUMAN | 465.28058  | NaN       | NaN       |
| sp Q9P0S9 TM14C_HUMAN | 1609.8119  | NaN       | NaN       |
| sp Q9HC07 TM165_HUMAN | 12300.452  | NaN       | NaN       |
| sp Q8TBQ9 KISHA_HUMAN | 1450.274   | NaN       | NaN       |

|                       |           |           |           |
|-----------------------|-----------|-----------|-----------|
| sp Q9BSA9 TM175_HUMAN | 2268.0151 | NaN       | NaN       |
| sp Q7Z7N9 T179B_HUMAN | 764.88715 | NaN       | NaN       |
| sp Q9P2C4 TM181_HUMAN | 529.64734 | NaN       | NaN       |
| sp Q8IY95 TM192_HUMAN | 4093.5857 | NaN       | NaN       |
| sp Q86VY9 T200A_HUMAN | 353.4729  | NaN       | NaN       |
| sp Q6UW68 TM205_HUMAN | 2214.2568 | NaN       | 2405.909  |
| sp Q6NUQ4 TM214_HUMAN | 1801.9939 | NaN       | 5514.9585 |
| sp Q9H0R3 TM222_HUMAN | 2507.479  | NaN       | 1323.7227 |
| sp Q96A57 TM230_HUMAN | 857.37885 | NaN       | 3493.261  |
| sp Q96Q45 TM237_HUMAN | 1767.1561 | NaN       | 18232.996 |
| sp Q9H330 TM245_HUMAN | 950.3361  | NaN       | 2389.4275 |
| sp Q9NWD8 TM248_HUMAN | 400.98364 | NaN       | 11777.599 |
| sp Q8WUH6 TM263_HUMAN | 294.15622 | NaN       | 612.8353  |
| sp Q9NV96 CC50A_HUMAN | 6512.669  | NaN       | 1783.7312 |
| sp P57088 TMM33_HUMAN | 12181.832 | 174.09483 | 4142.043  |
| sp Q9BTV4 TMM43_HUMAN | 18558.977 | 690.91327 | 13850.481 |
| sp O95807 TM50A_HUMAN | 2775.5957 | NaN       | 2280.7087 |
| sp P56557 TM50B_HUMAN | 77.799995 | NaN       | 1096.3174 |
| sp Q9BXS4 TMM59_HUMAN | 36382.34  | NaN       | 2429.304  |
| sp Q5T3F8 CSCL2_HUMAN | 486.4774  | NaN       | 4336.352  |
| sp Q6PI78 TMM65_HUMAN | 1836.5953 | NaN       | 7515.599  |
| sp Q9BUB7 TMM70_HUMAN | 1516.6381 | NaN       | 11919.875 |
| sp Q8NBN3 TM87A_HUMAN | 3346.9636 | NaN       | 221.02069 |
| sp Q96K49 TM87B_HUMAN | 614.79736 | NaN       | 12458.643 |
| sp Q9NZR1 TMOD2_HUMAN | 1296.4128 | NaN       | 660.4746  |
| sp Q9NYL9 TMOD3_HUMAN | 21327.707 | NaN       | 10201.075 |
| sp P42166 LAP2A_HUMAN | 3074.7573 | NaN       | 6437.7554 |
| sp P42167 LAP2B_HUMAN | 927.2241  | NaN       | 730.2574  |
| sp P63313 TYB10_HUMAN | 10468.491 | 3026.3325 | 880.6911  |
| sp P62328 TYB4_HUMAN  | 14339.695 | 2888.7712 | 1394.0293 |
| sp Q6ZXV5 TMTC3_HUMAN | 1862.5264 | NaN       | 476.23782 |
| sp Q9H3N1 TMX1_HUMAN  | 9900.606  | 369.7801  | 4409.9873 |
| sp Q9Y320 TMX2_HUMAN  | 5318.16   | NaN       | 1776.3792 |

|                        |            |           |           |
|------------------------|------------|-----------|-----------|
| sp Q96JJ7 TMX3_HUMAN   | 10729.4375 | NaN       | 3692.6035 |
| sp Q9H1E5 TMX4_HUMAN   | 1044.6823  | NaN       | NaN       |
| sp O95379 TFIP8_HUMAN  | 756.82904  | NaN       | NaN       |
| sp O14763 TR10B_HUMAN  | 2979.6443  | NaN       | NaN       |
| sp Q9UBN6 TR10D_HUMAN  | 720.6673   | NaN       | NaN       |
| sp Q9NP84 TNR12_HUMAN  | 757.8694   | NaN       | NaN       |
| sp Q9NS68 TNR19_HUMAN  | 1045.0615  | NaN       | NaN       |
| sp P19438 TNR1A_HUMAN  | 556.83344  | NaN       | NaN       |
| sp Q9C0C2 TB182_HUMAN  | 1945.9023  | NaN       | NaN       |
| sp Q92973 TNPO1_HUMAN  | 8157.0244  | NaN       | NaN       |
| sp O14787 TNPO2_HUMAN  | 2373.3655  | NaN       | 10841.203 |
| sp Q9Y5L0 TNPO3_HUMAN  | 1369.5192  | NaN       | 10496.62  |
| sp Q68CZ2 TENS3_HUMAN  | 2364.4075  | NaN       | 528.5074  |
| sp Q9H0E2 TOLIP_HUMAN  | 1201.3     | NaN       | 7922.5996 |
| sp O60784 TOM1_HUMAN   | 3278.4336  | NaN       | 754.8112  |
| sp O75674 TM1L1_HUMAN  | 911.4641   | NaN       | 1640.9885 |
| sp Q6ZVM7 TM1L2_HUMAN  | 0          | NaN       | 13090.376 |
| sp Q9NS69 TOM22_HUMAN  | 1971.8872  | 170.61798 | 814.19226 |
| sp Q15785 TOM34_HUMAN  | 1507.3245  | NaN       | 1234.2585 |
| sp O96008 TOM40_HUMAN  | 6202.6426  | NaN       | 4076.1858 |
| sp Q969M1 TM40L_HUMAN  | 753.3629   | NaN       | 3504.661  |
| sp Q9P0U1 TOM7_HUMAN   | 0          | NaN       | 16525.38  |
| sp O94826 TOM70_HUMAN  | 4124.97    | NaN       | 9814.484  |
| sp P11387 TOP1_HUMAN   | 5631.683   | NaN       | 2240.063  |
| sp Q02880 TOP2B_HUMAN  | 2412.5886  | NaN       | NaN       |
| sp O14656 TOR1A_HUMAN  | 6377.4355  | NaN       | NaN       |
| sp Q5JTV8 TOIP1_HUMAN  | 2654.0654  | NaN       | NaN       |
| sp Q8NFAQ8 TOIP2_HUMAN | 2748.9456  | NaN       | NaN       |
| sp O14657 TOR1B_HUMAN  | 3296.6543  | NaN       | NaN       |
| sp Q9NXH8 TOR4A_HUMAN  | 1818.7006  | NaN       | NaN       |
| sp Q53FA7 QORX_HUMAN   | 938.72925  | NaN       | NaN       |
| sp Q13641 TPBG_HUMAN   | 12726.603  | NaN       | NaN       |
| sp Q9ULQ1 TPC1_HUMAN   | 287.60126  | NaN       | NaN       |

|                       |           |           |            |
|-----------------------|-----------|-----------|------------|
| sp O43399 TPD54_HUMAN | 6851.4136 | NaN       | 3261.9226  |
| sp P60174 TPIS_HUMAN  | 28801.41  | 3458.0676 | 3616.6436  |
| sp P09493 TPM1_HUMAN  | 1848.1886 | NaN       | 830.49475  |
| sp P07951 TPM2_HUMAN  | 20832.676 | 555.0619  | 2809.277   |
| sp P06753 TPM3_HUMAN  | 27085.562 | 2537.8071 | 6285.5757  |
| sp P67936 TPM4_HUMAN  | 14875.672 | 2035.9996 | 2963.0938  |
| sp O14773 TPP1_HUMAN  | 4861.3354 | 1168.4258 | 4164.9233  |
| sp P29144 TPP2_HUMAN  | 11750.365 | NaN       | 2509.1968  |
| sp P12270 TPR_HUMAN   | 207.62486 | NaN       | 1023.80817 |
| sp Q5T0D9 TPRGL_HUMAN | 3544.8308 | NaN       | 2965.8772  |
| sp O60507 TPST1_HUMAN | 4041.8508 | NaN       | 3716.7732  |
| sp P13693 TCTP_HUMAN  | 11083.102 | 320.80954 | 292.22345  |
| sp P62995 TRA2B_HUMAN | 813.5721  | NaN       | 588.6644   |
| sp Q15629 TRAM1_HUMAN | 4041.7935 | 278.26224 | 2484.561   |
| sp Q15035 TRAM2_HUMAN | 328.56537 | NaN       | 8124.3354  |
| sp Q12931 TRAP1_HUMAN | 9437.17   | NaN       | 2558.227   |
| sp Q7Z392 TPC11_HUMAN | 356.26013 | NaN       | 5358.259   |
| sp O43617 TPPC3_HUMAN | 1153.1345 | NaN       | NaN        |
| sp Q9Y296 TPPC4_HUMAN | 999.1816  | NaN       | NaN        |
| sp Q9Y2L5 TPPC8_HUMAN | 308.78897 | NaN       | NaN        |
| sp Q14258 TRI25_HUMAN | 3343.521  | NaN       | NaN        |
| sp Q12899 TRI26_HUMAN | 749.7048  | NaN       | NaN        |
| sp Q13263 TIF1B_HUMAN | 5438.91   | NaN       | NaN        |
| sp Q13049 TRI32_HUMAN | 616.47736 | NaN       | NaN        |
| sp Q9C035 TRIM5_HUMAN | 0         | NaN       | NaN        |
| sp O75962 TRIO_HUMAN  | 2309.2595 | NaN       | NaN        |
| sp Q9H2D6 TARA_HUMAN  | 2556.6055 | NaN       | 249.74643  |
| sp Q14669 TRIPC_HUMAN | 737.648   | NaN       | 2136.602   |
| sp Q15645 PCH2_HUMAN  | 4007.5122 | NaN       | 348.00146  |
| sp Q15654 TRIP6_HUMAN | 1722.9901 | NaN       | 4791.6255  |
| sp Q7L0Y3 TM10C_HUMAN | 199.2464  | NaN       | 494.97195  |
| sp Q9UI30 TR112_HUMAN | 651.81635 | NaN       | 5180.9873  |
| sp Q96Q11 TRNT1_HUMAN | 345.14902 | NaN       | 5462.312   |

|                       |           |           |           |
|-----------------------|-----------|-----------|-----------|
| sp O75762 TRPA1_HUMAN | 1423.2603 | NaN       | 4158.573  |
| sp Q8TD43 TRPM4_HUMAN | 4209.675  | NaN       | 412.32098 |
| sp Q9Y5S1 TRPV2_HUMAN | 8262.72   | 120.08741 | 7017.478  |
| sp Q15714 T22D1_HUMAN | 294.93167 | NaN       | 1958.6589 |
| sp P43897 EFTS_HUMAN  | 538.0493  | NaN       | 714.4739  |
| sp Q99816 TS101_HUMAN | 1554.9963 | NaN       | 4314.6104 |
| sp Q15631 TSN_HUMAN   | 4058.384  | NaN       | 3227.8147 |
| sp Q99598 TSNAX_HUMAN | 2894.1755 | NaN       | 7606.6807 |
| sp O60637 TSN3_HUMAN  | 1631.5717 | NaN       | 2671.0862 |
| sp Q12999 TSN31_HUMAN | 212.58244 | NaN       | 2681.7617 |
| sp O43657 TSN6_HUMAN  | 3203.2766 | NaN       | 317.833   |
| sp O75954 TSN9_HUMAN  | 1346.9564 | NaN       | 2467.7664 |
| sp P30536 TSPO_HUMAN  | 4927.6787 | NaN       | 13936.564 |
| sp Q6PF05 TT23L_HUMAN | 711.2521  | 450.58768 | 10224.263 |
| sp Q6PGP7 TTC37_HUMAN | 1599.0306 | NaN       | 1283.4297 |
| sp Q8N0Z6 TTC5_HUMAN  | 477.20007 | NaN       | 2753.986  |
| sp Q14166 TTL12_HUMAN | 3580.1038 | NaN       | 3304.249  |
| sp Q8WZ42 TITIN_HUMAN | 4965.623  | NaN       | 1241.4298 |
| sp P02766 TTHY_HUMAN  | 5498.2935 | 3350.1128 | 1022.6373 |
| sp Q9C0H2 TTYH3_HUMAN | 2718.894  | NaN       | 4533.3486 |
| sp Q71U36 TBA1A_HUMAN | 136529.98 | 19049.223 | 1967.8063 |
| sp Q9BQE3 TBA1C_HUMAN | 16504.121 | 824.9951  | 3387.7358 |
| sp P68366 TBA4A_HUMAN | 97368.46  | 3116.9194 | 7690.22   |
| sp A6NHL2 TBAL3_HUMAN | 3414.7803 | NaN       | 806.3224  |
| sp P07437 TBB5_HUMAN  | 82164.36  | 8894.309  | 2678.0144 |
| sp Q9H4B7 TBB1_HUMAN  | 92.83141  | NaN       | 3438.0464 |
| sp Q13885 TBB2A_HUMAN | 21578.283 | 1392.5366 | 727.736   |
| sp Q13509 TBB3_HUMAN  | 8144.0215 | 606.9409  | 3665.9326 |
| sp P68371 TBB4B_HUMAN | 130091.58 | 16119.684 | 10756.101 |
| sp Q9BUF5 TBB6_HUMAN  | 25167.21  | 753.2816  | 782.4539  |
| sp P23258 TBG1_HUMAN  | 3015.1887 | NaN       | 2286.8086 |
| sp Q9BSJ2 GCP2_HUMAN  | 513.3083  | NaN       | 2875.3528 |
| sp Q96CW5 GCP3_HUMAN  | 729.2698  | NaN       | 5666.9937 |



|                       |           |           |           |
|-----------------------|-----------|-----------|-----------|
| sp P49411 EFTU_HUMAN  | 18327.686 | 1877.0607 | 1688.5493 |
| sp Q13454 TUSC3_HUMAN | 578.43097 | NaN       | 743.57886 |
| sp Q96ET8 TV23C_HUMAN | 700.5077  | NaN       | 4469.857  |
| sp Q12792 TWF1_HUMAN  | 3319.72   | NaN       | 100.70639 |
| sp Q6IBS0 TWF2_HUMAN  | 3002.1648 | NaN       | 1000.0117 |
| sp Q9GZX9 TWSG1_HUMAN | 674.17145 | NaN       | 178.34325 |
| sp P40222 TXLNA_HUMAN | 1187.2382 | NaN       | 2258.0796 |
| sp P10599 THIO_HUMAN  | 51843.89  | 10089.937 | 6105.1655 |
| sp Q99757 THIOM_HUMAN | 330.01236 | NaN       | 1763.8494 |
| sp O95881 TXD12_HUMAN | 5271.821  | NaN       | 389.42886 |
| sp Q96J42 TXD15_HUMAN | 962.99756 | NaN       | 3510.7117 |
| sp Q9BRA2 TXD17_HUMAN | 1904.2711 | 184.95804 | 1071.1808 |
| sp Q8NBS9 TXND5_HUMAN | 17540.098 | 3279.0798 | 8011.7217 |
| sp O43396 TXNL1_HUMAN | 3470.0708 | NaN       | 1687.4792 |
| sp Q16881 TRXR1_HUMAN | 7730.7017 | 1550.3434 | 1119.8292 |
| sp P19971 TYPH_HUMAN  | 1208.2716 | 172.34302 | 5573.4863 |
| sp P04818 TYSY_HUMAN  | 277.86896 | NaN       | 612.86414 |
| sp Q01081 U2AF1_HUMAN | 2582.6753 | NaN       | 4216.188  |
| sp P26368 U2AF2_HUMAN | 4377.2573 | NaN       | 2355.363  |
| sp Q16222 UAP1_HUMAN  | 3028.376  | NaN       | 5025.95   |
| sp Q3KQV9 UAP1L_HUMAN | 3777.6194 | NaN       | 6009.0576 |
| sp P22314 UBA1_HUMAN  | 9276.051  | 2265.6018 | 10616.051 |
| sp Q9UBT2 SAE2_HUMAN  | 795.9674  | NaN       | 1850.3224 |
| sp Q8TBC4 UBA3_HUMAN  | 275.453   | NaN       | 312.10596 |
| sp A0AVT1 UBA6_HUMAN  | 7600.964  | NaN       | 4923.5625 |
| sp Q8NBM4 UBAC2_HUMAN | 486.6403  | NaN       | 1360.865  |
| sp Q14157 UBP2L_HUMAN | 955.5159  | NaN       | 1084.6146 |
| sp Q8TF42 UBS3B_HUMAN | 1491.3058 | NaN       | 7179.8364 |
| sp P51668 UB2D1_HUMAN | 2146.3667 | NaN       | 1719.5002 |
| sp P61077 UB2D3_HUMAN | 2122.4233 | 345.2265  | 1756.084  |
| sp P63279 UBC9_HUMAN  | 1376.8032 | NaN       | 155.41663 |
| sp P61086 UBE2K_HUMAN | 2520.4973 | NaN       | 3962.511  |
| sp P68036 UB2L3_HUMAN | 4008.451  | NaN       | 741.0254  |

|                       |           |           |            |
|-----------------------|-----------|-----------|------------|
| sp O14933 UB2L6_HUMAN | 225.15468 | NaN       | 7581.3623  |
| sp P61081 UBC12_HUMAN | 2657.6252 | NaN       | 2576.408   |
| sp P61088 UBE2N_HUMAN | 8281.165  | 175.901   | 9512.738   |
| sp Q13404 UB2V1_HUMAN | 2281.1584 | 481.30276 | 4246.743   |
| sp Q14139 UBE4A_HUMAN | 476.5257  | NaN       | 1180.0459  |
| sp O14562 UBFD1_HUMAN | 506.61404 | NaN       | 2828.746   |
| sp Q9UMX0 UBQL1_HUMAN | 3307.1912 | 818.0462  | 6253.577   |
| sp Q9UHD9 UBQL2_HUMAN | 2015.091  | NaN       | 3166.718   |
| sp Q5T4S7 UBR4_HUMAN  | 4663.413  | NaN       | 1362.399   |
| sp Q8WUN7 UBTD2_HUMAN | 333.33167 | NaN       | 3348.9233  |
| sp Q04323 UBXN1_HUMAN | 1396.1902 | NaN       | 3036.8286  |
| sp Q92575 UBXN4_HUMAN | 934.25195 | NaN       | 1022.6995  |
| sp Q9BZV1 UBXN6_HUMAN | 1927.3353 | NaN       | 608.54004  |
| sp P09936 UCHL1_HUMAN | 14459.878 | 390.27454 | 3384.3804  |
| sp P15374 UCHL3_HUMAN | 1173.7698 | NaN       | NaN        |
| sp Q9Y5K5 UCHL5_HUMAN | 265.88995 | NaN       | NaN        |
| sp Q9BZX2 UCK2_HUMAN  | 487.47546 | NaN       | NaN        |
| sp Q92890 UFD1_HUMAN  | 3142.6318 | NaN       | NaN        |
| sp O94874 UFL1_HUMAN  | 4705.3965 | NaN       | NaN        |
| sp P61960 UFM1_HUMAN  | 1728.2712 | NaN       | NaN        |
| sp Q9NUQ7 UFSP2_HUMAN | 1177.337  | NaN       | NaN        |
| sp Q16739 CEGT_HUMAN  | 24089.94  | NaN       | NaN        |
| sp O60701 UGDH_HUMAN  | 10372.192 | NaN       | NaN        |
| sp Q9NYU2 UGGG1_HUMAN | 12407.254 | NaN       | 2738.475   |
| sp Q9NYU1 UGGG2_HUMAN | 482.4141  | NaN       | 877.6964   |
| sp Q16851 UGPA_HUMAN  | 3592.9592 | 180.44615 | 5291.225   |
| sp Q9H3U1 UN45A_HUMAN | 3632.8513 | NaN       | 1108.485   |
| sp Q92900 RENT1_HUMAN | 7187.581  | NaN       | 2968.0725  |
| sp Q9UDW1 QCR9_HUMAN  | 540.4962  | NaN       | 5626.5767  |
| sp O14957 QCR10_HUMAN | 0         | NaN       | 5892.612   |
| sp P14927 QCR7_HUMAN  | 3428.3315 | NaN       | 5383.1772  |
| sp P31930 QCR1_HUMAN  | 12053.219 | 362.9095  | 6858.313   |
| sp P22695 QCR2_HUMAN  | 14177.65  | 308.30957 | 1001.65314 |

|                       |           |           |            |
|-----------------------|-----------|-----------|------------|
| sp P47985 UCRI_HUMAN  | 4825.746  | 816.33105 | 1082.0126  |
| sp P07919 QCR6_HUMAN  | 3059.4478 | NaN       | 448.69803  |
| sp O14949 QCR8_HUMAN  | 2524.588  | NaN       | 7171.983   |
| sp Q9BTM9 URM1_HUMAN  | 739.44635 | NaN       | 1011.43933 |
| sp P06132 DCUP_HUMAN  | 2427.7385 | NaN       | 164.90227  |
| sp Q9NZ43 USE1_HUMAN  | 251.6417  | NaN       | 4331.862   |
| sp O60763 USO1_HUMAN  | 5982.723  | NaN       | 3436.0283  |
| sp P54578 UBP14_HUMAN | 4704.245  | NaN       | 2070.7317  |
| sp A6NCW0 U17L3_HUMAN | 5625.3394 | 2308.6    | 538.3701   |
| sp Q9UPU5 UBP24_HUMAN | 2118.032  | NaN       | 8768.25    |
| sp Q96K76 UBP47_HUMAN | 1214.9333 | NaN       | 913.0502   |
| sp P45974 UBP5_HUMAN  | 6218.048  | NaN       | 530.71216  |
| sp Q93008 USP9X_HUMAN | 35832.273 | NaN       | 2147.2427  |
| sp P46939 UTRN_HUMAN  | 5251.581  | NaN       | 4913.795   |
| sp Q8NBZ7 UXS1_HUMAN  | 3511.334  | NaN       | 296.58508  |
| sp Q08AM6 VAC14_HUMAN | 1599.198  | NaN       | 14257.868  |
| sp P63027 VAMP2_HUMAN | 11379.257 | 517.0175  | 9533.228   |
| sp Q15836 VAMP3_HUMAN | 1747.2417 | NaN       | 1070.7036  |
| sp O95183 VAMP5_HUMAN | 8428.7    | 145.89029 | 4913.014   |
| sp Q8TAA9 VANG1_HUMAN | 1124.536  | NaN       | 13922.062  |
| sp Q9P0L0 VAPA_HUMAN  | 7780.8877 | NaN       | 239.00598  |
| sp O95292 VAPB_HUMAN  | 2510.3147 | NaN       | 1821.7557  |
| sp P26640 SYVC_HUMAN  | 10063.183 | NaN       | 2114.875   |
| sp Q6EMK4 VASN_HUMAN  | 30261.871 | NaN       | 370.1648   |
| sp P50552 VASP_HUMAN  | 4214.0205 | NaN       | 952.5636   |
| sp Q99536 VAT1_HUMAN  | 23427.496 | 4023.4167 | 1502.8082  |
| sp Q9HCJ6 VAT1L_HUMAN | 1443.7861 | NaN       | 3759.424   |
| sp P61758 PFD3_HUMAN  | 1745.934  | NaN       | 2127.2493  |
| sp P19320 VCAM1_HUMAN | 765.72766 | NaN       | 728.8136   |
| sp P18206 VINC_HUMAN  | 16365.491 | 4723.186  | 4141.6533  |
| sp P55072 TERA_HUMAN  | 25572.953 | 2898.1023 | 2290.7454  |
| sp P21796 VDAC1_HUMAN | 60833.52  | 8185.649  | 3598.283   |
| sp P45880 VDAC2_HUMAN | 23834.734 | 3562.2673 | 11853.969  |

|                       |            |           |           |
|-----------------------|------------|-----------|-----------|
| sp Q9Y277 VDAC3_HUMAN | 53343.195  | 1957.5177 | 5208.326  |
| sp P08670 VIME_HUMAN  | 106968.23  | 30308.473 | 205.10823 |
| sp Q9H9C1 SPE39_HUMAN | 522.82324  | NaN       | 203.22307 |
| sp Q9BQB6 VKOR1_HUMAN | 5057.5996  | 723.7233  | 42065.484 |
| sp Q8N0U8 VKORL_HUMAN | 1124.1005  | NaN       | 1273.9567 |
| sp Q3ZAQ7 VMA21_HUMAN | 2707.414   | NaN       | 2647.1863 |
| sp O95497 VNN1_HUMAN  | 1890.9458  | 677.8763  | 2830.6917 |
| sp O95498 VNN2_HUMAN  | 2380.5278  | 1437.0046 | 598.8447  |
| sp Q9H270 VPS11_HUMAN | 6129.554   | NaN       | 3641.7402 |
| sp Q709C8 VP13C_HUMAN | 312.98724  | NaN       | 1397.9045 |
| sp Q9H269 VPS16_HUMAN | 2273.655   | NaN       | 4352.022  |
| sp O75436 VP26A_HUMAN | 6222.329   | NaN       | NaN       |
| sp Q9UK41 VPS28_HUMAN | 2447.6436  | NaN       | NaN       |
| sp Q9UBQ0 VPS29_HUMAN | 4033.354   | NaN       | NaN       |
| sp Q96AX1 VP33A_HUMAN | 2094.4495  | NaN       | NaN       |
| sp Q96QK1 VPS35_HUMAN | 9703.643   | NaN       | NaN       |
| sp Q7Z3J2 VP35L_HUMAN | 2325.2603  | NaN       | NaN       |
| sp Q9H9H4 VP37B_HUMAN | 615.6489   | NaN       | NaN       |
| sp Q96JC1 VPS39_HUMAN | 533.67175  | NaN       | NaN       |
| sp Q9NRW7 VPS45_HUMAN | 627.567    | NaN       | NaN       |
| sp Q9UN37 VPS4A_HUMAN | 2171.676   | NaN       | 175.83478 |
| sp O75351 VPS4B_HUMAN | 1357.9734  | NaN       | 1541.209  |
| sp Q9UID3 VPS51_HUMAN | 1020.68787 | NaN       | 5638.414  |
| sp Q9NP79 VTA1_HUMAN  | 865.0243   | NaN       | 4182.522  |
| sp Q96AJ9 VTI1A_HUMAN | 947.0315   | NaN       | 2849.6904 |
| sp Q9UEU0 VTI1B_HUMAN | 255.40547  | NaN       | 1810.924  |
| sp P04004 VTNC_HUMAN  | 15548.685  | 3948.285  | 5528.123  |
| sp O00534 VMA5A_HUMAN | 2664.1985  | NaN       | 3622.0789 |
| sp P23381 SYWC_HUMAN  | 58969.67   | 258.15494 | 819.6354  |
| sp Q9Y6W5 WASF2_HUMAN | 729.7683   | NaN       | 1433.2942 |
| sp C4AMC7 WASH3_HUMAN | 5695.0107  | NaN       | 7785.927  |
| sp Q641Q2 WAC2A_HUMAN | 2641.8828  | 903.6163  | 155.81926 |
| sp Q9Y3C0 WASC3_HUMAN | 2567.601   | NaN       | 1193.1252 |

|                       |           |           |           |
|-----------------------|-----------|-----------|-----------|
| sp Q2M389 WASC4_HUMAN | 5786.5645 | NaN       | 3178.7166 |
| sp Q12768 WASC5_HUMAN | 14559.577 | NaN       | 10790.208 |
| sp Q969T9 WBP2_HUMAN  | 531.2155  | NaN       | 804.774   |
| sp Q8IWB7 WDFY1_HUMAN | 4581.264  | NaN       | 836.717   |
| sp O75083 WDR1_HUMAN  | 31064.158 | 2765.0815 | 3008.4575 |
| sp Q9BZH6 WDR11_HUMAN | 2459.9985 | NaN       | 2189.708  |
| sp Q9H7D7 WDR26_HUMAN | 0         | NaN       | 1990.8273 |
| sp Q9Y484 WIPI4_HUMAN | 840.83624 | NaN       | 506.93958 |
| sp Q9GZS3 WDR61_HUMAN | 2456.9739 | NaN       | 217.67035 |
| sp Q9BQA1 MEP50_HUMAN | 525.4582  | NaN       | 405.89334 |
| sp O76024 WFS1_HUMAN  | 3168.852  | NaN       | 5740.9785 |
| sp Q9Y4P8 WIPI2_HUMAN | 1040.9025 | NaN       | 14258.157 |
| sp Q5T9L3 WLS_HUMAN   | 5247.499  | NaN       | 387.38144 |
| sp P09544 WNT2_HUMAN  | 0         | NaN       | 8913.811  |
| sp P41221 WNT5A_HUMAN | 2996.903  | NaN       | 7463.034  |
| sp Q9H1J7 WNT5B_HUMAN | 634.02313 | NaN       | 741.0396  |
| sp Q9NQW7 XPP1_HUMAN  | 2326.7056 | NaN       | 2663.152  |
| sp O14980 XPO1_HUMAN  | 4695.4946 | NaN       | 1253.5977 |
| sp Q9C0E2 XPO4_HUMAN  | 1169.5768 | 542.34015 | 2674.4277 |
| sp Q9HAV4 XPO5_HUMAN  | 1606.289  | NaN       | 1355.443  |
| sp Q9UIA9 XPO7_HUMAN  | 1581.7427 | NaN       | 2854.1775 |
| sp O43592 XPOT_HUMAN  | 994.7251  | NaN       | 1941.5667 |
| sp P13010 XRCC5_HUMAN | 7831.382  | NaN       | 1023.7112 |
| sp P12956 XRCC6_HUMAN | 7914.941  | NaN       | 4336.911  |
| sp Q9H0D6 XRN2_HUMAN  | 8391.62   | NaN       | 9088.115  |
| sp P46937 YAP1_HUMAN  | 232.48393 | NaN       | 175.8673  |
| sp P54577 SYYC_HUMAN  | 5685.07   | NaN       | NaN       |
| sp Q9Y2Z4 SYYM_HUMAN  | 313.8427  | NaN       | NaN       |
| sp P67809 YBOX1_HUMAN | 4715.3286 | NaN       | NaN       |
| sp P16989 YBOX3_HUMAN | 162.1071  | NaN       | NaN       |
| sp P07947 YES_HUMAN   | 2724.345  | NaN       | NaN       |
| sp O95070 YIF1A_HUMAN | 783.3851  | NaN       | NaN       |
| sp Q5BJH7 YIF1B_HUMAN | 1945.7515 | NaN       | NaN       |

|                       |           |           |            |
|-----------------------|-----------|-----------|------------|
| sp Q9GZM5 YIPF3_HUMAN | 312.84686 | NaN       | NaN        |
| sp Q9BSR8 YIPF4_HUMAN | 1594.0311 | NaN       | NaN        |
| sp Q969M3 YIPF5_HUMAN | 2402.4846 | NaN       | 2773.6624  |
| sp Q96EC8 YIPF6_HUMAN | 1317.509  | NaN       | 9890.539   |
| sp O15498 YKT6_HUMAN  | 3189.191  | NaN       | 3223.1587  |
| sp Q9H6S0 YTDC2_HUMAN | 211.14795 | NaN       | 100.81494  |
| sp P31946 1433B_HUMAN | 9096.606  | 1645.4452 | 9418.32    |
| sp P62258 1433E_HUMAN | 14645.327 | 4283.944  | 3067.1445  |
| sp P61981 1433G_HUMAN | 15805.83  | 3462.8232 | 3624.89236 |
| sp Q04917 1433F_HUMAN | 5984.727  | 847.20044 | 3082.2214  |
| sp P27348 1433T_HUMAN | 24323.418 | 3051.6836 | 2365.136   |
| sp P63104 1433Z_HUMAN | 22306.648 | 5967.839  | 1937.8699  |
| sp Q7Z2W4 ZCCHV_HUMAN | 6766.6035 | NaN       | 517.7197   |
| sp Q9NUE0 ZDH18_HUMAN | 618.9265  | NaN       | 2252.339   |
| sp Q5W0Z9 ZDH20_HUMAN | 408.2673  | NaN       | 698.534    |
| sp Q9C0B5 ZDHC5_HUMAN | 224.48737 | NaN       | 250.11154  |
| sp Q07352 TISB_HUMAN  | 135.72408 | NaN       | 503.8193   |
| sp O95159 ZFPL1_HUMAN | 221.82211 | NaN       | 218.1675   |
| sp Q9HBF4 ZFYV1_HUMAN | 660.3629  | NaN       | 2263.1814  |
| sp Q9BQ24 ZFY21_HUMAN | 931.2854  | NaN       | 504.6133   |
| sp O75844 FACE1_HUMAN | 7742.6807 | 91.04682  | 4354.2393  |
| sp Q16600 ZN239_HUMAN | 878.9709  | 502.6261  | 1359.2972  |
| sp Q14966 ZN638_HUMAN | NaN       | 2339.4248 | 4653.289   |
| sp Q4V339 ZNG1F_HUMAN | 157.54727 | NaN       | 480.70203  |
| sp O75312 ZPR1_HUMAN  | 322.6214  | NaN       | 399.587    |
| sp O43264 ZW10_HUMAN  | 3262.0037 | NaN       | 3482.335   |
| sp Q15942 ZYX_HUMAN   | 2642.0137 | NaN       | 2732.2785  |

---

**Table S2 Liver and kidney indexes of mice after Matrigel plug implantation**

| <b>ALT(U/L)</b> | <b>AST(U/L)</b> | <b>BUN(mmol/L)</b> | <b>CR(<math>\mu</math>mmol/L)</b> |
|-----------------|-----------------|--------------------|-----------------------------------|
| 46.1            | 100             | 9.23               | 6.5                               |
| 30.4            | 118             | 10                 | 7.3                               |
| 36.3            | 121             | 8.8                | 6.8                               |
| 37              | 114             | 9                  | 7                                 |
| 42.6            | 96              | 10.9               | 6.9                               |
| 48.6            | 98              | 8.38               | 7.4                               |
| 35              | 110             | 9.86               | 8.8                               |

*AST: aspartate transminase, ALT: alanine transminase, BUN: blood urea nitrogen, CR: creatinine*
